# Supplementary material for: Formation of S-alkyl thiophenium ionic liquids: mechanistic rationale and structural relationships
Source: Royal Society of Chemistry journal article supplement (doi:10.1039/c9ob01181a), 2019-01-01

## Electronic Supplementary Information

### Formation of S-alkyl thiophenium ionic liquids: mechanistic rationale and structural relationships

María A. Schiel,<sup>\*a</sup> Juan García de la Concepción,<sup>b</sup> Claudia E. Domini,<sup>a</sup> Pedro Cintas<sup>b</sup> and  
Gustavo F. Silbestri<sup>\*a</sup>

<sup>a</sup>INQUISUR, Departamento de Química, Universidad Nacional del Sur (UNS)-CONICET, Av. Alem 1253, B8000CPB Bahía Blanca, Argentina.

<sup>b</sup>Departamento de Química Orgánica e Inorgánica, Facultad de Ciencias, and IACYS-Unidad de Química Verde y Desarrollo Sostenible, Universidad de Extremadura, Avda. de Elvas s/n, 06006 Badajoz, Spain.

schiel.ayelen@uns.edu.ar (M.A. Schiel); gsilbestri@uns.edu.ar (G.F. Silbestri)

This section contains the coordinates, electronic + zpe, and main vibrational data of all optimized species in their corresponding solvent.

#### Table of contents

|                                             |   |
|---------------------------------------------|---|
| Synthesis .....                             | 7 |
| Thiophenes .....                            | 7 |
| 2,5-dmt (in DCE) .....                      | 7 |
| 3-mt (in DCE) .....                         | 8 |
| 2-et (in DCE) .....                         | 8 |
| bt (in DCE) .....                           | 8 |
| 2-mbt (in DCE) .....                        | 9 |
| Alkylating intermediates .....              | 9 |
| BF <sub>4</sub> -Ag-I-CH <sub>3</sub> ..... | 9 |

|                                                                                                  |    |
|--------------------------------------------------------------------------------------------------|----|
| F <sub>3</sub> B-F-CH <sub>3</sub> (in DCE) .....                                                | 10 |
| F <sub>3</sub> P-F-CH <sub>3</sub> (in DCE) .....                                                | 10 |
| F <sub>5</sub> Sb-F-CH <sub>3</sub> (in DCE) .....                                               | 10 |
| F <sub>3</sub> B-F-CH <sub>2</sub> CH <sub>3</sub> (in DCE).....                                 | 11 |
| F <sub>3</sub> B-F-CH <sub>2</sub> CH <sub>2</sub> CH <sub>2</sub> CH <sub>3</sub> (in DCE)..... | 11 |
| NCS-CH <sub>3</sub> (in DCE) .....                                                               | 12 |
| Thiophenium salts .....                                                                          | 12 |
| 1,2,5-tmt BF <sub>4</sub> . AgI (in DCE) .....                                                   | 12 |
| 1,2,5-tmt BF <sub>4</sub> (in DCE) .....                                                         | 13 |
| 1,2,5-tmt PF <sub>6</sub> (in DCE) .....                                                         | 13 |
| 1,2,5-tmt SbF <sub>6</sub> (in DCE) .....                                                        | 14 |
| 1,3-dmt BF <sub>4</sub> (in DCE).....                                                            | 14 |
| 1,3-dmt PF <sub>6</sub> (in DCE).....                                                            | 15 |
| 1,3-dmt SbF <sub>6</sub> (in DCE) .....                                                          | 15 |
| 2e1-mt BF <sub>4</sub> (in DCE) .....                                                            | 16 |
| 2e1-mt PF <sub>6</sub> (in DCE) .....                                                            | 17 |
| 2e1-mt SbF <sub>6</sub> (in DCE).....                                                            | 17 |
| 1-mbt BF <sub>4</sub> (in DCE) .....                                                             | 18 |
| 1-mbt PF <sub>6</sub> (in DCE) .....                                                             | 19 |
| 1-mbt SbF <sub>6</sub> (in DCE) .....                                                            | 19 |
| 1,2-dmbt BF <sub>4</sub> (in DCE).....                                                           | 20 |
| 1,2-dmbt PF <sub>6</sub> (in DCE).....                                                           | 20 |
| 1,2-dmbt SbF <sub>6</sub> (in DCE).....                                                          | 21 |
| 1e2-mbt BF <sub>4</sub> (in DCE).....                                                            | 22 |
| 1b2-mbt BF <sub>4</sub> (in DCE) .....                                                           | 22 |
| 1,2,5-tmt SCN (in DCE).....                                                                      | 23 |
| TS- alkylation .....                                                                             | 24 |
| TS: BF <sub>4</sub> -Ag-I-CH <sub>3</sub> + 2,5-dmt -> 1,2,5-tmt BF <sub>4</sub> . AgI .....     | 24 |
| TS: F <sub>3</sub> B-F-CH <sub>3</sub> + 2,5- dmt --> 1,2,5-tmt BF <sub>4</sub> .....            | 24 |
| TS: F <sub>3</sub> P-F-CH <sub>3</sub> + 2,5- dmt --> 1,2,5-tmt PF <sub>6</sub> .....            | 25 |
| TS: F <sub>5</sub> Sb-F-CH <sub>3</sub> + 2,5- dmt --> 1,2,5-tmt SbF <sub>6</sub> .....          | 26 |

|                                                                                                                                      |    |
|--------------------------------------------------------------------------------------------------------------------------------------|----|
| TS: F <sub>3</sub> B-F-CH <sub>3</sub> + 3-mt --> 1,3-dmt BF <sub>4</sub> .....                                                      | 26 |
| TS: F <sub>3</sub> P-F-CH <sub>3</sub> + 3-mt --> 1,3-dmt PF <sub>6</sub> .....                                                      | 27 |
| TS: F <sub>5</sub> Sb-F-CH <sub>3</sub> + 3-mt --> 1,3-dmt SbF <sub>6</sub> .....                                                    | 28 |
| TS: F <sub>3</sub> B-F-CH <sub>3</sub> + 2-et --> 1m2-et BF <sub>4</sub> .....                                                       | 28 |
| TS: F <sub>3</sub> P-F-CH <sub>3</sub> + 2-et --> 1m2-et PF <sub>6</sub> .....                                                       | 29 |
| TS: F <sub>5</sub> Sb-F-CH <sub>3</sub> + 2-et --> 1m2-et SbF <sub>6</sub> .....                                                     | 29 |
| TS: F <sub>3</sub> B-F-CH <sub>3</sub> + bt --> 1-mbt BF <sub>4</sub> .....                                                          | 30 |
| TS: F <sub>3</sub> P-F-CH <sub>3</sub> + bt --> 1-mbt PF <sub>6</sub> .....                                                          | 31 |
| TS: F <sub>5</sub> Sb-F-CH <sub>3</sub> + bt --> 1-mbt SbF <sub>6</sub> .....                                                        | 31 |
| TS: F <sub>3</sub> B-F-CH <sub>3</sub> + 2-mbt --> 1,2-dmbt BF <sub>4</sub> .....                                                    | 32 |
| TS: F <sub>3</sub> P-F-CH <sub>3</sub> + 2-mbt --> 1,2-dmbt PF <sub>6</sub> .....                                                    | 32 |
| TS: F <sub>5</sub> Sb-F-CH <sub>3</sub> + 2-mbt --> 1,2-dmbt SbF <sub>6</sub> .....                                                  | 33 |
| TS: F <sub>5</sub> Sb-F-CH <sub>2</sub> -CH <sub>3</sub> + 2-mbt --> 1e2-mbt BF <sub>4</sub> .....                                   | 34 |
| TS: F <sub>5</sub> Sb-F-CH <sub>2</sub> -CH <sub>2</sub> -CH <sub>2</sub> -CH <sub>3</sub> + 2-mbt --> 1e2-mbt BF <sub>4</sub> ..... | 34 |
| TS: NCS-CH <sub>3</sub> + 2,5- dmt --> 1,2,5-tmt BF <sub>4</sub> .....                                                               | 35 |
| Solvolysis .....                                                                                                                     | 36 |
| Basic aqueous .....                                                                                                                  | 36 |
| Thiophenium cations + nucleophile.....                                                                                               | 36 |
| 1,2,5-tmt OH (in water).....                                                                                                         | 36 |
| 1,3-dmt OH (in water).....                                                                                                           | 36 |
| 1m2-et OH (in water) .....                                                                                                           | 37 |
| 1-mbt OH (in water).....                                                                                                             | 37 |
| 1,2-dmbt OH in water .....                                                                                                           | 38 |
| 1e2-mbt OH in water.....                                                                                                             | 39 |
| 1b2-mbt OH (in water).....                                                                                                           | 39 |
| TS basic hydrolysis.....                                                                                                             | 40 |
| TS: 1,2,5-tmt OH --> 2,5-dmt + CH <sub>3</sub> OH (in water) .....                                                                   | 40 |
| TS: 1,3-dmt OH --> 3-mt + CH <sub>3</sub> OH (in water) .....                                                                        | 40 |
| TS: 2e1-mt OH --> 2-et + CH <sub>3</sub> OH (in water) .....                                                                         | 41 |
| TS: 1-mbt OH --> bt + CH <sub>3</sub> OH (in water) .....                                                                            | 42 |
| TS: 1,2-dmbt OH --> 2-mbt + CH <sub>3</sub> OH (in water).....                                                                       | 42 |

|                                                                                                                                           |    |
|-------------------------------------------------------------------------------------------------------------------------------------------|----|
| TS: 1e2-mbt OH --> 2-mbt + CH <sub>3</sub> CH <sub>2</sub> OH (in water) .....                                                            | 43 |
| TS: 1b2-mbt OH --> 2-mbt + CH <sub>3</sub> CH <sub>2</sub> CH <sub>2</sub> CH <sub>2</sub> OH (in water).....                             | 43 |
| Neutral aqueous .....                                                                                                                     | 44 |
| Thiophenium cations +1H <sub>2</sub> O.....                                                                                               | 44 |
| 1,2,5-tmt H <sub>2</sub> O (in water) .....                                                                                               | 44 |
| 1,3-dmt H <sub>2</sub> O (in water) .....                                                                                                 | 45 |
| 2e1-mt H <sub>2</sub> O (in water).....                                                                                                   | 45 |
| 1-mbt H <sub>2</sub> O (in water).....                                                                                                    | 46 |
| 1,2-dmbt H <sub>2</sub> O (in water) .....                                                                                                | 47 |
| 1e2-mbt H <sub>2</sub> O (in water).....                                                                                                  | 47 |
| 1b2-mbt H <sub>2</sub> O (in water) .....                                                                                                 | 48 |
| TS neutral hydrolysis (1 H <sub>2</sub> O).....                                                                                           | 49 |
| TS: 1,2,5-tmt H <sub>2</sub> O --> 2,5-dmt + CH <sub>3</sub> OH <sub>2</sub> (in water).....                                              | 49 |
| TS: 1,3-dmt H <sub>2</sub> O --> 3-mt + CH <sub>3</sub> OH <sub>2</sub> (in water).....                                                   | 49 |
| TS: 2e1-mt H <sub>2</sub> O --> 2-et + CH <sub>3</sub> OH <sub>2</sub> (in water).....                                                    | 50 |
| TS: 1-mbt H <sub>2</sub> O --> bt + CH <sub>3</sub> OH <sub>2</sub> (in water).....                                                       | 50 |
| TS: 1,2-dmbt H <sub>2</sub> O --> 2-mbt + CH <sub>3</sub> OH <sub>2</sub> (in water) .....                                                | 51 |
| TS: 1e2-mbt H <sub>2</sub> O --> 2-mbt + CH <sub>3</sub> CH <sub>2</sub> OH <sub>2</sub> (in water) .....                                 | 51 |
| TS: 1b2-mbt H <sub>2</sub> O --> 2-mbt + CH <sub>3</sub> CH <sub>2</sub> CH <sub>2</sub> CH <sub>2</sub> OH <sub>2</sub> (in water) ..... | 52 |
| Thiophenium cations + 4 H <sub>2</sub> O.....                                                                                             | 53 |
| 1,2,5-tmt 4 H <sub>2</sub> O (in water) .....                                                                                             | 53 |
| 1,3-dmt 4 H <sub>2</sub> O (in water) .....                                                                                               | 54 |
| 2e1-mt 4 H <sub>2</sub> O (in water).....                                                                                                 | 54 |
| 1-mbt 4 H <sub>2</sub> O (in water).....                                                                                                  | 55 |
| 1,2-dmbt 4 H <sub>2</sub> O (in water) .....                                                                                              | 56 |
| 1e2-mbt 4 H <sub>2</sub> O (in water).....                                                                                                | 56 |
| 1b2-mbt 4 H <sub>2</sub> O (in water) .....                                                                                               | 57 |
| TS neutral hydrolysis (1 H <sub>2</sub> O).....                                                                                           | 58 |
| TS: 1,2,5-tmt 4 H <sub>2</sub> O --> 2,5-dmt + CH <sub>3</sub> OH H <sub>3</sub> O <sup>+</sup> 2H <sub>2</sub> O (in water).....         | 58 |
| TS: 1,3-dmt 4 H <sub>2</sub> O --> 3-mt + CH <sub>3</sub> OH H <sub>3</sub> O <sup>+</sup> 2H <sub>2</sub> O (in water) .....             | 59 |
| TS: 2e1-mt 4 H <sub>2</sub> O --> 3-et + CH <sub>3</sub> OH H <sub>3</sub> O <sup>+</sup> 2H <sub>2</sub> O (in water) .....              | 59 |

|                                                                                                                                                                                |    |
|--------------------------------------------------------------------------------------------------------------------------------------------------------------------------------|----|
| TS: 1-mbt 4 H <sub>2</sub> O --> bt + CH <sub>3</sub> OH H <sub>3</sub> O <sup>+</sup> 2H <sub>2</sub> O (in water) .....                                                      | 60 |
| TS: 12-dmbt 4 H <sub>2</sub> O --> 2-mbt + CH <sub>3</sub> OH H <sub>3</sub> O <sup>+</sup> 2H <sub>2</sub> O (in water) .....                                                 | 61 |
| TS: 1e2-mbt 4 H <sub>2</sub> O --> 2-mbt + CH <sub>3</sub> CH <sub>2</sub> OH H <sub>3</sub> O <sup>+</sup> 2H <sub>2</sub> O (in water) .....                                 | 61 |
| TS: 1b2-mbt 4 H <sub>2</sub> O --> 2-mbt + CH <sub>3</sub> CH <sub>2</sub> CH <sub>2</sub> CH <sub>2</sub> OH H <sub>3</sub> O <sup>+</sup> 2H <sub>2</sub> O (in water) ..... | 62 |
| Hydrolysis products.....                                                                                                                                                       | 63 |
| 2,5-dmt (in water) .....                                                                                                                                                       | 63 |
| 3-mt (in water).....                                                                                                                                                           | 64 |
| 2-et (in water) .....                                                                                                                                                          | 64 |
| bt (in water) .....                                                                                                                                                            | 64 |
| 2-mbt (in water) .....                                                                                                                                                         | 65 |
| CH <sub>3</sub> OH (in water).....                                                                                                                                             | 65 |
| CH <sub>3</sub> CH <sub>2</sub> OH (in water) .....                                                                                                                            | 66 |
| CH <sub>3</sub> CH <sub>2</sub> CH <sub>2</sub> CH <sub>2</sub> OH (in water) .....                                                                                            | 66 |
| CH <sub>3</sub> OH <sub>2</sub> (in water).....                                                                                                                                | 67 |
| CH <sub>3</sub> CH <sub>2</sub> OH <sub>2</sub> (in water) .....                                                                                                               | 67 |
| CH <sub>3</sub> CH <sub>2</sub> CH <sub>2</sub> CH <sub>2</sub> OH <sub>2</sub> (in water) .....                                                                               | 67 |
| CH <sub>3</sub> OH H <sub>3</sub> O <sup>+</sup> 2H <sub>2</sub> O (in water) .....                                                                                            | 68 |
| CH <sub>3</sub> CH <sub>2</sub> OH H <sub>3</sub> O <sup>+</sup> 2H <sub>2</sub> O (in water) .....                                                                            | 68 |
| CH <sub>3</sub> CH <sub>2</sub> CH <sub>2</sub> CH <sub>2</sub> OH H <sub>3</sub> O <sup>+</sup> 2H <sub>2</sub> O (in water) .....                                            | 69 |
| Methanolysis S <sub>N</sub> 2.....                                                                                                                                             | 69 |
| Thiophenium cations + nucleophile.....                                                                                                                                         | 69 |
| 1,2,5-tmt CH <sub>3</sub> OH (in methanol).....                                                                                                                                | 69 |
| 1,3-dmt CH <sub>3</sub> OH (in methanol).....                                                                                                                                  | 70 |
| 2e1- mt CH <sub>3</sub> OH (in methanol) .....                                                                                                                                 | 70 |
| 1-mbt CH <sub>3</sub> OH (in methanol).....                                                                                                                                    | 71 |
| 1,2-dmbt CH <sub>3</sub> OH (in methanol) .....                                                                                                                                | 72 |
| 1e2-mbt CH <sub>3</sub> OH (in methanol).....                                                                                                                                  | 72 |
| 1b2-mbt CH <sub>3</sub> OH (in methanol).....                                                                                                                                  | 73 |
| Transition state methanolisys S <sub>N</sub> 2.....                                                                                                                            | 74 |
| TS: 1,2,5-tmt CH <sub>3</sub> OH --> 2,5-dmt + CH <sub>3</sub> OHCH <sub>3</sub> (in methanol).....                                                                            | 74 |
| TS: 1,3-dmt CH <sub>3</sub> OH --> 3-mt + CH <sub>3</sub> OHCH <sub>3</sub> (in methanol).....                                                                                 | 74 |

|                                                                                                                                                                     |    |
|---------------------------------------------------------------------------------------------------------------------------------------------------------------------|----|
| TS: 2e1-mt CH <sub>3</sub> OH --> 2-et + CH <sub>3</sub> OHCH <sub>3</sub> (in methanol) .....                                                                      | 75 |
| TS: 1-mbt CH <sub>3</sub> OH --> bt + CH <sub>3</sub> OHCH <sub>3</sub> (in methanol).....                                                                          | 76 |
| TS: 1,2-dmbt CH <sub>3</sub> OH --> 2-mbt + CH <sub>3</sub> OHCH <sub>3</sub> (in methanol) .....                                                                   | 76 |
| TS: 1e2-mbt CH <sub>3</sub> OH --> 2-mbt + CH <sub>3</sub> CH <sub>2</sub> OHCH <sub>3</sub> (in methanol).....                                                     | 77 |
| TS: 1b2-mbt CH <sub>3</sub> OH --> 2-mbt + CH <sub>3</sub> CH <sub>2</sub> CH <sub>2</sub> CH <sub>2</sub> OHCH <sub>3</sub> (in methanol) .....                    | 77 |
| Methanolysis S <sub>N</sub> 3 .....                                                                                                                                 | 78 |
| Thiophenium cations + nucleophile.....                                                                                                                              | 78 |
| 1,2,5-tmt 2CH <sub>3</sub> OH (in methanol).....                                                                                                                    | 78 |
| 1,3-dmt 2CH <sub>3</sub> OH (in methanol).....                                                                                                                      | 79 |
| 2e1-mt 2CH <sub>3</sub> OH (in methanol) .....                                                                                                                      | 80 |
| 1-mbt 2CH <sub>3</sub> OH (in methanol).....                                                                                                                        | 81 |
| 1,2-dmbt 2CH <sub>3</sub> OH (in methanol) .....                                                                                                                    | 81 |
| 1e2-mbt 2CH <sub>3</sub> OH (in methanol).....                                                                                                                      | 82 |
| 1b2-mbt 2CH <sub>3</sub> OH (in methanol).....                                                                                                                      | 83 |
| Transition state methanolysis S <sub>N</sub> 3.....                                                                                                                 | 84 |
| TS: 1,2,5-tmt 2CH <sub>3</sub> OH --> 2,5-dmt + CH <sub>3</sub> OH(OHCH <sub>3</sub> )CH <sub>3</sub> (in methanol).....                                            | 84 |
| TS: 1,3-dmt 2CH <sub>3</sub> OH --> 3-mt + CH <sub>3</sub> OH(OHCH <sub>3</sub> )CH <sub>3</sub> (in methanol) .....                                                | 84 |
| TS: 2e1-mt 2CH <sub>3</sub> OH --> 2-et + CH <sub>3</sub> OH(OHCH <sub>3</sub> )CH <sub>3</sub> (in methanol) .....                                                 | 85 |
| TS: 1-mbt 2CH <sub>3</sub> OH --> bt + CH <sub>3</sub> OH(OHCH <sub>3</sub> )CH <sub>3</sub> (in methanol) .....                                                    | 86 |
| TS: 1,2-dmbt 2CH <sub>3</sub> OH --> 2-mbt + CH <sub>3</sub> OH(OHCH <sub>3</sub> )CH <sub>3</sub> (in methanol).....                                               | 86 |
| TS: 1e2-mbt 2CH <sub>3</sub> OH --> 2-mbt + CH <sub>3</sub> CH <sub>2</sub> OH(OHCH <sub>3</sub> )CH <sub>3</sub> (in methanol).....                                | 87 |
| TS: 1b2-mbt 2CH <sub>3</sub> OH --> 2-mbt + CH <sub>3</sub> CH <sub>2</sub> CH <sub>2</sub> CH <sub>2</sub> OH(OHCH <sub>3</sub> )CH <sub>3</sub> (in methanol).... | 88 |
| Methanolysis byproducts .....                                                                                                                                       | 89 |
| 2,5-dmt (in methanol) .....                                                                                                                                         | 89 |
| 3-mt (in methanol) .....                                                                                                                                            | 89 |
| 2-et (in methanol).....                                                                                                                                             | 90 |
| Bt (in methanol).....                                                                                                                                               | 90 |
| 2-mbt (in methanol).....                                                                                                                                            | 90 |
| CH <sub>3</sub> OHCH <sub>3</sub> (in methanol) .....                                                                                                               | 91 |
| CH <sub>3</sub> CH <sub>2</sub> OHCH <sub>3</sub> (in methanol) .....                                                                                               | 91 |
| CH <sub>3</sub> CH <sub>2</sub> CH <sub>2</sub> CH <sub>2</sub> OHCH <sub>3</sub> (in methanol) .....                                                               | 92 |

|                                                                                                                           |    |
|---------------------------------------------------------------------------------------------------------------------------|----|
| CH <sub>3</sub> OH(OHCH <sub>3</sub> )CH <sub>3</sub> (in methanol) .....                                                 | 92 |
| CH <sub>2</sub> OH(OHCH <sub>3</sub> )CH <sub>3</sub> (in methanol) .....                                                 | 93 |
| CH <sub>3</sub> CH <sub>2</sub> CH <sub>2</sub> CH <sub>2</sub> OH(OHCH <sub>3</sub> )CH <sub>3</sub> (in methanol) ..... | 93 |
| IRCs .....                                                                                                                | 94 |
| Synthesis Reaction coordinates .....                                                                                      | 94 |
| F <sub>3</sub> B-F-CH <sub>3</sub> + 2,5- dmt --> 1,2,5-tmt BF <sub>4</sub> .....                                         | 94 |
| F <sub>5</sub> P-F-CH <sub>3</sub> + 2,5- dmt --> 1,2,5-tmt PF <sub>6</sub> .....                                         | 94 |
| F <sub>5</sub> Sb-F-CH <sub>3</sub> + 2,5- dmt --> 1,2,5-tmt SbF <sub>6</sub> .....                                       | 95 |
| NCS-CH <sub>3</sub> + 2,5- dmt --> 1,2,5-tmt SbF <sub>6</sub> .....                                                       | 95 |
| Solvolyis Reaction coordinates .....                                                                                      | 96 |
| 1,2,5-tmt OH --> 2,5-dmt + CH <sub>3</sub> OH .....                                                                       | 96 |
| 1,2,5-tmt H <sub>2</sub> O --> 2,5-dmt + CH <sub>3</sub> OH <sub>2</sub> .....                                            | 96 |
| 1,2,5-tmt 4 H <sub>2</sub> O --> 2,5-dmt + CH <sub>3</sub> OH H <sub>3</sub> O <sup>+</sup> 2H <sub>2</sub> O .....       | 97 |
| 1,2,5-tmt CH <sub>3</sub> OH --> 2,5-dmt + CH <sub>3</sub> OHCH <sub>3</sub> .....                                        | 97 |
| 1,2,5-tmt 2CH <sub>3</sub> OH --> 2,5-dmt + CH <sub>3</sub> OH(OHCH <sub>3</sub> )CH <sub>3</sub> .....                   | 98 |

## Synthesis

### Thiophenes

2,5-dmt (in DCE)

Sum of electronic and zero-point Energies= -631.460670 (Hartree/particle)

Sum of electronic and thermal Free Energies= -631.492018 (Hartree/particle)

No imaginary frequencies

Standard orientation:

| Center<br>Number | Atomic<br>Number | Atomic<br>Type | Coordinates (Angstroms) |           |           |
|------------------|------------------|----------------|-------------------------|-----------|-----------|
|                  |                  |                | X                       | Y         | Z         |
| 1                | 6                | 0              | 1.259461                | -0.126192 | 0.000022  |
| 2                | 6                | 0              | 0.715997                | -1.374896 | -0.000084 |
| 3                | 6                | 0              | -0.715998               | -1.374896 | 0.000070  |
| 4                | 6                | 0              | -1.259461               | -0.126192 | -0.000005 |
| 5                | 16               | 0              | 0.000000                | 1.075301  | -0.000014 |
| 6                | 1                | 0              | 1.322802                | -2.273286 | -0.000135 |
| 7                | 1                | 0              | -1.322802               | -2.273286 | 0.000108  |
| 8                | 6                | 0              | -2.703028               | 0.265751  | -0.000003 |
| 9                | 1                | 0              | -2.962525               | 0.857031  | 0.881860  |
| 10               | 1                | 0              | -2.962554               | 0.856984  | -0.881890 |
| 11               | 1                | 0              | -3.325006               | -0.631109 | 0.000033  |
| 12               | 6                | 0              | 2.703028                | 0.265751  | 0.000029  |
| 13               | 1                | 0              | 2.962532                | 0.857024  | -0.881837 |
| 14               | 1                | 0              | 2.962547                | 0.856990  | 0.881913  |
| 15               | 1                | 0              | 3.325006                | -0.631109 | 0.000004  |

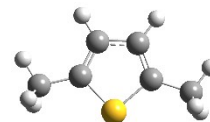

### 3-mt (in DCE)

Sum of electronic and zero-point Energies= -592.181787 (Hartree/particle)

Sum of electronic and thermal Free Energies= -592.211719 (Hartree/particle)

No imaginary frequencies

Standard orientation:

| Center Number | Atomic Number | Atomic Type | Coordinates (Angstroms) |           |           |
|---------------|---------------|-------------|-------------------------|-----------|-----------|
|               |               |             | X                       | Y         | Z         |
| 1             | 6             | 0           | 1.035859                | 1.147027  | -0.000173 |
| 2             | 6             | 0           | -0.321363               | 1.244860  | 0.000149  |
| 3             | 6             | 0           | -0.979783               | -0.030217 | -0.000073 |
| 4             | 6             | 0           | -0.080638               | -1.056151 | -0.000053 |
| 5             | 16            | 0           | 1.553616                | -0.497477 | 0.000060  |
| 6             | 1             | 0           | -0.850927               | 2.190530  | 0.000269  |
| 7             | 1             | 0           | -0.285431               | -2.118020 | -0.000053 |
| 8             | 1             | 0           | 1.766255                | 1.943874  | -0.000259 |
| 9             | 6             | 0           | -2.470958               | -0.197061 | -0.000009 |
| 10            | 1             | 0           | -2.918363               | 0.271955  | 0.880282  |
| 11            | 1             | 0           | -2.918494               | 0.272381  | -0.880004 |
| 12            | 1             | 0           | -2.749603               | -1.251831 | -0.000234 |

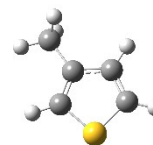

### 2-et (in DCE)

Sum of electronic and zero-point Energies= -631.456379 (Hartree/particle)

Sum of electronic and thermal Free Energies= -631.488304 (Hartree/particle)

No imaginary frequencies

Standard orientation:

| Center Number | Atomic Number | Atomic Type | Coordinates (Angstroms) |           |           |
|---------------|---------------|-------------|-------------------------|-----------|-----------|
|               |               |             | X                       | Y         | Z         |
| 1             | 6             | 0           | 2.016478                | -0.441585 | 0.170571  |
| 2             | 6             | 0           | 1.926122                | 0.914625  | 0.227529  |
| 3             | 6             | 0           | 0.594579                | 1.384632  | -0.001597 |
| 4             | 6             | 0           | -0.305263               | 0.383956  | -0.228731 |
| 5             | 16            | 0           | 0.483715                | -1.163512 | -0.160734 |
| 6             | 1             | 0           | 2.772149                | 1.560189  | 0.427914  |
| 7             | 1             | 0           | 0.312507                | 2.431277  | 0.000292  |
| 8             | 6             | 0           | -1.777767               | 0.497181  | -0.494808 |
| 9             | 1             | 0           | -2.008757               | 0.093604  | -1.485801 |
| 10            | 1             | 0           | -2.024010               | 1.561858  | -0.524574 |
| 11            | 6             | 0           | -2.637869               | -0.206874 | 0.556458  |
| 12            | 1             | 0           | -3.699098               | -0.049642 | 0.351309  |
| 13            | 1             | 0           | -2.456823               | -1.284647 | 0.562980  |
| 14            | 1             | 0           | -2.421916               | 0.176968  | 1.556349  |
| 15            | 1             | 0           | 2.888822                | -1.065028 | 0.306740  |

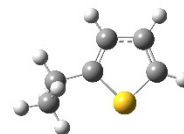

### bt (in DCE)

Sum of electronic and zero-point Energies= -706.481805 (Hartree/particle)

Sum of electronic and thermal Free Energies= -706.512792 (Hartree/particle)

No imaginary frequencies

Standard orientation:

| Center Number | Atomic Number | Atomic Type | Coordinates (Angstroms) |   |   |
|---------------|---------------|-------------|-------------------------|---|---|
|               |               |             | X                       | Y | Z |

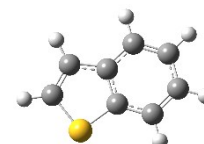



|    |    |   |           |           |           |
|----|----|---|-----------|-----------|-----------|
| 1  | 6  | 0 | 0.109426  | 0.847375  | 0.000063  |
| 2  | 6  | 0 | -0.062143 | -0.551281 | -0.000037 |
| 3  | 6  | 0 | 1.028414  | -1.425475 | 0.000061  |
| 4  | 6  | 0 | 2.302171  | -0.882225 | 0.000255  |
| 5  | 6  | 0 | 2.493040  | 0.510354  | 0.000355  |
| 6  | 6  | 0 | 1.411912  | 1.372676  | 0.000260  |
| 7  | 6  | 0 | -1.152763 | 1.545399  | -0.000067 |
| 8  | 6  | 0 | -2.211104 | 0.705094  | -0.000253 |
| 9  | 1  | 0 | 0.880986  | -2.499791 | -0.000016 |
| 10 | 1  | 0 | 3.163103  | -1.541422 | 0.000332  |
| 11 | 1  | 0 | 3.500960  | 0.909877  | 0.000510  |
| 12 | 1  | 0 | 1.560387  | 2.447496  | 0.000335  |
| 13 | 1  | 0 | -1.242039 | 2.624635  | -0.000021 |
| 14 | 1  | 0 | -3.261330 | 0.963140  | -0.000374 |
| 15 | 16 | 0 | -1.757236 | -0.977215 | -0.000286 |

### 2-mbt (in DCE)

Sum of electronic and zero-point Energies= -745.762621 (Hartree/particle)  
 Sum of electronic and thermal Free Energies= -745.796033 (Hartree/particle)  
 No imaginary frequencies

Standard orientation:

| Center Number | Atomic Number | Atomic Type | Coordinates (Angstroms) |           |           |
|---------------|---------------|-------------|-------------------------|-----------|-----------|
|               |               |             | X                       | Y         | Z         |
| 1             | 6             | 0           | -0.399704               | 0.792853  | -0.000101 |
| 2             | 6             | 0           | -0.427481               | -0.615580 | -0.000053 |
| 3             | 6             | 0           | -1.628615               | -1.327121 | -0.000167 |
| 4             | 6             | 0           | -2.815826               | -0.610946 | -0.000318 |
| 5             | 6             | 0           | -2.808461               | 0.793174  | -0.000361 |
| 6             | 6             | 0           | -1.614902               | 1.494708  | -0.000257 |
| 7             | 6             | 0           | 0.948531                | 1.305382  | 0.000047  |
| 8             | 6             | 0           | 1.895966                | 0.338631  | 0.000216  |
| 9             | 1             | 0           | -1.634627               | -2.411612 | -0.000132 |
| 10            | 1             | 0           | -3.760074               | -1.143956 | -0.000406 |
| 11            | 1             | 0           | -3.749306               | 1.332280  | -0.000478 |
| 12            | 1             | 0           | -1.610726               | 2.579824  | -0.000289 |
| 13            | 1             | 0           | 1.187134                | 2.362975  | 0.000041  |
| 14            | 16            | 0           | 1.192259                | -1.270802 | 0.000183  |
| 15            | 6             | 0           | 3.381845                | 0.494853  | 0.000453  |
| 16            | 1             | 0           | 3.830796                | 0.031793  | 0.882630  |
| 17            | 1             | 0           | 3.831151                | 0.031379  | -0.881323 |
| 18            | 1             | 0           | 3.641395                | 1.554434  | 0.000266  |

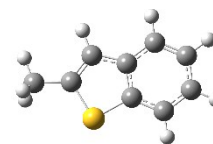

### Alkylating intermediates

#### BF<sub>4</sub>-Ag-I-CH<sub>3</sub>

Sum of electronic and zero-point Energies= -621.378978 (Hartree/particle)  
 Sum of electronic and thermal Free Energies= -621.422031 (Hartree/particle)  
 No imaginary frequencies

Standard orientation:

| Center Number | Atomic Number | Atomic Type | Coordinates (Angstroms) |          |           |
|---------------|---------------|-------------|-------------------------|----------|-----------|
|               |               |             | X                       | Y        | Z         |
| 1             | 6             | 0           | -2.690090               | 1.899656 | -0.000255 |

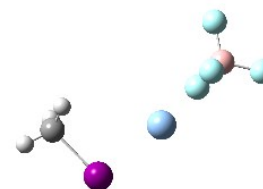

|    |    |   |           |           |           |
|----|----|---|-----------|-----------|-----------|
| 2  | 1  | 0 | -3.756008 | 2.100411  | 0.000874  |
| 3  | 1  | 0 | -2.210571 | 2.267701  | -0.900310 |
| 4  | 1  | 0 | -2.208341 | 2.268365  | 0.898368  |
| 5  | 53 | 0 | -2.474029 | -0.248568 | 0.000358  |
| 6  | 47 | 0 | 0.371215  | -0.229440 | -0.000680 |
| 7  | 9  | 0 | 2.544082  | 0.072836  | -1.135696 |
| 8  | 5  | 0 | 3.399931  | 0.147696  | 0.000446  |
| 9  | 9  | 0 | 2.543967  | 0.079950  | 1.136814  |
| 10 | 9  | 0 | 4.272141  | -0.931891 | 0.003694  |
| 11 | 9  | 0 | 4.083391  | 1.355203  | -0.003329 |

F<sub>3</sub>B-F-CH<sub>3</sub> (in DCE)

Sum of electronic and zero-point Energies= -464.247239 (Hartree/particle)

Sum of electronic and thermal Free Energies= -464.279890 (Hartree/particle)

No imaginary frequencies

Standard orientation:

| Center<br>Number | Atomic<br>Number | Atomic<br>Type | Coordinates (Angstroms) |           |           |
|------------------|------------------|----------------|-------------------------|-----------|-----------|
|                  |                  |                | X                       | Y         | Z         |
| 1                | 5                | 0              | -0.897634               | -0.124929 | -0.012755 |
| 2                | 6                | 0              | 2.205412                | -0.133165 | -0.000368 |
| 3                | 1                | 0              | 2.403298                | -0.343591 | -1.048941 |
| 4                | 1                | 0              | 3.042668                | 0.378248  | 0.468155  |
| 5                | 1                | 0              | 1.942534                | -1.038012 | 0.544428  |
| 6                | 9                | 0              | -0.862162               | -0.538096 | 1.241555  |
| 7                | 9                | 0              | 1.098223                | 0.741543  | 0.057000  |
| 8                | 9                | 0              | -0.568729               | -0.965320 | -0.979408 |
| 9                | 9                | 0              | -1.459865               | 1.031539  | -0.307775 |

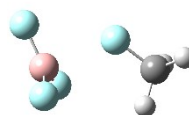

F<sub>5</sub>P-F-CH<sub>3</sub> (in DCE)

Sum of electronic and zero-point Energies= -980.355054 (Hartree/particle)

Sum of electronic and thermal Free Energies= -980.389965 (Hartree/particle)

No imaginary frequencies

Standard orientation:

| Center<br>Number | Atomic<br>Number | Atomic<br>Type | Coordinates (Angstroms) |           |           |
|------------------|------------------|----------------|-------------------------|-----------|-----------|
|                  |                  |                | X                       | Y         | Z         |
| 1                | 15               | 0              | -0.545391               | 0.031943  | 0.000097  |
| 2                | 9                | 0              | -2.030844               | 0.499694  | 0.003462  |
| 3                | 9                | 0              | 0.146605                | 1.451167  | -0.177990 |
| 4                | 9                | 0              | -0.383806               | -0.199770 | -1.560887 |
| 5                | 9                | 0              | 1.489917                | -0.656395 | 0.000395  |
| 6                | 9                | 0              | -0.782667               | -1.523742 | 0.177223  |
| 7                | 9                | 0              | -0.271069               | 0.138132  | 1.559477  |
| 8                | 6                | 0              | 2.656129                | 0.180707  | -0.001919 |
| 9                | 1                | 0              | 2.627315                | 0.765078  | -0.916341 |
| 10               | 1                | 0              | 3.496630                | -0.505927 | 0.019431  |
| 11               | 1                | 0              | 2.606917                | 0.795684  | 0.891846  |

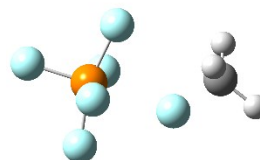

F<sub>5</sub>Sb-F-CH<sub>3</sub> (in DCE)

Sum of electronic and zero-point Energies= -644.355819 (Hartree/particle)

Sum of electronic and thermal Free Energies= -644.391634 (Hartree/particle)

No imaginary frequencies

Standard orientation:

| Center Number | Atomic Number | Atomic Type | Coordinates (Angstroms) |           |           |
|---------------|---------------|-------------|-------------------------|-----------|-----------|
|               |               |             | X                       | Y         | Z         |
| 1             | 9             | 0           | 2.125088                | -0.630449 | 0.002696  |
| 2             | 9             | 0           | -0.495336               | -1.695950 | 0.002773  |
| 3             | 9             | 0           | 0.136715                | 0.040264  | -1.864613 |
| 4             | 9             | 0           | -1.659585               | 0.673081  | -0.002109 |
| 5             | 9             | 0           | 0.708344                | 1.823081  | -0.003530 |
| 6             | 9             | 0           | 0.134658                | 0.047894  | 1.864121  |
| 7             | 6             | 0           | -2.915596               | -0.096740 | 0.000433  |
| 8             | 1             | 0           | -2.897193               | -0.688893 | -0.907504 |
| 9             | 1             | 0           | -3.679168               | 0.672956  | -0.000633 |
| 10            | 1             | 0           | -2.895688               | -0.685112 | 0.910777  |
| 11            | 51            | 0           | 0.361111                | -0.020388 | 0.000014  |

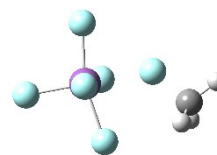

F<sub>3</sub>B-F-CH<sub>2</sub>CH<sub>3</sub> (in DCE)

Sum of electronic and zero-point Energies= -503.529495 (Hartree/particle)  
 Sum of electronic and thermal Free Energies= -503.564168 (Hartree/particle)  
 No imaginary frequencies

Standard orientation:

| Center Number | Atomic Number | Atomic Type | Coordinates (Angstroms) |           |           |
|---------------|---------------|-------------|-------------------------|-----------|-----------|
|               |               |             | X                       | Y         | Z         |
| 1             | 6             | 0           | 1.572460                | 0.505422  | -0.032670 |
| 2             | 1             | 0           | 1.293713                | 0.977866  | 0.906725  |
| 3             | 1             | 0           | 1.527080                | 1.207499  | -0.861047 |
| 4             | 9             | 0           | -1.133064               | 0.032558  | 1.384616  |
| 5             | 9             | 0           | -1.219865               | 1.203460  | -0.579351 |
| 6             | 9             | 0           | -1.788171               | -1.022901 | -0.543875 |
| 7             | 9             | 0           | 0.478159                | -0.441446 | -0.305179 |
| 8             | 5             | 0           | -1.152841               | 0.007303  | 0.037733  |
| 9             | 6             | 0           | 2.832731                | -0.294657 | 0.032967  |
| 10            | 1             | 0           | 3.658145                | 0.393972  | 0.230180  |
| 11            | 1             | 0           | 2.793477                | -1.025394 | 0.841396  |
| 12            | 1             | 0           | 3.027107                | -0.800094 | -0.913609 |

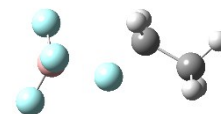

F<sub>3</sub>B-F-CH<sub>2</sub>CH<sub>2</sub>CH<sub>2</sub>CH<sub>3</sub> (in DCE)

Sum of electronic and zero-point Energies= -582.077281 (Hartree/particle)  
 Sum of electronic and thermal Free Energies= -582.116612 (Hartree/particle)  
 No imaginary frequencies

Standard orientation:

| Center Number | Atomic Number | Atomic Type | Coordinates (Angstroms) |           |           |
|---------------|---------------|-------------|-------------------------|-----------|-----------|
|               |               |             | X                       | Y         | Z         |
| 1             | 6             | 0           | 0.524752                | 0.420989  | -0.189527 |
| 2             | 1             | 0           | 0.305388                | 0.944916  | 0.739533  |
| 3             | 1             | 0           | 0.464624                | 1.089013  | -1.045836 |
| 4             | 9             | 0           | -2.076753               | 0.033126  | 1.424510  |
| 5             | 9             | 0           | -2.254950               | 1.208732  | -0.529763 |
| 6             | 9             | 0           | -2.907209               | -0.993279 | -0.451844 |
| 7             | 9             | 0           | -0.605702               | -0.500811 | -0.370793 |
| 8             | 5             | 0           | -2.193084               | 0.009929  | 0.082728  |
| 9             | 6             | 0           | 1.775538                | -0.403779 | -0.140901 |
| 10            | 1             | 0           | 1.707037                | -1.119000 | 0.683778  |

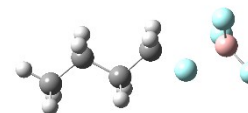

|    |   |   |          |           |           |
|----|---|---|----------|-----------|-----------|
| 11 | 1 | 0 | 1.875668 | -0.966871 | -1.073296 |
| 12 | 6 | 0 | 2.988306 | 0.509641  | 0.054827  |
| 13 | 1 | 0 | 2.865767 | 1.084037  | 0.978745  |
| 14 | 1 | 0 | 3.036558 | 1.234724  | -0.764044 |
| 15 | 6 | 0 | 4.286425 | -0.287588 | 0.114030  |
| 16 | 1 | 0 | 5.145935 | 0.369616  | 0.262631  |
| 17 | 1 | 0 | 4.268232 | -1.006315 | 0.937704  |
| 18 | 1 | 0 | 4.447610 | -0.845255 | -0.812414 |

### NCS-CH<sub>3</sub> (in DCE)

Sum of electronic and zero-point Energies= -530.860466 (Hartree/particle)

Sum of electronic and thermal Free Energies= -530.888550 (Hartree/particle)

No imaginary frequencies

Standard orientation:

| Center Number | Atomic Number | Atomic Type | Coordinates (Angstroms) |           |           |
|---------------|---------------|-------------|-------------------------|-----------|-----------|
|               |               |             | X                       | Y         | Z         |
| 1             | 6             | 0           | 1.465485                | 0.823704  | 0.000025  |
| 2             | 1             | 0           | 1.262975                | 1.401471  | 0.898477  |
| 3             | 1             | 0           | 1.262242                | 1.401786  | -0.898053 |
| 4             | 1             | 0           | 2.502747                | 0.491305  | -0.000632 |
| 5             | 16            | 0           | 0.470767                | -0.709464 | 0.000032  |
| 6             | 6             | 0           | -1.071067               | -0.004129 | -0.000161 |
| 7             | 7             | 0           | -2.132392               | 0.448487  | 0.000074  |

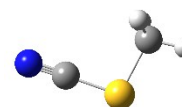

### Thiophenium salts

#### 1,2,5-tmt BF<sub>4</sub> · AgI (in DCE)

Sum of electronic and zero-point Energies= -1252.841667 (Hartree/particle)

Sum of electronic and thermal Free Energies= -1252.896029 (Hartree/particle)

No imaginary frequencies

Standard orientation:

| Center Number | Atomic Number | Atomic Type | Coordinates (Angstroms) |           |           |
|---------------|---------------|-------------|-------------------------|-----------|-----------|
|               |               |             | X                       | Y         | Z         |
| 1             | 6             | 0           | -3.732268               | -0.780861 | 0.202287  |
| 2             | 6             | 0           | -3.852173               | -1.168831 | -1.073927 |
| 3             | 6             | 0           | -2.913904               | -2.201814 | -1.503813 |
| 4             | 6             | 0           | -2.061286               | -2.629110 | -0.563285 |
| 5             | 16            | 0           | -2.459985               | -1.784900 | 0.968169  |
| 6             | 1             | 0           | -4.584057               | -0.729844 | -1.741738 |
| 7             | 1             | 0           | -2.890617               | -2.585533 | -2.516917 |
| 8             | 6             | 0           | -1.066876               | -0.622097 | 1.115240  |
| 9             | 1             | 0           | -0.206824               | -1.206075 | 1.441878  |
| 10            | 1             | 0           | -0.911777               | -0.166112 | 0.138891  |
| 11            | 1             | 0           | -1.339105               | 0.111238  | 1.872861  |
| 12            | 6             | 0           | -4.466032               | 0.219426  | 1.022028  |
| 13            | 1             | 0           | -3.780286               | 0.928063  | 1.491448  |
| 14            | 1             | 0           | -5.138916               | 0.780250  | 0.372503  |
| 15            | 1             | 0           | -5.053398               | -0.265813 | 1.805274  |
| 16            | 6             | 0           | -0.942495               | -3.608891 | -0.586926 |
| 17            | 1             | 0           | -0.846549               | -4.010742 | -1.596154 |
| 18            | 1             | 0           | 0.005426                | -3.134397 | -0.315390 |

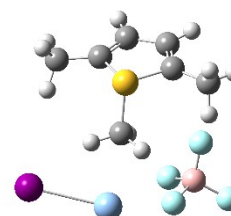

|    |    |   |           |           |           |
|----|----|---|-----------|-----------|-----------|
| 19 | 1  | 0 | -1.119683 | -4.435952 | 0.104317  |
| 20 | 53 | 0 | 2.902410  | -1.180019 | 0.047011  |
| 21 | 47 | 0 | 1.524580  | 1.251580  | -0.003547 |
| 22 | 9  | 0 | -0.288815 | 2.356121  | -1.323409 |
| 23 | 5  | 0 | -1.148963 | 2.741284  | -0.261354 |
| 24 | 9  | 0 | -0.432078 | 2.492117  | 0.942437  |
| 25 | 9  | 0 | -1.458025 | 4.089971  | -0.360061 |
| 26 | 9  | 0 | -2.299130 | 1.954754  | -0.285125 |

### 1,2,5-tmt BF<sub>4</sub> (in DCE)

Sum of electronic and zero-point Energies= -1095.739146 (Hartree/particle)

Sum of electronic and thermal Free Energies= -1095.783723 (Hartree/particle)

No imaginary frequencies

Standard orientation:

| Center<br>Number | Atomic<br>Number | Atomic<br>Type | Coordinates (Angstroms) |           |           |
|------------------|------------------|----------------|-------------------------|-----------|-----------|
|                  |                  |                | X                       | Y         | Z         |
| 1                | 6                | 0              | -2.910721               | -0.450690 | -0.185946 |
| 2                | 6                | 0              | -3.347975               | 0.798920  | 0.019227  |
| 3                | 6                | 0              | -2.299420               | 1.808105  | 0.127657  |
| 4                | 6                | 0              | -1.046053               | 1.349341  | 0.004555  |
| 5                | 16               | 0              | -1.129907               | -0.404757 | -0.362663 |
| 6                | 1                | 0              | -4.401432               | 1.035225  | 0.113460  |
| 7                | 1                | 0              | -2.510556               | 2.854734  | 0.313553  |
| 8                | 6                | 0              | -0.576329               | -1.155765 | 1.197020  |
| 9                | 1                | 0              | 0.485575                | -0.934587 | 1.287939  |
| 10               | 1                | 0              | -1.156815               | -0.728747 | 2.012459  |
| 11               | 1                | 0              | -0.733004               | -2.229643 | 1.106262  |
| 12               | 6                | 0              | -3.628024               | -1.747262 | -0.323452 |
| 13               | 1                | 0              | -3.277123               | -2.474477 | 0.414008  |
| 14               | 1                | 0              | -4.694092               | -1.583146 | -0.163155 |
| 15               | 1                | 0              | -3.486536               | -2.179556 | -1.316698 |
| 16               | 6                | 0              | 0.271400                | 2.034134  | 0.081654  |
| 17               | 1                | 0              | 0.101333                | 3.085177  | 0.319014  |
| 18               | 1                | 0              | 0.902247                | 1.597202  | 0.859756  |
| 19               | 1                | 0              | 0.811842                | 1.965286  | -0.863218 |
| 20               | 9                | 0              | 3.345405                | 1.024830  | -0.476422 |
| 21               | 9                | 0              | 2.607135                | -0.243970 | 1.288923  |
| 22               | 9                | 0              | 3.816171                | -1.220504 | -0.402187 |
| 23               | 9                | 0              | 1.664740                | -0.512903 | -0.780337 |
| 24               | 5                | 0              | 2.871748                | -0.235828 | -0.094973 |

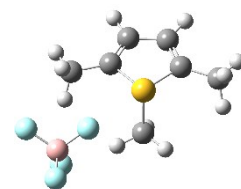

### 1,2,5-tmt PF<sub>6</sub> (in DCE)

Sum of electronic and zero-point Energies= -1611.862309 (Hartree/particle)

Sum of electronic and thermal Free Energies= -1611.908624 (Hartree/particle)

No imaginary frequencies

Standard orientation:

| Center<br>Number | Atomic<br>Number | Atomic<br>Type | Coordinates (Angstroms) |           |           |
|------------------|------------------|----------------|-------------------------|-----------|-----------|
|                  |                  |                | X                       | Y         | Z         |
| 1                | 6                | 0              | -3.486296               | -0.477425 | -0.190664 |
| 2                | 6                | 0              | -3.951226               | 0.763381  | 0.006947  |
| 3                | 6                | 0              | -2.924942               | 1.794742  | 0.119704  |
| 4                | 6                | 0              | -1.661327               | 1.362032  | 0.007513  |
| 5                | 16               | 0              | -1.705562               | -0.394638 | -0.354279 |

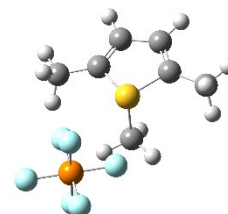

|    |    |   |           |           |           |
|----|----|---|-----------|-----------|-----------|
| 6  | 1  | 0 | -5.010092 | 0.977792  | 0.092524  |
| 7  | 1  | 0 | -3.159403 | 2.837305  | 0.300420  |
| 8  | 6  | 0 | -1.148067 | -1.128713 | 1.212056  |
| 9  | 1  | 0 | -0.091756 | -0.884958 | 1.310114  |
| 10 | 1  | 0 | -1.743503 | -0.711319 | 2.021678  |
| 11 | 1  | 0 | -1.281468 | -2.205941 | 1.123831  |
| 12 | 6  | 0 | -4.175157 | -1.789238 | -0.329041 |
| 13 | 1  | 0 | -3.814611 | -2.506488 | 0.413509  |
| 14 | 1  | 0 | -5.245611 | -1.647049 | -0.177248 |
| 15 | 1  | 0 | -4.017163 | -2.221722 | -1.319713 |
| 16 | 6  | 0 | -0.359163 | 2.074625  | 0.092058  |
| 17 | 1  | 0 | -0.553044 | 3.122633  | 0.324527  |
| 18 | 1  | 0 | 0.274858  | 1.653612  | 0.876333  |
| 19 | 1  | 0 | 0.189690  | 2.014052  | -0.848523 |
| 20 | 9  | 0 | 1.480711  | 1.067922  | 0.071323  |
| 21 | 9  | 0 | 1.375086  | -0.847672 | 0.834569  |
| 22 | 9  | 0 | 3.098371  | -1.349371 | -0.186117 |
| 23 | 9  | 0 | 1.488804  | -0.554252 | -1.206058 |
| 24 | 9  | 0 | 3.203986  | 0.566222  | -0.949367 |
| 25 | 9  | 0 | 3.090273  | 0.272793  | 1.091265  |
| 26 | 15 | 0 | 2.289539  | -0.140726 | -0.057398 |

1,2,5-tmt SbF<sub>6</sub> (in DCE)

Sum of electronic and zero-point Energies= -1275.867197 (Hartree/particle)

Sum of electronic and thermal Free Energies= -1275.917076 (Hartree/particle)

No imaginary frequencies

Standard orientation:

| Center<br>Number | Atomic<br>Number | Atomic<br>Type | Coordinates (Angstroms) |           |           |
|------------------|------------------|----------------|-------------------------|-----------|-----------|
|                  |                  |                | X                       | Y         | Z         |
| 1                | 6                | 0              | -3.538787               | -1.116613 | -0.217389 |
| 2                | 6                | 0              | -4.589063               | -0.297233 | -0.363437 |
| 3                | 6                | 0              | -4.273050               | 1.126852  | -0.302997 |
| 4                | 6                | 0              | -2.978126               | 1.415991  | -0.111283 |
| 5                | 16               | 0              | -2.058038               | -0.119811 | -0.104562 |
| 6                | 1                | 0              | -5.597865               | -0.669085 | -0.499246 |
| 7                | 1                | 0              | -5.028624               | 1.898824  | -0.391767 |
| 8                | 6                | 0              | -1.616609               | -0.296131 | 1.649511  |
| 9                | 1                | 0              | -0.883893               | 0.478380  | 1.867676  |
| 10               | 1                | 0              | -2.519365               | -0.178671 | 2.245717  |
| 11               | 1                | 0              | -1.170927               | -1.281677 | 1.767998  |
| 12               | 6                | 0              | -3.423684               | -2.599703 | -0.184186 |
| 13               | 1                | 0              | -3.008328               | -2.942924 | 0.767661  |
| 14               | 1                | 0              | -4.415212               | -3.037723 | -0.303821 |
| 15               | 1                | 0              | -2.779402               | -2.968860 | -0.985367 |
| 16               | 6                | 0              | -2.255665               | 2.707561  | 0.035656  |
| 17               | 1                | 0              | -2.981386               | 3.521131  | 0.001394  |
| 18               | 1                | 0              | -1.723676               | 2.757636  | 0.989249  |
| 19               | 1                | 0              | -1.526283               | 2.850430  | -0.763605 |
| 20               | 9                | 0              | 0.472268                | 1.195773  | -0.032483 |
| 21               | 9                | 0              | 1.947071                | -0.003518 | 1.838495  |
| 22               | 9                | 0              | 3.324373                | -1.316429 | -0.073625 |
| 23               | 9                | 0              | 0.631802                | -1.436830 | 0.010590  |
| 24               | 9                | 0              | 1.843621                | -0.065562 | -1.956660 |
| 25               | 9                | 0              | 3.164559                | 1.391480  | -0.111900 |
| 26               | 51               | 0              | 1.924710                | -0.039981 | -0.061331 |

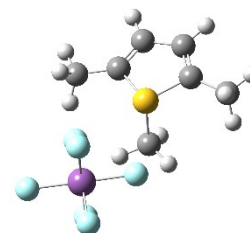

1,3-dmt BF<sub>4</sub> (in DCE)

Sum of electronic and zero-point Energies= -1056.456481 (Hartree/particle)  
 Sum of electronic and thermal Free Energies= -1056.498774 (Hartree/particle)  
 No imaginary frequencies

Standard orientation:

| Center Number | Atomic Number | Atomic Type | Coordinates (Angstroms) |           |           |
|---------------|---------------|-------------|-------------------------|-----------|-----------|
|               |               |             | X                       | Y         | Z         |
| 1             | 6             | 0           | -2.589139               | -0.841171 | -0.307616 |
| 2             | 6             | 0           | -2.994948               | 0.392248  | 0.028013  |
| 3             | 6             | 0           | -1.876500               | 1.342595  | 0.129471  |
| 4             | 6             | 0           | -0.673303               | 0.822661  | -0.123915 |
| 5             | 16            | 0           | -0.847367               | -0.874616 | -0.611395 |
| 6             | 1             | 0           | -2.025428               | 2.383233  | 0.393865  |
| 7             | 6             | 0           | -0.238504               | -1.829803 | 0.815855  |
| 8             | 1             | 0           | 0.844704                | -1.841743 | 0.745203  |
| 9             | 1             | 0           | -0.586701               | -1.348892 | 1.727248  |
| 10            | 1             | 0           | -0.649291               | -2.832362 | 0.705414  |
| 11            | 9             | 0           | 2.592391                | 1.630952  | -0.324609 |
| 12            | 9             | 0           | 2.169397                | 0.087631  | 1.314422  |
| 13            | 9             | 0           | 4.022376                | -0.145495 | -0.027827 |
| 14            | 9             | 0           | 1.916783                | -0.485016 | -0.885752 |
| 15            | 5             | 0           | 2.694787                | 0.275499  | 0.023487  |
| 16            | 1             | 0           | 0.303104                | 1.283030  | -0.153096 |
| 17            | 1             | 0           | -3.163674               | -1.743105 | -0.466650 |
| 18            | 6             | 0           | -4.404602               | 0.804914  | 0.285912  |
| 19            | 1             | 0           | -4.493362               | 1.229325  | 1.289128  |
| 20            | 1             | 0           | -4.701549               | 1.581985  | -0.423117 |
| 21            | 1             | 0           | -5.090417               | -0.036412 | 0.194466  |

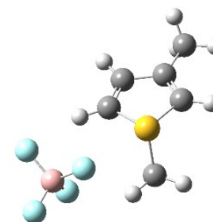1,3-dmt PF<sub>6</sub> (in DCE)

Sum of electronic and zero-point Energies= -1572.577806 (Hartree/particle)  
 Sum of electronic and thermal Free Energies= -1572.622495 (Hartree/particle)  
 No imaginary frequencies

Standard orientation:

| Center Number | Atomic Number | Atomic Type | Coordinates (Angstroms) |           |           |
|---------------|---------------|-------------|-------------------------|-----------|-----------|
|               |               |             | X                       | Y         | Z         |
| 1             | 6             | 0           | -3.155458               | -0.741457 | -0.623253 |
| 2             | 6             | 0           | -3.782335               | 0.336811  | -0.128932 |
| 3             | 6             | 0           | -2.864847               | 1.252441  | 0.568179  |
| 4             | 6             | 0           | -1.588991               | 0.860433  | 0.582481  |
| 5             | 16            | 0           | -1.410850               | -0.631149 | -0.359755 |
| 6             | 1             | 0           | -3.208186               | 2.167514  | 1.036802  |
| 7             | 6             | 0           | -1.115976               | -1.898625 | 0.914273  |
| 8             | 1             | 0           | -0.108583               | -1.737765 | 1.288664  |
| 9             | 1             | 0           | -1.867241               | -1.787707 | 1.693128  |
| 10            | 1             | 0           | -1.189166               | -2.862324 | 0.413194  |
| 11            | 9             | 0           | 2.954090                | 1.520590  | 0.466214  |
| 12            | 9             | 0           | 1.320815                | 0.104940  | 1.261115  |
| 13            | 9             | 0           | 3.207224                | 0.179533  | -1.389623 |
| 14            | 9             | 0           | 1.130524                | 1.005687  | -0.834357 |
| 15            | 15            | 0           | 2.281586                | 0.146304  | -0.063901 |
| 16            | 1             | 0           | -0.705485               | 1.319007  | 1.000388  |
| 17            | 1             | 0           | -3.545691               | -1.577631 | -1.186775 |
| 18            | 6             | 0           | -5.243693               | 0.615458  | -0.238216 |
| 19            | 1             | 0           | -5.676802               | 0.737849  | 0.757842  |
| 20            | 1             | 0           | -5.406769               | 1.550068  | -0.780897 |

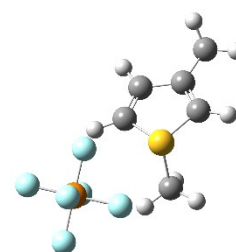

|    |   |   |           |           |           |
|----|---|---|-----------|-----------|-----------|
| 21 | 1 | 0 | -5.764294 | -0.189201 | -0.756021 |
| 22 | 9 | 0 | 3.402611  | -0.719451 | 0.720348  |
| 23 | 9 | 0 | 1.576938  | -1.232007 | -0.579133 |

1,3-dmt SbF<sub>6</sub> (in DCE)

Sum of electronic and zero-point Energies= -1236.544097 (Hartree/particle)  
 Sum of electronic and thermal Free Energies= -1236.631132 (Hartree/particle)  
 No imaginary frequencies

Standard orientation:

| Center Number | Atomic Number | Atomic Type | Coordinates (Angstroms) |           |           |
|---------------|---------------|-------------|-------------------------|-----------|-----------|
|               |               |             | X                       | Y         | Z         |
| 1             | 6             | 0           | -3.910523               | 0.222772  | 0.748468  |
| 2             | 6             | 0           | -3.190065               | 1.166693  | 0.075988  |
| 3             | 6             | 0           | -2.653280               | 0.643148  | -1.148770 |
| 4             | 6             | 0           | -2.981398               | -0.659193 | -1.365489 |
| 5             | 16            | 0           | -3.954902               | -1.289256 | -0.088691 |
| 6             | 1             | 0           | -2.041832               | 1.225537  | -1.828192 |
| 7             | 6             | 0           | -0.791981               | -1.468078 | 1.149288  |
| 8             | 1             | 0           | -0.768374               | -2.243698 | 0.392128  |
| 9             | 1             | 0           | -1.329828               | -0.572557 | 0.857034  |
| 10            | 1             | 0           | -1.051026               | -1.828907 | 2.138205  |
| 11            | 9             | 0           | 2.871185                | 0.315235  | 1.442251  |
| 12            | 9             | 0           | 0.451507                | -0.455954 | -1.275188 |
| 13            | 9             | 0           | 0.613187                | -1.033124 | 1.300660  |
| 14            | 9             | 0           | 2.629266                | -1.599252 | -0.352168 |
| 15            | 9             | 0           | 2.851660                | 1.043238  | -1.287053 |
| 16            | 9             | 0           | 0.702795                | 1.484837  | 0.469733  |
| 17            | 1             | 0           | -4.427255               | 0.329923  | 1.692608  |
| 18            | 1             | 0           | -2.705519               | -1.291699 | -2.197711 |
| 19            | 6             | 0           | -2.967335               | 2.575430  | 0.541428  |
| 20            | 1             | 0           | -3.443488               | 2.753141  | 1.506623  |
| 21            | 1             | 0           | -1.899656               | 2.786497  | 0.642119  |
| 22            | 1             | 0           | -3.374104               | 3.291654  | -0.177274 |
| 23            | 51            | 0           | 1.808051                | 0.068603  | -0.084237 |

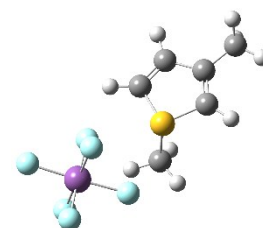

2e1-mt BF<sub>4</sub> (in DCE)

Sum of electronic and zero-point Energies= -1095.730977 (Hartree/particle)  
 Sum of electronic and thermal Free Energies= -1095.775234 (Hartree/particle)  
 No imaginary frequencies

Standard orientation:

| Center Number | Atomic Number | Atomic Type | Coordinates (Angstroms) |           |           |
|---------------|---------------|-------------|-------------------------|-----------|-----------|
|               |               |             | X                       | Y         | Z         |
| 1             | 6             | 0           | -2.448367               | 0.370415  | 0.153342  |
| 2             | 6             | 0           | -2.369138               | 1.706023  | 0.228062  |
| 3             | 6             | 0           | -1.032486               | 2.250204  | 0.004142  |
| 4             | 6             | 0           | -0.090262               | 1.329448  | -0.226624 |
| 5             | 16            | 0           | -0.832636               | -0.276268 | -0.294518 |
| 6             | 1             | 0           | -3.227803               | 2.326307  | 0.455913  |
| 7             | 1             | 0           | -0.817687               | 3.311457  | 0.025148  |
| 8             | 6             | 0           | -0.371741               | -1.087628 | 1.268394  |
| 9             | 1             | 0           | 0.648808                | -1.437727 | 1.152475  |
| 10            | 1             | 0           | -0.471063               | -0.365169 | 2.075731  |
| 11            | 1             | 0           | -1.059198               | -1.924842 | 1.385892  |
| 12            | 6             | 0           | -3.588029               | -0.570962 | 0.359151  |

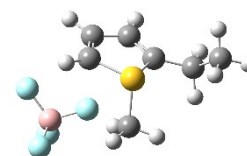



|    |   |   |           |           |           |
|----|---|---|-----------|-----------|-----------|
| 13 | 1 | 0 | -3.379646 | -1.203149 | 1.230097  |
| 14 | 1 | 0 | -4.458695 | 0.037907  | 0.613392  |
| 15 | 9 | 0 | 3.206857  | 1.005180  | -0.759513 |
| 16 | 9 | 0 | 2.500414  | 0.085764  | 1.216032  |
| 17 | 9 | 0 | 4.070987  | -1.007820 | -0.058875 |
| 18 | 9 | 0 | 1.888319  | -0.869155 | -0.770572 |
| 19 | 5 | 0 | 2.936235  | -0.198350 | -0.090221 |
| 20 | 1 | 0 | 0.958542  | 1.437811  | -0.458892 |
| 21 | 6 | 0 | -3.879264 | -1.444921 | -0.861786 |
| 22 | 1 | 0 | -3.045095 | -2.113954 | -1.089290 |
| 23 | 1 | 0 | -4.756759 | -2.065698 | -0.674449 |
| 24 | 1 | 0 | -4.073890 | -0.832110 | -1.744347 |

2e1-mt PF<sub>6</sub> (in DCE)

Sum of electronic and zero-point Energies= -1611.853062 (Hartree/particle)

Sum of electronic and thermal Free Energies= -1611.900123 (Hartree/particle)

No imaginary frequencies

Standard orientation:

| Center<br>Number | Atomic<br>Number | Atomic<br>Type | Coordinates (Angstroms) |           |           |
|------------------|------------------|----------------|-------------------------|-----------|-----------|
|                  |                  |                | X                       | Y         | Z         |
| 1                | 6                | 0              | -3.124662               | 0.079409  | -0.080879 |
| 2                | 6                | 0              | -3.510989               | 1.322447  | -0.401192 |
| 3                | 6                | 0              | -2.437308               | 2.313148  | -0.405653 |
| 4                | 6                | 0              | -1.234961               | 1.825197  | -0.079784 |
| 5                | 16               | 0              | -1.341957               | 0.071942  | 0.123536  |
| 6                | 1                | 0              | -4.542778               | 1.571279  | -0.619358 |
| 7                | 1                | 0              | -2.601230               | 3.356027  | -0.647427 |
| 8                | 6                | 0              | -1.187104               | -0.206831 | 1.914596  |
| 9                | 1                | 0              | -0.155722               | 0.015181  | 2.175328  |
| 10               | 1                | 0              | -1.889098               | 0.443261  | 2.432607  |
| 11               | 1                | 0              | -1.403710               | -1.261168 | 2.084119  |
| 12               | 6                | 0              | -3.890773               | -1.189459 | 0.093379  |
| 13               | 1                | 0              | -3.860804               | -1.481011 | 1.149507  |
| 14               | 1                | 0              | -4.933794               | -0.964023 | -0.141542 |
| 15               | 9                | 0              | 1.425715                | 0.178754  | -1.389553 |
| 16               | 9                | 0              | 1.461434                | 0.904750  | 0.784277  |
| 17               | 9                | 0              | 3.306609                | -0.408725 | 1.192140  |
| 18               | 9                | 0              | 1.390961                | -1.340074 | 0.333978  |
| 19               | 1                | 0              | -0.266000               | 2.297672  | -0.024502 |
| 20               | 6                | 0              | -3.375000               | -2.335743 | -0.777485 |
| 21               | 1                | 0              | -2.357142               | -2.626725 | -0.503102 |
| 22               | 1                | 0              | -4.010894               | -3.213508 | -0.653221 |
| 23               | 1                | 0              | -3.374911               | -2.057279 | -1.833289 |
| 24               | 9                | 0              | 3.267963                | -1.143308 | -0.990263 |
| 25               | 9                | 0              | 3.340495                | 1.112320  | -0.529017 |
| 26               | 15               | 0              | 2.379573                | -0.120882 | -0.105843 |

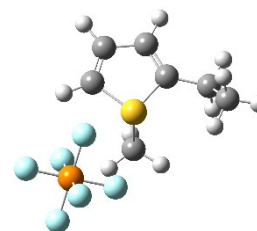

2e1-mt SbF<sub>6</sub> (in DCE)

Sum of electronic and zero-point Energies= -1275.858472 (Hartree/particle)

Sum of electronic and thermal Free Energies= -1275.908692 (Hartree/particle)

No imaginary frequencies

Standard orientation:

| Center<br>Number | Atomic<br>Number | Atomic<br>Type | Coordinates (Angstroms) |   |   |
|------------------|------------------|----------------|-------------------------|---|---|
|                  |                  |                | X                       | Y | Z |

|    |    |   |           |           |           |
|----|----|---|-----------|-----------|-----------|
| 1  | 6  | 0 | 3.694273  | 0.166297  | -0.047246 |
| 2  | 6  | 0 | 4.388340  | -0.933740 | -0.372044 |
| 3  | 6  | 0 | 3.586217  | -2.151129 | -0.478062 |
| 4  | 6  | 0 | 2.282899  | -1.974115 | -0.233253 |
| 5  | 16 | 0 | 1.955196  | -0.258578 | 0.029725  |
| 6  | 1  | 0 | 5.460757  | -0.921255 | -0.525222 |
| 7  | 1  | 0 | 4.011880  | -3.114675 | -0.729753 |
| 8  | 6  | 0 | 1.637170  | -0.136649 | 1.816619  |
| 9  | 1  | 0 | 0.677247  | -0.613251 | 1.999739  |
| 10 | 1  | 0 | 2.446041  | -0.636590 | 2.345617  |
| 11 | 1  | 0 | 1.587621  | 0.925085  | 2.052571  |
| 12 | 6  | 0 | 4.111932  | 1.575545  | 0.213196  |
| 13 | 1  | 0 | 3.987403  | 1.789952  | 1.281148  |
| 14 | 1  | 0 | 5.181504  | 1.636793  | -0.000096 |
| 15 | 9  | 0 | -0.610137 | -1.307352 | 0.018535  |
| 16 | 9  | 0 | -2.359602 | -0.294025 | 1.762520  |
| 17 | 9  | 0 | -3.250006 | 1.426288  | -0.115325 |
| 18 | 9  | 0 | -0.614444 | 1.280493  | 0.487989  |
| 19 | 9  | 0 | -1.478993 | 0.360370  | -1.868586 |
| 20 | 9  | 0 | -3.233453 | -1.246182 | -0.598647 |
| 21 | 51 | 0 | -1.956467 | 0.044920  | -0.060111 |
| 22 | 1  | 0 | 1.452007  | -2.663497 | -0.257121 |
| 23 | 6  | 0 | 3.332832  | 2.599002  | -0.614154 |
| 24 | 1  | 0 | 2.273792  | 2.618734  | -0.340029 |
| 25 | 1  | 0 | 3.733238  | 3.599492  | -0.444204 |
| 26 | 1  | 0 | 3.402937  | 2.377956  | -1.681306 |

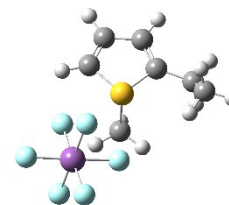

#### 1-mbt BF<sub>4</sub> (in DCE)

Sum of electronic and zero-point Energies= -1170.759288 (Hartree/particle)  
 Sum of electronic and thermal Free Energies= -1170.803481 (Hartree/particle)  
 No imaginary frequencies

Standard orientation:

| Center Number | Atomic Number | Atomic Type | Coordinates (Angstroms) |           |           |
|---------------|---------------|-------------|-------------------------|-----------|-----------|
|               |               |             | X                       | Y         | Z         |
| 1             | 6             | 0           | 2.390587                | -0.067083 | -0.356064 |
| 2             | 6             | 0           | 1.067937                | -0.139721 | 0.095197  |
| 3             | 6             | 0           | 0.485213                | -1.303919 | 0.560469  |
| 4             | 6             | 0           | 1.284938                | -2.446727 | 0.572640  |
| 5             | 6             | 0           | 2.603274                | -2.406655 | 0.118876  |
| 6             | 6             | 0           | 3.165874                | -1.223361 | -0.350419 |
| 7             | 6             | 0           | 2.776484                | 1.281846  | -0.766728 |
| 8             | 6             | 0           | 1.813100                | 2.193788  | -0.621881 |
| 9             | 1             | 0           | -0.541738               | -1.333895 | 0.900209  |
| 10            | 1             | 0           | 0.866777                | -3.378759 | 0.934276  |
| 11            | 1             | 0           | 3.198375                | -3.312529 | 0.130020  |
| 12            | 1             | 0           | 4.190237                | -1.193487 | -0.703931 |
| 13            | 1             | 0           | 3.763602                | 1.517245  | -1.146761 |
| 14            | 1             | 0           | 1.814619                | 3.250345  | -0.850325 |
| 15            | 16            | 0           | 0.292266                | 1.459945  | -0.052354 |
| 16            | 6             | 0           | 0.228615                | 2.027300  | 1.675034  |
| 17            | 1             | 0           | 1.207389                | 1.887025  | 2.128386  |
| 18            | 1             | 0           | -0.542346               | 1.435147  | 2.162522  |
| 19            | 1             | 0           | -0.058697               | 3.077621  | 1.649857  |
| 20            | 9             | 0           | -2.137859               | 0.392631  | 0.798711  |
| 21            | 9             | 0           | -1.914726               | -0.349494 | -1.357595 |
| 22            | 9             | 0           | -3.969588               | 0.332669  | -0.587672 |
| 23            | 9             | 0           | -3.041843               | -1.622143 | 0.183194  |
| 24            | 5             | 0           | -2.778892               | -0.316723 | -0.251812 |

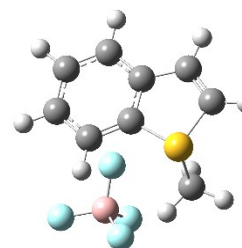

-----

1-mbt PF<sub>6</sub> (in DCE)

Sum of electronic and zero-point Energies= -1686.881335 (Hartree/particle)  
 Sum of electronic and thermal Free Energies= -1686.927946 (Hartree/particle)  
 No imaginary frequencies

Standard orientation:

| Center Number | Atomic Number | Atomic Type | Coordinates (Angstroms) |           |           |
|---------------|---------------|-------------|-------------------------|-----------|-----------|
|               |               |             | X                       | Y         | Z         |
| 1             | 6             | 0           | 3.395596                | -0.037103 | -0.069417 |
| 2             | 6             | 0           | 2.004712                | -0.164216 | -0.155088 |
| 3             | 6             | 0           | 1.341958                | -1.375518 | -0.086570 |
| 4             | 6             | 0           | 2.129549                | -2.512469 | 0.092046  |
| 5             | 6             | 0           | 3.518495                | -2.417491 | 0.177959  |
| 6             | 6             | 0           | 4.162957                | -1.186157 | 0.095640  |
| 7             | 6             | 0           | 3.843090                | 1.351672  | -0.165211 |
| 8             | 6             | 0           | 2.855757                | 2.238739  | -0.304395 |
| 9             | 1             | 0           | 0.264627                | -1.444929 | -0.167710 |
| 10            | 1             | 0           | 1.649410                | -3.481645 | 0.157735  |
| 11            | 1             | 0           | 4.105434                | -3.319266 | 0.309053  |
| 12            | 1             | 0           | 5.243027                | -1.115977 | 0.157984  |
| 13            | 1             | 0           | 4.888491                | 1.633711  | -0.121502 |
| 14            | 1             | 0           | 2.891189                | 3.314166  | -0.407645 |
| 15            | 16            | 0           | 1.266384                | 1.437656  | -0.410494 |
| 16            | 6             | 0           | 0.539615                | 1.803719  | 1.218244  |
| 17            | 1             | 0           | 1.320198                | 1.720710  | 1.971561  |
| 18            | 1             | 0           | -0.253596               | 1.076938  | 1.376614  |
| 19            | 1             | 0           | 0.132413                | 2.812094  | 1.162302  |
| 20            | 9             | 0           | -1.802853               | -0.662489 | 1.245552  |
| 21            | 9             | 0           | -1.272591               | 0.333013  | -0.752065 |
| 22            | 9             | 0           | -4.036240               | -0.634563 | 0.678567  |
| 23            | 9             | 0           | -2.495452               | -1.612579 | -0.725799 |
| 24            | 9             | 0           | -3.501741               | 0.364474  | -1.327376 |
| 25            | 9             | 0           | -2.805393               | 1.311934  | 0.648216  |
| 26            | 15            | 0           | -2.668352               | -0.153563 | -0.039572 |

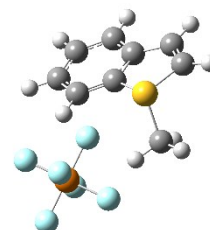

1-mbt SbF<sub>6</sub> (in DCE)

Sum of electronic and zero-point Energies= -1350.886436 (Hartree/particle)  
 Sum of electronic and thermal Free Energies= -1350.936924 (Hartree/particle)  
 No imaginary frequencies

Standard orientation:

| Center Number | Atomic Number | Atomic Type | Coordinates (Angstroms) |           |           |
|---------------|---------------|-------------|-------------------------|-----------|-----------|
|               |               |             | X                       | Y         | Z         |
| 1             | 6             | 0           | -4.018860               | 0.149584  | -0.085543 |
| 2             | 6             | 0           | -2.620655               | 0.168347  | -0.151376 |
| 3             | 6             | 0           | -1.868038               | 1.324128  | -0.061901 |
| 4             | 6             | 0           | -2.567503               | 2.517189  | 0.118274  |
| 5             | 6             | 0           | -3.960332               | 2.530198  | 0.186811  |
| 6             | 6             | 0           | -4.696412               | 1.353238  | 0.082699  |
| 7             | 6             | 0           | -4.572621               | -1.198981 | -0.197047 |
| 8             | 6             | 0           | -3.654874               | -2.158798 | -0.327996 |
| 9             | 1             | 0           | -0.788276               | 1.316413  | -0.130826 |
| 10            | 1             | 0           | -2.013677               | 3.445138  | 0.198568  |

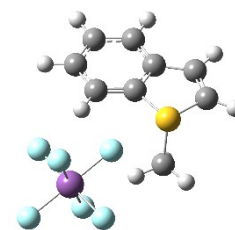

|    |    |   |           |           |           |
|----|----|---|-----------|-----------|-----------|
| 11 | 1  | 0 | -4.477904 | 3.473015  | 0.320906  |
| 12 | 1  | 0 | -5.779343 | 1.365916  | 0.130629  |
| 13 | 1  | 0 | -5.637041 | -1.399932 | -0.169947 |
| 14 | 1  | 0 | -3.776178 | -3.227289 | -0.439076 |
| 15 | 16 | 0 | -2.005885 | -1.486790 | -0.407750 |
| 16 | 6  | 0 | -1.341069 | -1.927395 | 1.228447  |
| 17 | 1  | 0 | -2.088438 | -1.691982 | 1.982882  |
| 18 | 1  | 0 | -0.427730 | -1.351816 | 1.361476  |
| 19 | 1  | 0 | -1.117864 | -2.993378 | 1.198959  |
| 20 | 9  | 0 | 1.606898  | -0.367621 | 1.707539  |
| 21 | 9  | 0 | 0.581946  | -0.563266 | -0.709362 |
| 22 | 9  | 0 | 3.855297  | 0.753968  | 0.707187  |
| 23 | 9  | 0 | 1.429282  | 1.788361  | 0.135426  |
| 24 | 9  | 0 | 2.814249  | 0.506564  | -1.784589 |
| 25 | 9  | 0 | 2.985753  | -1.655802 | -0.195933 |
| 26 | 51 | 0 | 2.245921  | 0.081327  | -0.027965 |

1,2-dmbt BF<sub>4</sub> (in DCE)

Sum of electronic and zero-point Energies= -1210.043242 (Hartree/particle)  
Sum of electronic and thermal Free Energies= -1210.089186 (Hartree/particle)  
No imaginary frequencies

Standard orientation:

| Center<br>Number | Atomic<br>Number | Atomic<br>Type | Coordinates (Angstroms) |           |           |
|------------------|------------------|----------------|-------------------------|-----------|-----------|
|                  |                  |                | X                       | Y         | Z         |
| 1                | 6                | 0              | -2.179422               | 0.754164  | -0.274074 |
| 2                | 6                | 0              | -0.848219               | 0.583244  | 0.122519  |
| 3                | 6                | 0              | -0.010486               | 1.631208  | 0.457238  |
| 4                | 6                | 0              | -0.552335               | 2.914984  | 0.399518  |
| 5                | 6                | 0              | -1.873994               | 3.116723  | 0.002526  |
| 6                | 6                | 0              | -2.695099               | 2.045586  | -0.339014 |
| 7                | 6                | 0              | -2.860168               | -0.508404 | -0.548477 |
| 8                | 6                | 0              | -2.118371               | -1.605938 | -0.367638 |
| 9                | 1                | 0              | 1.017728                | 1.469123  | 0.753883  |
| 10               | 1                | 0              | 0.069413                | 3.763303  | 0.660206  |
| 11               | 1                | 0              | -2.268305               | 4.125410  | -0.042368 |
| 12               | 1                | 0              | -3.721804               | 2.207215  | -0.647660 |
| 13               | 1                | 0              | -3.897077               | -0.555321 | -0.862428 |
| 14               | 16               | 0              | -0.433084               | -1.148380 | 0.081889  |
| 15               | 6                | 0              | -0.402889               | -1.596986 | 1.842857  |
| 16               | 1                | 0              | -1.323798               | -1.254481 | 2.310226  |
| 17               | 1                | 0              | 0.476276                | -1.117119 | 2.266411  |
| 18               | 1                | 0              | -0.299454               | -2.680139 | 1.892233  |
| 19               | 9                | 0              | 2.209540                | -0.600104 | 0.818222  |
| 20               | 9                | 0              | 2.093766                | 0.025612  | -1.381707 |
| 21               | 9                | 0              | 4.019239                | -0.922109 | -0.561318 |
| 22               | 9                | 0              | 3.416828                | 1.201364  | 0.078200  |
| 23               | 5                | 0              | 2.948413                | -0.072369 | -0.272821 |
| 24               | 6                | 0              | -2.444522               | -3.051124 | -0.503008 |
| 25               | 1                | 0              | -2.334867               | -3.570960 | 0.453152  |
| 26               | 1                | 0              | -3.478428               | -3.154408 | -0.833610 |
| 27               | 1                | 0              | -1.793744               | -3.540307 | -1.231431 |

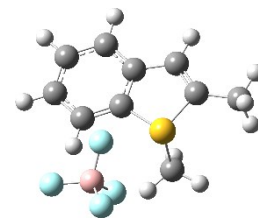

1,2-dmbt PF<sub>6</sub> (in DCE)

Sum of electronic and zero-point Energies= -1726.166388 (Hartree/particle)  
Sum of electronic and thermal Free Energies= -1726.214163 (Hartree/particle)

No imaginary frequencies

Standard orientation:

| Center Number | Atomic Number | Atomic Type | Coordinates (Angstroms) |           |           |
|---------------|---------------|-------------|-------------------------|-----------|-----------|
|               |               |             | X                       | Y         | Z         |
| 1             | 6             | 0           | -3.291824               | 0.099713  | -0.190802 |
| 2             | 6             | 0           | -1.973214               | 0.535339  | -0.017496 |
| 3             | 6             | 0           | -1.619162               | 1.863506  | 0.132801  |
| 4             | 6             | 0           | -2.655806               | 2.796359  | 0.123216  |
| 5             | 6             | 0           | -3.979563               | 2.392667  | -0.050110 |
| 6             | 6             | 0           | -4.308967               | 1.049547  | -0.211853 |
| 7             | 6             | 0           | -3.399596               | -1.351927 | -0.314465 |
| 8             | 6             | 0           | -2.243249               | -2.018743 | -0.237648 |
| 9             | 1             | 0           | -0.587268               | 2.168956  | 0.251747  |
| 10            | 1             | 0           | -2.423054               | 3.847632  | 0.244884  |
| 11            | 1             | 0           | -4.766229               | 3.138644  | -0.062109 |
| 12            | 1             | 0           | -5.339180               | 0.741470  | -0.350068 |
| 13            | 1             | 0           | -4.350404               | -1.856066 | -0.447783 |
| 14            | 16            | 0           | -0.869441               | -0.860261 | -0.078176 |
| 15            | 6             | 0           | -0.413086               | -1.086974 | 1.666402  |
| 16            | 1             | 0           | -1.322074               | -1.092126 | 2.264445  |
| 17            | 1             | 0           | 0.242420                | -0.258787 | 1.926389  |
| 18            | 1             | 0           | 0.126303                | -2.029853 | 1.734828  |
| 19            | 9             | 0           | 2.135553                | -1.228282 | 0.186085  |
| 20            | 9             | 0           | 1.332398                | 0.921973  | 0.098809  |
| 21            | 9             | 0           | 2.487542                | 0.050521  | -1.686344 |
| 22            | 9             | 0           | 3.446655                | 1.689646  | -0.390870 |
| 23            | 6             | 0           | -1.932949               | -3.472734 | -0.284393 |
| 24            | 1             | 0           | -1.424104               | -3.797238 | 0.627875  |
| 25            | 1             | 0           | -2.863757               | -4.032800 | -0.377787 |
| 26            | 1             | 0           | -1.290511               | -3.716187 | -1.133963 |
| 27            | 9             | 0           | 3.091671                | 0.406802  | 1.481693  |
| 28            | 9             | 0           | 4.254028                | -0.466010 | -0.303337 |
| 29            | 15            | 0           | 2.805520                | 0.229210  | -0.106392 |

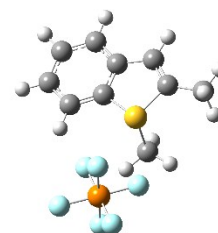

### 1,2-dmbt SbF<sub>6</sub> (in DCE)

Sum of electronic and zero-point Energies= -1390.171704 (Hartree/particle)

Sum of electronic and thermal Free Energies= -1390.222720 (Hartree/particle)

No imaginary frequencies

Standard orientation:

| Center Number | Atomic Number | Atomic Type | Coordinates (Angstroms) |           |           |
|---------------|---------------|-------------|-------------------------|-----------|-----------|
|               |               |             | X                       | Y         | Z         |
| 1             | 6             | 0           | -3.918009               | 0.094304  | -0.189305 |
| 2             | 6             | 0           | -2.601348               | 0.541813  | -0.032429 |
| 3             | 6             | 0           | -2.255641               | 1.873121  | 0.108285  |
| 4             | 6             | 0           | -3.299768               | 2.797741  | 0.103074  |
| 5             | 6             | 0           | -4.622023               | 2.382608  | -0.054300 |
| 6             | 6             | 0           | -4.942714               | 1.035968  | -0.205297 |
| 7             | 6             | 0           | -4.014702               | -1.358976 | -0.304399 |
| 8             | 6             | 0           | -2.852271               | -2.015849 | -0.232464 |
| 9             | 1             | 0           | -1.223472               | 2.183011  | 0.213919  |
| 10            | 1             | 0           | -3.074352               | 3.851617  | 0.215940  |
| 11            | 1             | 0           | -5.414667               | 3.122274  | -0.062310 |
| 12            | 1             | 0           | -5.971880               | 0.719123  | -0.330935 |
| 13            | 1             | 0           | -4.962231               | -1.871552 | -0.428378 |
| 14            | 16            | 0           | -1.487764               | -0.845658 | -0.087022 |

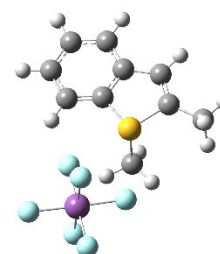

|    |    |   |           |           |           |
|----|----|---|-----------|-----------|-----------|
| 15 | 6  | 0 | -1.026371 | -1.055084 | 1.658675  |
| 16 | 1  | 0 | -1.934328 | -1.061267 | 2.258328  |
| 17 | 1  | 0 | -0.379548 | -0.218297 | 1.914514  |
| 18 | 1  | 0 | -0.479697 | -1.992983 | 1.734096  |
| 19 | 9  | 0 | 1.472808  | -1.523062 | 0.105938  |
| 20 | 9  | 0 | 0.648101  | 0.968557  | 0.026069  |
| 21 | 9  | 0 | 2.193124  | 0.044565  | -1.953818 |
| 22 | 9  | 0 | 3.185990  | 1.850173  | -0.216431 |
| 23 | 6  | 0 | -2.529834 | -3.467293 | -0.275661 |
| 24 | 1  | 0 | -2.006838 | -3.782596 | 0.631768  |
| 25 | 1  | 0 | -3.456475 | -4.036366 | -0.355125 |
| 26 | 1  | 0 | -1.895111 | -3.709001 | -1.131553 |
| 27 | 9  | 0 | 2.480340  | 0.251711  | 1.825024  |
| 28 | 9  | 0 | 4.044792  | -0.726356 | -0.148001 |
| 29 | 51 | 0 | 2.367696  | 0.148356  | -0.068118 |

1e2-mbt BF<sub>4</sub> (in DCE)

Sum of electronic and zero-point Energies= -1249.319578 (Hartree/particle)

Sum of electronic and thermal Free Energies= -1249.368545 (Hartree/particle)

No imaginary frequencies

Standard orientation:

| Center<br>Number | Atomic<br>Number | Atomic<br>Type | Coordinates (Angstroms) |           |           |
|------------------|------------------|----------------|-------------------------|-----------|-----------|
|                  |                  |                | X                       | Y         | Z         |
| 1                | 6                | 0              | -2.278170               | 0.842761  | -0.234348 |
| 2                | 6                | 0              | -0.928935               | 0.713358  | 0.112630  |
| 3                | 6                | 0              | -0.154765               | 1.764565  | 0.568690  |
| 4                | 6                | 0              | -0.781398               | 3.004587  | 0.690089  |
| 5                | 6                | 0              | -2.123544               | 3.164752  | 0.346278  |
| 6                | 6                | 0              | -2.880287               | 2.092965  | -0.118953 |
| 7                | 6                | 0              | -2.875483               | -0.416664 | -0.668912 |
| 8                | 6                | 0              | -2.054950               | -1.472614 | -0.652341 |
| 9                | 1                | 0              | 0.889473                | 1.636494  | 0.821930  |
| 10               | 1                | 0              | -0.209070               | 3.852917  | 1.046585  |
| 11               | 1                | 0              | -2.584740               | 4.141118  | 0.442664  |
| 12               | 1                | 0              | -3.923000               | 2.222359  | -0.386136 |
| 13               | 1                | 0              | -3.913494               | -0.496014 | -0.972740 |
| 14               | 16               | 0              | -0.392795               | -0.959381 | -0.178005 |
| 15               | 6                | 0              | -0.228918               | -1.652440 | 1.528571  |
| 16               | 1                | 0              | -1.235708               | -1.671257 | 1.945935  |
| 17               | 1                | 0              | 0.377724                | -0.912757 | 2.048387  |
| 18               | 9                | 0              | 2.217644                | -0.322282 | 0.650952  |
| 19               | 9                | 0              | 2.027881                | 0.548591  | -1.459199 |
| 20               | 9                | 0              | 3.985909                | -0.462515 | -0.810026 |
| 21               | 9                | 0              | 3.385575                | 1.567432  | 0.084792  |
| 22               | 5                | 0              | 2.916944                | 0.336137  | -0.394186 |
| 23               | 6                | 0              | -2.302569               | -2.903553 | -0.980363 |
| 24               | 1                | 0              | -2.258360               | -3.525385 | -0.081951 |
| 25               | 1                | 0              | -3.298800               | -3.002041 | -1.413424 |
| 26               | 1                | 0              | -1.570651               | -3.286804 | -1.694825 |
| 27               | 6                | 0              | 0.445682                | -3.007948 | 1.476157  |
| 28               | 1                | 0              | 0.535915                | -3.377714 | 2.499835  |
| 29               | 1                | 0              | -0.129536               | -3.739667 | 0.907268  |
| 30               | 1                | 0              | 1.447193                | -2.931487 | 1.051827  |

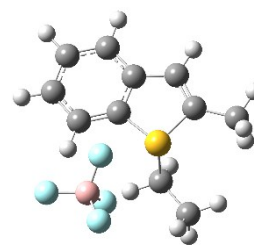

1b2-mbt BF<sub>4</sub> (in DCE)

Sum of electronic and zero-point Energies= -1327.868593 (Hartree/particle)

Sum of electronic and thermal Free Energies= -1327.922062 (Hartree/particle)  
 No imaginary frequencies

Standard orientation:

| Center Number | Atomic Number | Atomic Type | Coordinates (Angstroms) |           |           |
|---------------|---------------|-------------|-------------------------|-----------|-----------|
|               |               |             | X                       | Y         | Z         |
| 1             | 6             | 0           | 2.413540                | -1.395204 | 0.036248  |
| 2             | 6             | 0           | 1.546580                | -0.324613 | -0.208635 |
| 3             | 6             | 0           | 1.901563                | 0.793064  | -0.941391 |
| 4             | 6             | 0           | 3.195049                | 0.823168  | -1.461004 |
| 5             | 6             | 0           | 4.084046                | -0.226217 | -1.227596 |
| 6             | 6             | 0           | 3.705660                | -1.337827 | -0.479217 |
| 7             | 6             | 0           | 1.791471                | -2.459518 | 0.819082  |
| 8             | 6             | 0           | 0.514209                | -2.247688 | 1.155385  |
| 9             | 1             | 0           | 1.209893                | 1.609094  | -1.105385 |
| 10            | 1             | 0           | 3.509753                | 1.680487  | -2.044337 |
| 11            | 1             | 0           | 5.087686                | -0.174108 | -1.633883 |
| 12            | 1             | 0           | 4.401091                | -2.149800 | -0.298999 |
| 13            | 1             | 0           | 2.321708                | -3.362871 | 1.099783  |
| 14            | 16            | 0           | -0.012686               | -0.616538 | 0.597147  |
| 15            | 6             | 0           | -1.145191               | -1.009150 | -0.807592 |
| 16            | 1             | 0           | -0.799200               | -1.956385 | -1.223986 |
| 17            | 1             | 0           | -0.964752               | -0.201725 | -1.517035 |
| 18            | 9             | 0           | -1.025383               | 1.847318  | -0.284799 |
| 19            | 9             | 0           | 0.444421                | 2.388337  | 1.387426  |
| 20            | 9             | 0           | -1.625999               | 3.379218  | 1.318942  |
| 21            | 9             | 0           | -0.040090               | 3.916527  | -0.254595 |
| 22            | 5             | 0           | -0.562349               | 2.896158  | 0.551095  |
| 23            | 6             | 0           | -0.450464               | -3.096888 | 1.906392  |
| 24            | 1             | 0           | -1.263376               | -3.436290 | 1.258552  |
| 25            | 1             | 0           | 0.070986                | -3.975239 | 2.288712  |
| 26            | 1             | 0           | -0.891632               | -2.556190 | 2.746822  |
| 27            | 6             | 0           | -2.587638               | -1.033562 | -0.332351 |
| 28            | 1             | 0           | -2.727919               | -1.793362 | 0.442460  |
| 29            | 1             | 0           | -2.839332               | -0.064337 | 0.106957  |
| 30            | 6             | 0           | -3.518329               | -1.326620 | -1.509983 |
| 31            | 1             | 0           | -3.249262               | -2.289490 | -1.956643 |
| 32            | 1             | 0           | -3.368108               | -0.566548 | -2.283430 |
| 33            | 6             | 0           | -4.981134               | -1.344694 | -1.080241 |
| 34            | 1             | 0           | -5.637706               | -1.556726 | -1.927054 |
| 35            | 1             | 0           | -5.159154               | -2.110351 | -0.319986 |
| 36            | 1             | 0           | -5.278666               | -0.380449 | -0.659707 |

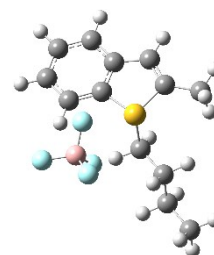

1,2,5-tmt SCN (in DCE)

Sum of electronic and zero-point Energies= -1162.292940 (Hartree/particle)  
 Sum of electronic and thermal Free Energies= -1162.335418 (Hartree/particle)  
 No imaginary frequencies

Standard orientation:

| Center Number | Atomic Number | Atomic Type | Coordinates (Angstroms) |           |           |
|---------------|---------------|-------------|-------------------------|-----------|-----------|
|               |               |             | X                       | Y         | Z         |
| 1             | 6             | 0           | -2.489217               | -0.298032 | 0.277940  |
| 2             | 6             | 0           | -2.406482               | 0.878163  | 0.913741  |
| 3             | 6             | 0           | -1.312630               | 1.744509  | 0.485639  |
| 4             | 6             | 0           | -0.533207               | 1.246208  | -0.482581 |
| 5             | 16            | 0           | -1.218063               | -0.333059 | -0.984247 |
| 6             | 1             | 0           | -3.093216               | 1.152990  | 1.705762  |
| 7             | 1             | 0           | -1.122642               | 2.711874  | 0.935635  |

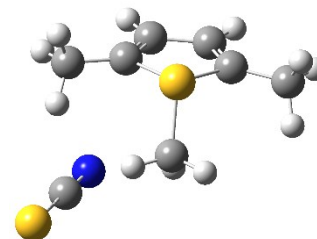

|    |    |   |           |           |           |
|----|----|---|-----------|-----------|-----------|
| 8  | 6  | 0 | -0.025752 | -1.530914 | -0.313800 |
| 9  | 1  | 0 | 0.899858  | -1.405965 | -0.876406 |
| 10 | 1  | 0 | 0.120067  | -1.323745 | 0.743784  |
| 11 | 1  | 0 | -0.443760 | -2.521013 | -0.490762 |
| 12 | 6  | 0 | -3.402339 | -1.462049 | 0.434559  |
| 13 | 1  | 0 | -3.960196 | -1.662411 | -0.482883 |
| 14 | 1  | 0 | -2.847742 | -2.365948 | 0.700996  |
| 15 | 1  | 0 | -4.111669 | -1.248438 | 1.234841  |
| 16 | 6  | 0 | 0.666801  | 1.775723  | -1.181873 |
| 17 | 1  | 0 | 1.012226  | 2.668495  | -0.659245 |
| 18 | 1  | 0 | 1.481886  | 1.046915  | -1.186571 |
| 19 | 1  | 0 | 0.436280  | 2.038021  | -2.217607 |
| 20 | 16 | 0 | 3.701141  | -0.666886 | -0.140728 |
| 21 | 6  | 0 | 2.637296  | -0.026832 | 0.959649  |
| 22 | 7  | 0 | 1.870405  | 0.421098  | 1.718917  |

## TS- alkylation

TS:  $\text{BF}_4\text{-Ag-I-CH}_3 + 2,5\text{-dmt} \rightarrow 1,2,5\text{-tmt BF}_4 \cdot \text{AgI}$

Sum of electronic and zero-point Energies= -1252.815218 (Hartree/particle)

Sum of electronic and thermal Free Energies= -1252.870430 (Hartree/particle)

1 imaginary frequency (489.8108i  $\text{cm}^{-1}$ )

Standard orientation:

| Center Number | Atomic Number | Atomic Type | Coordinates (Angstroms) |           |           |
|---------------|---------------|-------------|-------------------------|-----------|-----------|
|               |               |             | X                       | Y         | Z         |
| 1             | 6             | 0           | 1.871645                | 2.254369  | -0.852674 |
| 2             | 6             | 0           | 1.734764                | 2.784118  | 0.382525  |
| 3             | 6             | 0           | 2.700148                | 2.301302  | 1.343758  |
| 4             | 6             | 0           | 3.575549                | 1.400745  | 0.845659  |
| 5             | 16            | 0           | 3.228231                | 1.127749  | -0.859246 |
| 6             | 1             | 0           | 0.957777                | 3.500693  | 0.621930  |
| 7             | 1             | 0           | 2.725060                | 2.623382  | 2.378197  |
| 8             | 6             | 0           | 1.903426                | -0.739439 | -0.532493 |
| 9             | 1             | 0           | 2.740266                | -1.391739 | -0.328733 |
| 10            | 1             | 0           | 1.403401                | -0.232348 | 0.279823  |
| 11            | 1             | 0           | 1.505325                | -0.696684 | -1.535342 |
| 12            | 6             | 0           | 1.067325                | 2.466355  | -2.090949 |
| 13            | 1             | 0           | 0.548091                | 1.551847  | -2.392704 |
| 14            | 1             | 0           | 0.316384                | 3.235548  | -1.909521 |
| 15            | 1             | 0           | 1.694069                | 2.785053  | -2.926978 |
| 16            | 6             | 0           | 4.683263                | 0.658116  | 1.514717  |
| 17            | 1             | 0           | 4.754496                | 0.977181  | 2.555281  |
| 18            | 1             | 0           | 4.506054                | -0.421040 | 1.500621  |
| 19            | 1             | 0           | 5.644452                | 0.844558  | 1.030352  |
| 20            | 53            | 0           | 0.227566                | -2.804525 | -0.074667 |
| 21            | 47            | 0           | -1.620523               | -0.690360 | 0.142508  |
| 22            | 9             | 0           | -3.499183               | 0.816475  | 0.573094  |
| 23            | 5             | 0           | -2.929819               | 2.067622  | 0.197675  |
| 24            | 9             | 0           | -1.622498               | 1.771605  | -0.275666 |
| 25            | 9             | 0           | -3.682658               | 2.641957  | -0.816833 |
| 26            | 9             | 0           | -2.852452               | 2.900498  | 1.306388  |

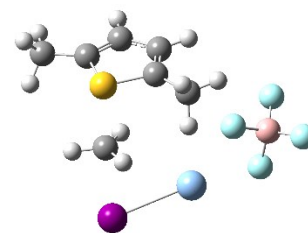

TS:  $\text{F}_3\text{B-F-CH}_3 + 2,5\text{-dmt} \rightarrow 1,2,5\text{-tmt BF}_4$

Sum of electronic and zero-point Energies= -1095.694052 (Hartree/particle)

Sum of electronic and thermal Free Energies= -1095.740238 (Hartree/particle)

1 imaginary frequency (586.4926i  $\text{cm}^{-1}$ )



Standard orientation:

| Center Number | Atomic Number | Atomic Type | Coordinates (Angstroms) |           |           |
|---------------|---------------|-------------|-------------------------|-----------|-----------|
|               |               |             | X                       | Y         | Z         |
| 1             | 6             | 0           | 2.629289                | 0.939749  | 0.203489  |
| 2             | 6             | 0           | 2.751952                | 0.222182  | 1.344519  |
| 3             | 6             | 0           | 2.252598                | -1.127052 | 1.247212  |
| 4             | 6             | 0           | 1.749682                | -1.442852 | 0.031344  |
| 5             | 16            | 0           | 1.891066                | -0.056749 | -1.042767 |
| 6             | 1             | 0           | 3.184579                | 0.637293  | 2.247370  |
| 7             | 1             | 0           | 2.264326                | -1.831130 | 2.070960  |
| 8             | 6             | 0           | -0.416924               | 0.683728  | -0.554021 |
| 9             | 1             | 0           | -0.769445               | -0.071990 | -1.241505 |
| 10            | 1             | 0           | -0.178952               | 0.429261  | 0.469016  |
| 11            | 1             | 0           | -0.182193               | 1.666462  | -0.936363 |
| 12            | 6             | 0           | 3.015597                | 2.352115  | -0.088013 |
| 13            | 1             | 0           | 2.153795                | 2.949782  | -0.397501 |
| 14            | 1             | 0           | 3.437791                | 2.804146  | 0.810425  |
| 15            | 1             | 0           | 3.762332                | 2.407768  | -0.883737 |
| 16            | 6             | 0           | 1.106498                | -2.703861 | -0.442400 |
| 17            | 1             | 0           | 1.152114                | -3.452774 | 0.349539  |
| 18            | 1             | 0           | 0.054493                | -2.543093 | -0.696431 |
| 19            | 1             | 0           | 1.606479                | -3.105626 | -1.326483 |
| 20            | 9             | 0           | -3.462613               | -0.380713 | -1.077998 |
| 21            | 9             | 0           | -2.451445               | -0.805469 | 0.932307  |
| 22            | 9             | 0           | -4.162798               | 0.725373  | 0.809509  |
| 23            | 9             | 0           | -2.116247               | 1.216752  | -0.108956 |
| 24            | 5             | 0           | -3.107323               | 0.134069  | 0.154487  |

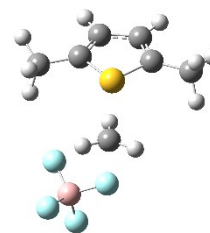

TS: F<sub>5</sub>P-F-CH<sub>3</sub>+ 2,5- dmt --> 1,2,5-tmt PF<sub>6</sub>

Sum of electronic and zero-point Energies=

-1611.808132 (Hartree/particle)

Sum of electronic and thermal Free Energies=

-1611.855124 (Hartree/particle)

1 imaginary frequency (542.0479i cm<sup>-1</sup>)

Standard orientation:

| Center Number | Atomic Number | Atomic Type | Coordinates (Angstroms) |           |           |
|---------------|---------------|-------------|-------------------------|-----------|-----------|
|               |               |             | X                       | Y         | Z         |
| 1             | 6             | 0           | 3.297031                | 0.962029  | 0.272691  |
| 2             | 6             | 0           | 3.178705                | 0.335800  | 1.468289  |
| 3             | 6             | 0           | 2.700007                | -1.019769 | 1.374791  |
| 4             | 6             | 0           | 2.455619                | -1.430224 | 0.107486  |
| 5             | 16            | 0           | 2.819490                | -0.129464 | -1.017209 |
| 6             | 1             | 0           | 3.417259                | 0.825274  | 2.405306  |
| 7             | 1             | 0           | 2.534528                | -1.659394 | 2.233787  |
| 8             | 6             | 0           | 0.374726                | 0.588810  | -0.872167 |
| 9             | 1             | 0           | 0.128546                | -0.336317 | -1.374080 |
| 10            | 1             | 0           | 0.597198                | 0.594647  | 0.184961  |
| 11            | 1             | 0           | 0.586288                | 1.463631  | -1.470435 |
| 12            | 6             | 0           | 3.733264                | 2.356214  | -0.037670 |
| 13            | 1             | 0           | 2.950658                | 2.914053  | -0.559270 |
| 14            | 1             | 0           | 3.961920                | 2.880379  | 0.891337  |
| 15            | 1             | 0           | 4.626640                | 2.368222  | -0.666383 |
| 16            | 6             | 0           | 1.919419                | -2.731740 | -0.390268 |
| 17            | 1             | 0           | 1.783653                | -3.413410 | 0.450333  |
| 18            | 1             | 0           | 0.950268                | -2.603658 | -0.882051 |
| 19            | 1             | 0           | 2.597817                | -3.199475 | -1.107440 |
| 20            | 9             | 0           | -3.645167               | 0.938589  | -0.755574 |
| 21            | 9             | 0           | -1.400867               | -0.690748 | 0.873318  |

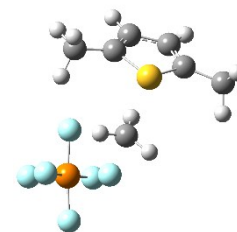

|    |    |   |           |           |           |
|----|----|---|-----------|-----------|-----------|
| 22 | 9  | 0 | -1.347701 | 1.073737  | -0.635089 |
| 23 | 9  | 0 | -2.397365 | -0.923760 | -1.153210 |
| 24 | 15 | 0 | -2.584433 | 0.082785  | 0.092429  |
| 25 | 9  | 0 | -3.717494 | -0.827296 | 0.753379  |
| 26 | 9  | 0 | -2.650600 | 1.166030  | 1.277611  |

TS: F<sub>3</sub>Sb-F-CH<sub>3</sub> + 2,5-dmt --> 1,2,5-tmt SbF<sub>6</sub>

Sum of electronic and zero-point Energies= -1275.813921 (Hartree/particle)

Sum of electronic and thermal Free Energies= -1275.863680 (Hartree/particle)

1 imaginary frequency (521.9417i cm<sup>-1</sup>)

Standard orientation:

| Center Number | Atomic Number | Atomic Type | Coordinates (Angstroms) |           |           |
|---------------|---------------|-------------|-------------------------|-----------|-----------|
|               |               |             | X                       | Y         | Z         |
| 1             | 6             | 0           | -3.960489               | -0.923748 | 0.288997  |
| 2             | 6             | 0           | -3.765296               | -0.320245 | 1.486040  |
| 3             | 6             | 0           | -3.225288               | 1.011738  | 1.389822  |
| 4             | 6             | 0           | -3.011818               | 1.428280  | 0.119078  |
| 5             | 16            | 0           | -3.479621               | 0.160581  | -1.005835 |
| 6             | 1             | 0           | -3.990371               | -0.810604 | 2.425925  |
| 7             | 1             | 0           | -2.991305               | 1.628766  | 2.249484  |
| 8             | 6             | 0           | -1.058856               | -0.637268 | -0.926383 |
| 9             | 1             | 0           | -0.805194               | 0.272007  | -1.453446 |
| 10            | 1             | 0           | -1.249611               | -0.617340 | 0.137438  |
| 11            | 1             | 0           | -1.307801               | -1.517799 | -1.500898 |
| 12            | 6             | 0           | -4.481846               | -2.288918 | -0.019228 |
| 13            | 1             | 0           | -3.759143               | -2.875447 | -0.592764 |
| 14            | 1             | 0           | -4.685714               | -2.818238 | 0.912607  |
| 15            | 1             | 0           | -5.407784               | -2.245125 | -0.597434 |
| 16            | 6             | 0           | -2.433282               | 2.710859  | -0.380072 |
| 17            | 1             | 0           | -2.164235               | 3.339567  | 0.469844  |
| 18            | 1             | 0           | -1.531099               | 2.541550  | -0.975434 |
| 19            | 1             | 0           | -3.144384               | 3.258413  | -1.003206 |
| 20            | 9             | 0           | 3.312644                | -1.303710 | -0.704586 |
| 21            | 9             | 0           | 0.722512                | 1.037383  | 0.711002  |
| 22            | 9             | 0           | 0.658231                | -1.143194 | -0.724201 |
| 23            | 9             | 0           | 2.089144                | 0.917437  | -1.557894 |
| 24            | 9             | 0           | 3.481531                | 1.009127  | 0.804670  |
| 25            | 9             | 0           | 1.966444                | -1.143549 | 1.598287  |
| 26            | 51            | 0           | 2.122692                | -0.058249 | 0.061298  |

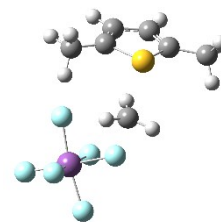

TS: F<sub>3</sub>B-F-CH<sub>3</sub> + 3-mt --> 1,3-dmt BF<sub>4</sub>

Sum of electronic and zero-point Energies= -1056.411712 (Hartree/particle)

Sum of electronic and thermal Free Energies= -1056.455653 (Hartree/particle)

1 imaginary frequency (589.4825i cm<sup>-1</sup>)

Standard orientation:

| Center Number | Atomic Number | Atomic Type | Coordinates (Angstroms) |           |           |
|---------------|---------------|-------------|-------------------------|-----------|-----------|
|               |               |             | X                       | Y         | Z         |
| 1             | 6             | 0           | 2.072252                | 0.225967  | -1.052344 |
| 2             | 6             | 0           | 2.627386                | 0.943673  | -0.046266 |
| 3             | 6             | 0           | 2.867275                | 0.128877  | 1.127497  |
| 4             | 6             | 0           | 2.493122                | -1.160221 | 0.977884  |
| 5             | 16            | 0           | 1.839667                | -1.443098 | -0.612084 |
| 6             | 1             | 0           | 3.300323                | 0.521472  | 2.040030  |
| 7             | 6             | 0           | -0.503251               | -1.118898 | 0.094575  |

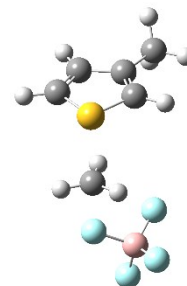

|    |   |   |           |           |           |
|----|---|---|-----------|-----------|-----------|
| 8  | 1 | 0 | -0.478736 | -2.066582 | 0.611460  |
| 9  | 1 | 0 | -0.136919 | -0.226474 | 0.581664  |
| 10 | 1 | 0 | -0.793161 | -1.093724 | -0.946177 |
| 11 | 9 | 0 | -4.072648 | 0.552094  | 0.803668  |
| 12 | 9 | 0 | -2.085268 | 1.379108  | -0.004174 |
| 13 | 9 | 0 | -3.284695 | -0.126654 | -1.245059 |
| 14 | 9 | 0 | -2.229253 | -0.809946 | 0.682439  |
| 15 | 5 | 0 | -2.962391 | 0.307435  | 0.027838  |
| 16 | 1 | 0 | 2.554545  | -1.975294 | 1.685174  |
| 17 | 1 | 0 | 1.778024  | 0.561217  | -2.037299 |
| 18 | 6 | 0 | 2.955153  | 2.403444  | -0.110553 |
| 19 | 1 | 0 | 2.671187  | 2.829261  | -1.073063 |
| 20 | 1 | 0 | 2.431218  | 2.949551  | 0.677797  |
| 21 | 1 | 0 | 4.025934  | 2.564499  | 0.037961  |

TS: F<sub>5</sub>P-F-CH<sub>3</sub> + 3-mt --> 1,3-dmt PF<sub>6</sub>

Sum of electronic and zero-point Energies= -1572.526643 (Hartree/particle)

Sum of electronic and thermal Free Energies= -1572.572467 (Hartree/particle)

1 imaginary frequency (544.9505i cm<sup>-1</sup>)

Standard orientation:

| Center Number | Atomic Number | Atomic Type | Coordinates (Angstroms) |           |           |
|---------------|---------------|-------------|-------------------------|-----------|-----------|
|               |               |             | X                       | Y         | Z         |
| 1             | 6             | 0           | 3.409886                | -0.155752 | -0.923311 |
| 2             | 6             | 0           | 3.491969                | 0.897307  | -0.071975 |
| 3             | 6             | 0           | 3.042738                | 0.547586  | 1.257904  |
| 4             | 6             | 0           | 2.644788                | -0.739055 | 1.373121  |
| 5             | 16            | 0           | 2.803278                | -1.585326 | -0.139320 |
| 6             | 1             | 0           | 3.022390                | 1.252180  | 2.080914  |
| 7             | 6             | 0           | 0.367476                | -1.032793 | -0.690782 |
| 8             | 1             | 0           | 0.072745                | -1.709025 | 0.098421  |
| 9             | 1             | 0           | 0.693523                | -0.029954 | -0.455266 |
| 10            | 1             | 0           | 0.501422                | -1.421651 | -1.690178 |
| 11            | 9             | 0           | -3.601395               | -0.105935 | -1.083880 |
| 12            | 9             | 0           | -1.264877               | 0.385197  | 1.073955  |
| 13            | 9             | 0           | -1.335785               | -0.512086 | -1.065810 |
| 14            | 9             | 0           | -2.702237               | -1.317942 | 0.621005  |
| 15            | 15            | 0           | -2.489510               | 0.170121  | 0.041208  |
| 16            | 9             | 0           | -3.551435               | 0.793549  | 1.058941  |
| 17            | 9             | 0           | -2.170576               | 1.601984  | -0.619540 |
| 18            | 1             | 0           | 3.672683                | -0.193442 | -1.971565 |
| 19            | 1             | 0           | 2.261102                | -1.258148 | 2.240217  |
| 20            | 6             | 0           | 3.976482                | 2.266116  | -0.439918 |
| 21            | 1             | 0           | 4.257171                | 2.315514  | -1.492390 |
| 22            | 1             | 0           | 3.200147                | 3.012434  | -0.253664 |
| 23            | 1             | 0           | 4.845748                | 2.542135  | 0.162229  |

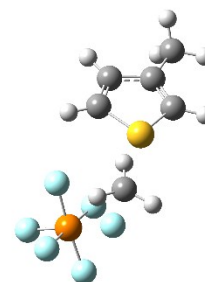

TS: F<sub>5</sub>Sb-F-CH<sub>3</sub> + 3-mt --> 1,3-dmt SbF<sub>6</sub>

Sum of electronic and zero-point Energies= -1236.532057 (Hartree/particle)

Sum of electronic and thermal Free Energies= -1236.580147 (Hartree/particle)

1 imaginary frequency (532.0790i cm<sup>-1</sup>)

Standard orientation:

| Center Number | Atomic Number | Atomic Type | Coordinates (Angstroms) |           |           |
|---------------|---------------|-------------|-------------------------|-----------|-----------|
|               |               |             | X                       | Y         | Z         |
| 1             | 6             | 0           | 4.086389                | -0.147827 | -0.884077 |

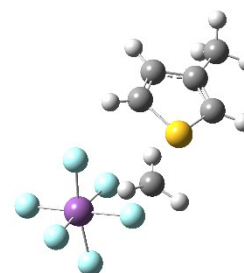

|    |    |   |           |           |           |
|----|----|---|-----------|-----------|-----------|
| 2  | 6  | 0 | 4.021212  | 0.909442  | -0.039587 |
| 3  | 6  | 0 | 3.468128  | 0.594268  | 1.252624  |
| 4  | 6  | 0 | 3.114598  | -0.704907 | 1.397626  |
| 5  | 16 | 0 | 3.461537  | -1.581910 | -0.086230 |
| 6  | 1  | 0 | 3.327288  | 1.325087  | 2.040380  |
| 7  | 6  | 0 | 1.067623  | -1.074818 | -0.803873 |
| 8  | 1  | 0 | 0.753673  | -1.750703 | -0.020588 |
| 9  | 1  | 0 | 1.373959  | -0.066034 | -0.565099 |
| 10 | 1  | 0 | 1.255792  | -1.474781 | -1.789773 |
| 11 | 9  | 0 | -3.250148 | -0.245861 | -1.326395 |
| 12 | 9  | 0 | -0.530414 | 0.356734  | 1.210003  |
| 13 | 9  | 0 | -0.614665 | -0.586063 | -1.223697 |
| 14 | 9  | 0 | -2.137404 | -1.674579 | 0.643160  |
| 15 | 9  | 0 | -3.262312 | 0.752394  | 1.254095  |
| 16 | 9  | 0 | -1.659909 | 1.812218  | -0.712732 |
| 17 | 51 | 0 | -1.988704 | 0.107502  | 0.029198  |
| 18 | 1  | 0 | 2.688775  | -1.132754 | 2.281098  |
| 19 | 1  | 0 | 4.461742  | -0.114165 | -1.885514 |
| 20 | 6  | 0 | 4.488797  | 2.319044  | -0.447001 |
| 21 | 1  | 0 | 5.441901  | 2.253282  | -0.928839 |
| 22 | 1  | 0 | 3.777667  | 2.749956  | -1.120432 |
| 23 | 1  | 0 | 4.571702  | 2.933292  | 0.425195  |

TS: F<sub>3</sub>B-F-CH<sub>3</sub> + 2-et --> 1m2-et BF<sub>4</sub>

Sum of electronic and zero-point Energies= -1095.686836 (Hartree/particle)

Sum of electronic and thermal Free Energies= -1095.730845 (Hartree/particle)

1 imaginary frequency (587.8660i cm<sup>-1</sup>)

Standard orientation:

| Center<br>Number | Atomic<br>Number | Atomic<br>Type | Coordinates (Angstroms) |           |           |
|------------------|------------------|----------------|-------------------------|-----------|-----------|
|                  |                  |                | X                       | Y         | Z         |
| 1                | 6                | 0              | 2.000374                | 0.490256  | -0.089273 |
| 2                | 6                | 0              | 2.213796                | 0.221510  | 1.221749  |
| 3                | 6                | 0              | 2.347489                | -1.184026 | 1.515576  |
| 4                | 6                | 0              | 2.228533                | -1.970034 | 0.422883  |
| 5                | 16               | 0              | 1.961212                | -1.010980 | -1.006249 |
| 6                | 1                | 0              | 2.269138                | 0.994368  | 1.978459  |
| 7                | 1                | 0              | 2.519559                | -1.574573 | 2.510710  |
| 8                | 6                | 0              | -0.496848               | -1.046894 | -0.860342 |
| 9                | 1                | 0              | -0.525868               | -2.067319 | -1.213261 |
| 10               | 1                | 0              | -0.332885               | -0.847925 | 0.189928  |
| 11               | 1                | 0              | -0.517197               | -0.240621 | -1.578130 |
| 12               | 6                | 0              | 1.771923                | 1.797857  | -0.786775 |
| 13               | 1                | 0              | 0.813747                | 1.758733  | -1.317896 |
| 14               | 1                | 0              | 2.540264                | 1.936104  | -1.554094 |
| 15               | 9                | 0              | -4.192143               | 0.259719  | -0.194229 |
| 16               | 9                | 0              | -2.749832               | -0.329435 | 1.493907  |
| 17               | 9                | 0              | -2.100494               | 1.207115  | -0.075481 |
| 18               | 9                | 0              | -2.333689               | -1.002400 | -0.669257 |
| 19               | 5                | 0              | -2.879397               | 0.089640  | 0.183741  |
| 20               | 1                | 0              | 2.284495                | -3.046469 | 0.344945  |
| 21               | 6                | 0              | 1.773721                | 2.980957  | 0.173847  |
| 22               | 1                | 0              | 2.731787                | 3.072526  | 0.690553  |
| 23               | 1                | 0              | 1.599257                | 3.907576  | -0.375443 |
| 24               | 1                | 0              | 0.986789                | 2.882338  | 0.925042  |

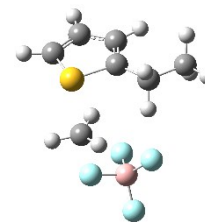

TS: F<sub>5</sub>P-F-CH<sub>3</sub> + 2-et --> 1m2-et PF<sub>6</sub>

Sum of electronic and zero-point Energies= -1611.801496 (Hartree/particle)

Sum of electronic and thermal Free Energies= -1611.847978 (Hartree/particle)

1 imaginary frequency (542.8179i cm<sup>-1</sup>)

Standard orientation:

| Center Number | Atomic Number | Atomic Type | Coordinates (Angstroms) |           |           |
|---------------|---------------|-------------|-------------------------|-----------|-----------|
|               |               |             | X                       | Y         | Z         |
| 1             | 6             | 0           | 3.273780                | 0.105303  | 0.417416  |
| 2             | 6             | 0           | 3.069512                | -0.838733 | 1.369619  |
| 3             | 6             | 0           | 2.501708                | -2.063446 | 0.868259  |
| 4             | 6             | 0           | 2.280711                | -2.034319 | -0.465311 |
| 5             | 16            | 0           | 2.758454                | -0.504432 | -1.148215 |
| 6             | 1             | 0           | 3.318142                | -0.673614 | 2.411265  |
| 7             | 1             | 0           | 2.267088                | -2.918602 | 1.489515  |
| 8             | 6             | 0           | 0.346402                | 0.316868  | -0.932227 |
| 9             | 1             | 0           | 0.063355                | -0.463025 | -1.623113 |
| 10            | 1             | 0           | 0.494031                | 0.086480  | 0.114765  |
| 11            | 1             | 0           | 0.647874                | 1.277843  | -1.321284 |
| 12            | 6             | 0           | 3.851440                | 1.480935  | 0.555754  |
| 13            | 1             | 0           | 4.086034                | 1.626700  | 1.612945  |
| 14            | 1             | 0           | 4.798782                | 1.535769  | 0.010309  |
| 15            | 9             | 0           | -1.912169               | -1.325261 | -0.360887 |
| 16            | 9             | 0           | -3.247794               | 1.471087  | 0.508068  |
| 17            | 9             | 0           | -1.362273               | 0.901388  | -0.689855 |
| 18            | 9             | 0           | -1.723586               | 0.055453  | 1.433849  |
| 19            | 15            | 0           | -2.640951               | 0.038405  | 0.107732  |
| 20            | 9             | 0           | -3.815226               | -0.756075 | 0.843373  |
| 21            | 9             | 0           | -3.441530               | 0.084104  | -1.285696 |
| 22            | 1             | 0           | 1.859208                | -2.796792 | -1.105131 |
| 23            | 6             | 0           | 2.914370                | 2.586680  | 0.068658  |
| 24            | 1             | 0           | 3.361879                | 3.566780  | 0.244694  |
| 25            | 1             | 0           | 2.721475                | 2.506797  | -1.005104 |
| 26            | 1             | 0           | 1.956787                | 2.550514  | 0.593935  |

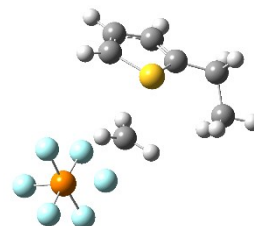

TS: F<sub>5</sub>Sb-F-CH<sub>3</sub> + 2-et --> 1m2-et SbF<sub>6</sub>

Sum of electronic and zero-point Energies= -1275.807628 (Hartree/particle)

Sum of electronic and thermal Free Energies= -1275.857984 (Hartree/particle)

1 imaginary frequency (-527.4567 cm<sup>-1</sup>)

Standard orientation:

| Center Number | Atomic Number | Atomic Type | Coordinates (Angstroms) |           |           |
|---------------|---------------|-------------|-------------------------|-----------|-----------|
|               |               |             | X                       | Y         | Z         |
| 1             | 6             | 0           | 3.889739                | 0.095352  | 0.442832  |
| 2             | 6             | 0           | 3.611154                | -0.822918 | 1.401225  |
| 3             | 6             | 0           | 3.033160                | -2.041619 | 0.895677  |
| 4             | 6             | 0           | 2.881613                | -2.035623 | -0.447408 |
| 5             | 16            | 0           | 3.437342                | -0.533134 | -1.135556 |
| 6             | 1             | 0           | 3.810230                | -0.642492 | 2.450952  |
| 7             | 1             | 0           | 2.743181                | -2.876380 | 1.521180  |
| 8             | 6             | 0           | 1.049289                | 0.339842  | -1.027535 |
| 9             | 1             | 0           | 0.767671                | -0.488683 | -1.660226 |
| 10            | 1             | 0           | 1.186394                | 0.187478  | 0.034698  |
| 11            | 1             | 0           | 1.362058                | 1.266946  | -1.484596 |
| 12            | 6             | 0           | 4.483785                | 1.463449  | 0.585207  |
| 13            | 1             | 0           | 4.697674                | 1.612643  | 1.646310  |
| 14            | 1             | 0           | 5.442539                | 1.504973  | 0.059089  |
| 15            | 9             | 0           | -3.108584               | 1.646783  | -0.110983 |

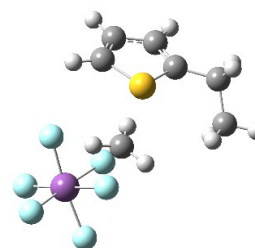

|    |    |   |           |           |           |
|----|----|---|-----------|-----------|-----------|
| 16 | 9  | 0 | -0.996407 | -1.465255 | 0.132284  |
| 17 | 9  | 0 | -0.654588 | 0.932128  | -0.834381 |
| 18 | 9  | 0 | -2.739584 | -0.508021 | -1.644681 |
| 19 | 9  | 0 | -3.571135 | -0.870652 | 0.941640  |
| 20 | 9  | 0 | -1.408796 | 0.643304  | 1.692309  |
| 21 | 51 | 0 | -2.162506 | 0.025620  | 0.073252  |
| 22 | 1  | 0 | 2.470551  | -2.799286 | -1.092593 |
| 23 | 6  | 0 | 3.568463  | 2.577022  | 0.073581  |
| 24 | 1  | 0 | 4.022337  | 3.553147  | 0.255465  |
| 25 | 1  | 0 | 3.396509  | 2.494736  | -1.003403 |
| 26 | 1  | 0 | 2.599807  | 2.552810  | 0.579015  |

TS: F<sub>3</sub>B-F-CH<sub>3</sub> + bt --> 1-mbt BF<sub>4</sub>

Sum of electronic and zero-point Energies= -1170.713807 (Hartree/particle)

Sum of electronic and thermal Free Energies= -1170.759517 (Hartree/particle)

1 imaginary frequency (593.6362i cm<sup>-1</sup>)

Standard orientation:

| Center Number | Atomic Number | Atomic Type | Coordinates (Angstroms) |           |           |
|---------------|---------------|-------------|-------------------------|-----------|-----------|
|               |               |             | X                       | Y         | Z         |
| 1             | 6             | 0           | -1.787294               | -0.028510 | 0.585814  |
| 2             | 6             | 0           | -2.401413               | 0.015058  | -0.676337 |
| 3             | 6             | 0           | -2.458151               | -1.291957 | -1.302545 |
| 4             | 6             | 0           | -1.910697               | -2.264273 | -0.551828 |
| 5             | 16            | 0           | -1.293370               | -1.670172 | 0.982557  |
| 6             | 1             | 0           | -2.896567               | -1.465399 | -2.277810 |
| 7             | 6             | 0           | 1.039098                | -1.305560 | 0.250900  |
| 8             | 1             | 0           | 1.211121                | -2.370893 | 0.282999  |
| 9             | 1             | 0           | 0.601079                | -0.856472 | -0.629372 |
| 10            | 1             | 0           | 1.178172                | -0.721410 | 1.149731  |
| 11            | 6             | 0           | -1.601412               | 1.109553  | 1.365009  |
| 12            | 1             | 0           | -1.122865               | 1.055976  | 2.336386  |
| 13            | 9             | 0           | 3.318688                | 0.648010  | 1.163296  |
| 14            | 9             | 0           | 4.484322                | 0.416450  | -0.803298 |
| 15            | 9             | 0           | 2.325068                | 1.208152  | -0.822049 |
| 16            | 9             | 0           | 2.741168                | -1.000797 | -0.333974 |
| 17            | 5             | 0           | 3.251350                | 0.395679  | -0.194807 |
| 18            | 1             | 0           | -1.821799               | -3.318500 | -0.774275 |
| 19            | 6             | 0           | -2.054291               | 2.319432  | 0.856540  |
| 20            | 1             | 0           | -1.922819               | 3.224148  | 1.438936  |
| 21            | 6             | 0           | -2.855601               | 1.245879  | -1.165132 |
| 22            | 1             | 0           | -3.335883               | 1.299371  | -2.136164 |
| 23            | 6             | 0           | -2.678633               | 2.385180  | -0.396551 |
| 24            | 1             | 0           | -3.026114               | 3.342386  | -0.768322 |

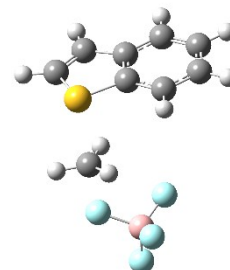

TS: F<sub>5</sub>P-F-CH<sub>3</sub> + bt --> 1-mbt PF<sub>6</sub>

Sum of electronic and zero-point Energies= -1686.827767 (Hartree/particle)

Sum of electronic and thermal Free Energies= -1686.874826 (Hartree/particle)

1 imaginary frequency (547.9754i cm<sup>-1</sup>)

Standard orientation:

| Center Number | Atomic Number | Atomic Type | Coordinates (Angstroms) |           |           |
|---------------|---------------|-------------|-------------------------|-----------|-----------|
|               |               |             | X                       | Y         | Z         |
| 1             | 6             | 0           | 2.863907                | -0.266213 | -0.441560 |
| 2             | 6             | 0           | 2.882607                | 0.065967  | 0.923641  |

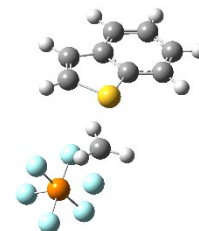

|    |    |   |           |           |           |
|----|----|---|-----------|-----------|-----------|
| 3  | 6  | 0 | 2.329380  | -0.988304 | 1.750050  |
| 4  | 6  | 0 | 1.912639  | -2.053068 | 1.040860  |
| 5  | 16 | 0 | 2.161593  | -1.859751 | -0.687069 |
| 6  | 1  | 0 | 2.255271  | -0.923689 | 2.828689  |
| 7  | 6  | 0 | -0.187471 | -0.892843 | -1.028128 |
| 8  | 1  | 0 | -0.581227 | -1.873559 | -0.806011 |
| 9  | 1  | 0 | 0.121359  | -0.237110 | -0.225930 |
| 10 | 1  | 0 | 0.082645  | -0.651283 | -2.046127 |
| 11 | 9  | 0 | -1.805228 | 1.327657  | 0.588342  |
| 12 | 9  | 0 | -3.919886 | -0.816944 | -0.536361 |
| 13 | 9  | 0 | -1.811286 | -0.133500 | -1.209958 |
| 14 | 9  | 0 | -3.515310 | 1.388615  | -0.912256 |
| 15 | 9  | 0 | -3.922361 | 0.654860  | 1.256639  |
| 16 | 9  | 0 | -2.202087 | -0.878734 | 0.951763  |
| 17 | 1  | 0 | 1.463090  | -2.967640 | 1.402174  |
| 18 | 6  | 0 | 3.328344  | 0.602790  | -1.426199 |
| 19 | 6  | 0 | 3.856731  | 2.183646  | 0.338226  |
| 20 | 6  | 0 | 3.824840  | 1.833114  | -1.019156 |
| 21 | 6  | 0 | 3.392084  | 1.312275  | 1.309751  |
| 22 | 1  | 0 | 3.415099  | 1.585112  | 2.359348  |
| 23 | 1  | 0 | 4.249031  | 3.151278  | 0.629804  |
| 24 | 1  | 0 | 4.194803  | 2.530612  | -1.762073 |
| 25 | 1  | 0 | 3.307552  | 0.329078  | -2.475346 |
| 26 | 15 | 0 | -2.915072 | 0.276762  | 0.077343  |

TS: F<sub>5</sub>Sb-F-CH<sub>3</sub> + bt --> 1-mbt SbF<sub>6</sub>

Sum of electronic and zero-point Energies= -1350.833753 (Hartree/particle)

Sum of electronic and thermal Free Energies= -1350.884054 (Hartree/particle)

1 imaginary frequency (529.9266i cm<sup>-1</sup>)

Standard orientation:

| Center<br>Number | Atomic<br>Number | Atomic<br>Type | Coordinates (Angstroms) |           |           |
|------------------|------------------|----------------|-------------------------|-----------|-----------|
|                  |                  |                | X                       | Y         | Z         |
| 1                | 6                | 0              | 3.626172                | -0.300633 | -0.417103 |
| 2                | 6                | 0              | 3.611502                | 0.080542  | 0.935517  |
| 3                | 6                | 0              | 2.949165                | -0.900873 | 1.771664  |
| 4                | 6                | 0              | 2.491471                | -1.961504 | 1.081550  |
| 5                | 16               | 0              | 2.828782                | -1.851694 | -0.638481 |
| 6                | 1                | 0              | 2.829838                | -0.789806 | 2.842507  |
| 7                | 6                | 0              | 0.559344                | -0.752662 | -1.076012 |
| 8                | 1                | 0              | 0.111884                | -1.716772 | -0.880257 |
| 9                | 1                | 0              | 0.873412                | -0.124192 | -0.255160 |
| 10               | 1                | 0              | 0.873352                | -0.517770 | -2.082810 |
| 11               | 9                | 0              | -1.926169               | 1.937402  | 0.415662  |
| 12               | 9                | 0              | -2.876943               | -1.597747 | -0.481035 |
| 13               | 9                | 0              | -1.012079               | 0.090611  | -1.269431 |
| 14               | 9                | 0              | -3.574360               | 0.825558  | -1.359092 |
| 15               | 9                | 0              | -3.873166               | 0.215455  | 1.330401  |
| 16               | 9                | 0              | -1.211636               | -0.485526 | 1.267100  |
| 17               | 51               | 0              | -2.498845               | 0.177114  | 0.046642  |
| 18               | 1                | 0              | 1.960914                | -2.827753 | 1.452148  |
| 19               | 6                | 0              | 4.194800                | 0.494318  | -1.409293 |
| 20               | 6                | 0              | 4.767005                | 2.096557  | 0.321572  |
| 21               | 6                | 0              | 4.764811                | 1.699085  | -1.023263 |
| 22               | 6                | 0              | 4.197047                | 1.299495  | 1.300739  |
| 23               | 1                | 0              | 4.198147                | 1.608942  | 2.340353  |
| 24               | 1                | 0              | 5.221834                | 3.041463  | 0.596410  |
| 25               | 1                | 0              | 5.215613                | 2.339427  | -1.772904 |
| 26               | 1                | 0              | 4.196859                | 0.183048  | -2.448007 |

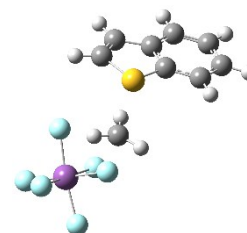

TS: F<sub>3</sub>B-F-CH<sub>3</sub> + 2-mbt --> 1,2-dmbt BF<sub>4</sub>

Sum of electronic and zero-point Energies= -1209.995418 (Hartree/particle)

Sum of electronic and thermal Free Energies= -1210.042626 (Hartree/particle)

1 imaginary frequency (-583.3440 cm<sup>-1</sup>)

Standard orientation:

| Center Number | Atomic Number | Atomic Type | Coordinates (Angstroms) |           |           |
|---------------|---------------|-------------|-------------------------|-----------|-----------|
|               |               |             | X                       | Y         | Z         |
| 1             | 6             | 0           | -2.090710               | -0.052028 | -0.577936 |
| 2             | 6             | 0           | -2.241841               | 0.141560  | 0.805108  |
| 3             | 6             | 0           | -1.520957               | 1.307051  | 1.277611  |
| 4             | 6             | 0           | -0.854519               | 1.972567  | 0.315111  |
| 5             | 16            | 0           | -1.070990               | 1.203836  | -1.268903 |
| 6             | 1             | 0           | -1.507458               | 1.616372  | 2.316573  |
| 7             | 6             | 0           | 1.048856                | -0.070793 | -1.098291 |
| 8             | 1             | 0           | 1.574717                | 0.818968  | -1.410495 |
| 9             | 1             | 0           | 0.765472                | -0.204690 | -0.062779 |
| 10            | 1             | 0           | 0.674012                | -0.753344 | -1.846962 |
| 11            | 6             | 0           | -2.681426               | -1.115896 | -1.252263 |
| 12            | 1             | 0           | -2.553863               | -1.245601 | -2.321292 |
| 13            | 9             | 0           | 2.769019                | -1.139775 | 1.382826  |
| 14            | 9             | 0           | 4.642560                | -1.310418 | 0.063401  |
| 15            | 9             | 0           | 3.545294                | 0.700958  | 0.263704  |
| 16            | 9             | 0           | 2.583120                | -1.027226 | -0.910439 |
| 17            | 5             | 0           | 3.438295                | -0.678770 | 0.266018  |
| 18            | 6             | 0           | -3.444586               | -2.008307 | -0.509849 |
| 19            | 1             | 0           | -3.917197               | -2.847566 | -1.007168 |
| 20            | 6             | 0           | -3.019014               | -0.767844 | 1.530963  |
| 21            | 1             | 0           | -3.149934               | -0.635729 | 2.599667  |
| 22            | 6             | 0           | -3.611638               | -1.833420 | 0.869796  |
| 23            | 1             | 0           | -4.212781               | -2.542385 | 1.427806  |
| 24            | 6             | 0           | 0.024256                | 3.172288  | 0.424173  |
| 25            | 1             | 0           | 0.012986                | 3.539174  | 1.451026  |
| 26            | 1             | 0           | 1.057649                | 2.928245  | 0.159870  |
| 27            | 1             | 0           | -0.309701               | 3.976084  | -0.235861 |

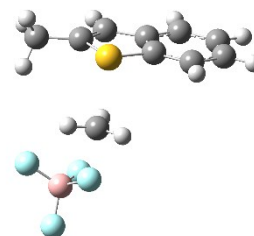

TS: F<sub>3</sub>P-F-CH<sub>3</sub> + 2-mbt --> 1,2-dmbt PF<sub>6</sub>

Sum of electronic and zero-point Energies= -1726.109401 (Hartree/particle)

Sum of electronic and thermal Free Energies= -1726.157813 (Hartree/particle)

1 imaginary frequency (544.5235i cm<sup>-1</sup>)

Standard orientation:

| Center Number | Atomic Number | Atomic Type | Coordinates (Angstroms) |           |           |
|---------------|---------------|-------------|-------------------------|-----------|-----------|
|               |               |             | X                       | Y         | Z         |
| 1             | 6             | 0           | -2.911604               | -0.047217 | -0.547409 |
| 2             | 6             | 0           | -2.923154               | 0.009118  | 0.856519  |
| 3             | 6             | 0           | -2.204712               | 1.159673  | 1.364729  |
| 4             | 6             | 0           | -1.673785               | 1.945596  | 0.407159  |
| 5             | 16            | 0           | -2.020381               | 1.313427  | -1.213583 |
| 6             | 1             | 0           | -2.093608               | 1.372221  | 2.421898  |
| 7             | 6             | 0           | 0.231641                | 0.087338  | -1.170962 |
| 8             | 1             | 0           | 0.685772                | 1.065703  | -1.235442 |
| 9             | 1             | 0           | -0.152147               | -0.274450 | -0.228126 |

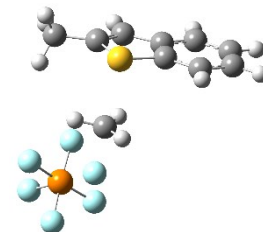



|    |    |   |           |           |           |
|----|----|---|-----------|-----------|-----------|
| 10 | 1  | 0 | -0.029931 | -0.427813 | -2.084778 |
| 11 | 9  | 0 | 3.006836  | 1.116814  | -0.496912 |
| 12 | 9  | 0 | 2.967980  | -1.889850 | 0.638480  |
| 13 | 9  | 0 | 1.786556  | -0.783394 | -1.017532 |
| 14 | 9  | 0 | 1.879006  | 0.039787  | 1.151134  |
| 15 | 9  | 0 | 4.203100  | 0.007702  | 1.155597  |
| 16 | 9  | 0 | 4.095576  | -0.812550 | -1.016066 |
| 17 | 6  | 0 | -3.527987 | -1.073557 | -1.257913 |
| 18 | 6  | 0 | -4.200563 | -2.028266 | 0.868549  |
| 19 | 6  | 0 | -4.173299 | -2.065955 | -0.532043 |
| 20 | 6  | 0 | -3.582951 | -1.001864 | 1.566301  |
| 21 | 1  | 0 | -3.604239 | -0.975454 | 2.650432  |
| 22 | 1  | 0 | -4.712374 | -2.814711 | 1.411787  |
| 23 | 1  | 0 | -4.663466 | -2.877768 | -1.057330 |
| 24 | 1  | 0 | -3.508834 | -1.097097 | -2.341680 |
| 25 | 6  | 0 | -0.850425 | 3.181701  | 0.543865  |
| 26 | 1  | 0 | -0.736176 | 3.428355  | 1.599968  |
| 27 | 1  | 0 | 0.147235  | 3.044350  | 0.115587  |
| 28 | 1  | 0 | -1.316754 | 4.029928  | 0.037159  |
| 29 | 15 | 0 | 3.050678  | -0.372938 | 0.120184  |

TS: F<sub>5</sub>Sb-F-CH<sub>3</sub> + 2-mbt --> 1,2-dmbt SbF<sub>6</sub>

Sum of electronic and zero-point Energies= -1390.115893 (Hartree/particle)

Sum of electronic and thermal Free Energies= -1390.167771 (Hartree/particle)

1 imaginary frequency (530.9158i cm<sup>-1</sup>)

Standard orientation:

| Center Number | Atomic Number | Atomic Type | Coordinates (Angstroms) |           |           |
|---------------|---------------|-------------|-------------------------|-----------|-----------|
|               |               |             | X                       | Y         | Z         |
| 1             | 6             | 0           | -3.562421               | -0.057140 | -0.519261 |
| 2             | 6             | 0           | -3.473997               | -0.116290 | 0.882037  |
| 3             | 6             | 0           | -2.785308               | 1.031498  | 1.436254  |
| 4             | 6             | 0           | -2.373687               | 1.925261  | 0.515208  |
| 5             | 16            | 0           | -2.800757               | 1.405820  | -1.126112 |
| 6             | 1             | 0           | -2.605742               | 1.163235  | 2.497150  |
| 7             | 6             | 0           | -0.482589               | 0.342976  | -1.319681 |
| 8             | 1             | 0           | -0.101807               | 1.351997  | -1.383245 |
| 9             | 1             | 0           | -0.763783               | -0.072778 | -0.362354 |
| 10            | 1             | 0           | -0.783840               | -0.160062 | -2.227400 |
| 11            | 9             | 0           | 3.124600                | 1.286010  | -0.880070 |
| 12            | 9             | 0           | 1.782575                | -1.770425 | 0.869757  |
| 13            | 9             | 0           | 1.133546                | -0.408781 | -1.318037 |
| 14            | 9             | 0           | 1.279886                | 0.836110  | 0.975004  |
| 15            | 9             | 0           | 3.862147                | -0.053567 | 1.401020  |
| 16            | 9             | 0           | 3.603938                | -1.337978 | -1.038295 |
| 17            | 6             | 0           | -4.175474               | -1.055170 | -1.271386 |
| 18            | 6             | 0           | -4.639402               | -2.218335 | 0.805995  |
| 19            | 6             | 0           | -4.713292               | -2.139523 | -0.591239 |
| 20            | 6             | 0           | -4.026970               | -1.218387 | 1.545495  |
| 21            | 1             | 0           | -3.971902               | -1.281989 | 2.627002  |
| 22            | 1             | 0           | -5.070318               | -3.073902 | 1.313610  |
| 23            | 1             | 0           | -5.198845               | -2.932166 | -1.149047 |
| 24            | 1             | 0           | -4.235757               | -0.987734 | -2.352019 |
| 25            | 6             | 0           | -1.624511               | 3.201814  | 0.699982  |
| 26            | 1             | 0           | -0.696544               | 3.210732  | 0.121206  |
| 27            | 1             | 0           | -2.220980               | 4.060873  | 0.382477  |
| 28            | 1             | 0           | -1.371451               | 3.327154  | 1.753345  |
| 29            | 51            | 0           | 2.547035                | -0.240020 | 0.070828  |

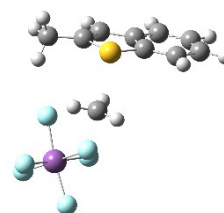

TS: F<sub>5</sub>Sb-F-CH<sub>2</sub>-CH<sub>3</sub> + 2-mbt --> 1e2-mbt BF<sub>4</sub>

Sum of electronic and zero-point Energies= -1249.280310 (Hartree/particle)

Sum of electronic and thermal Free Energies= -1249.329129 (Hartree/particle)

1 imaginary frequency (403.7019i cm<sup>-1</sup>)

Standard orientation:

| Center Number | Atomic Number | Atomic Type | Coordinates (Angstroms) |           |           |
|---------------|---------------|-------------|-------------------------|-----------|-----------|
|               |               |             | X                       | Y         | Z         |
| 1             | 6             | 0           | -2.246727               | 0.037412  | -0.469252 |
| 2             | 6             | 0           | -2.199085               | 0.562562  | 0.834840  |
| 3             | 6             | 0           | -1.232107               | 1.633361  | 0.955630  |
| 4             | 6             | 0           | -0.577123               | 1.913788  | -0.190023 |
| 5             | 16            | 0           | -1.104558               | 0.861682  | -1.512617 |
| 6             | 1             | 0           | -1.039982               | 2.161909  | 1.882362  |
| 7             | 6             | 0           | 0.891263                | -0.810666 | -0.811265 |
| 8             | 1             | 0           | 1.491053                | -0.081924 | -1.339255 |
| 9             | 1             | 0           | 0.522333                | -0.542662 | 0.170808  |
| 10            | 6             | 0           | -3.096702               | -1.008644 | -0.820474 |
| 11            | 1             | 0           | -3.123134               | -1.394094 | -1.833761 |
| 12            | 9             | 0           | 3.959594                | 0.239844  | -0.605040 |
| 13            | 9             | 0           | 2.634610                | 0.509237  | 1.243029  |
| 14            | 9             | 0           | 4.396987                | -0.967229 | 1.302229  |
| 15            | 9             | 0           | 2.539459                | -1.445062 | 0.040439  |
| 16            | 5             | 0           | 3.425629                | -0.376251 | 0.519395  |
| 17            | 6             | 0           | -3.917204               | -1.537402 | 0.167344  |
| 18            | 1             | 0           | -4.588641               | -2.352451 | -0.077681 |
| 19            | 6             | 0           | -3.040034               | 0.015447  | 1.811987  |
| 20            | 1             | 0           | -3.020920               | 0.407402  | 2.823186  |
| 21            | 6             | 0           | -3.888858               | -1.026966 | 1.472171  |
| 22            | 1             | 0           | -4.542190               | -1.453602 | 2.224919  |
| 23            | 6             | 0           | 0.489028                | 2.924778  | -0.449394 |
| 24            | 1             | 0           | 0.157616                | 3.669079  | -1.177864 |
| 25            | 1             | 0           | 0.742286                | 3.436758  | 0.479489  |
| 26            | 1             | 0           | 1.397534                | 2.458663  | -0.840640 |
| 27            | 6             | 0           | 0.445275                | -2.050281 | -1.461677 |
| 28            | 1             | 0           | -0.620651               | -2.210654 | -1.280767 |
| 29            | 1             | 0           | 0.674825                | -2.069872 | -2.524418 |
| 30            | 1             | 0           | 0.952444                | -2.885649 | -0.966712 |

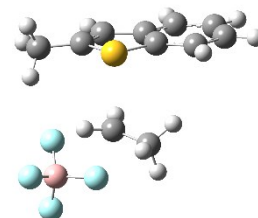

TS: F<sub>5</sub>Sb-F-CH<sub>2</sub>-CH<sub>2</sub>-CH<sub>2</sub>-CH<sub>3</sub> + 2-mbt --> 1e2-mbt BF<sub>4</sub>

Sum of electronic and zero-point Energies= -1327.830369 (Hartree/particle)

Sum of electronic and thermal Free Energies= -1327.883504 (Hartree/particle)

1 imaginary frequency (367.1129i cm<sup>-1</sup>)

Standard orientation:

| Center Number | Atomic Number | Atomic Type | Coordinates (Angstroms) |           |           |
|---------------|---------------|-------------|-------------------------|-----------|-----------|
|               |               |             | X                       | Y         | Z         |
| 1             | 6             | 0           | -2.353120               | 0.017231  | 0.370808  |
| 2             | 6             | 0           | -2.407979               | -1.189591 | -0.349742 |
| 3             | 6             | 0           | -1.499063               | -2.183464 | 0.180706  |
| 4             | 6             | 0           | -0.787039               | -1.763293 | 1.246601  |
| 5             | 16            | 0           | -1.184273               | -0.091718 | 1.673312  |
| 6             | 1             | 0           | -1.385735               | -3.174914 | -0.242609 |
| 7             | 6             | 0           | 0.849166                | 0.613323  | 0.026918  |
| 8             | 1             | 0           | 1.428656                | 0.295897  | 0.885318  |

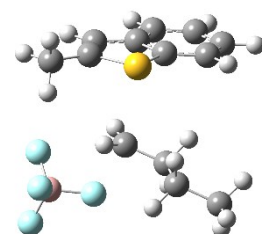

|    |   |   |           |           |           |
|----|---|---|-----------|-----------|-----------|
| 9  | 1 | 0 | 0.383459  | -0.152772 | -0.582481 |
| 10 | 6 | 0 | -3.133725 | 1.121379  | 0.035207  |
| 11 | 1 | 0 | -3.085781 | 2.039237  | 0.610952  |
| 12 | 9 | 0 | 3.697614  | -0.718778 | 0.574482  |
| 13 | 9 | 0 | 2.341229  | -1.879230 | -0.860608 |
| 14 | 9 | 0 | 4.289469  | -0.934558 | -1.636879 |
| 15 | 9 | 0 | 2.517291  | 0.401454  | -1.042386 |
| 16 | 5 | 0 | 3.246548  | -0.829619 | -0.736870 |
| 17 | 6 | 0 | -3.985377 | 1.006493  | -1.055734 |
| 18 | 1 | 0 | -4.604600 | 1.849956  | -1.339237 |
| 19 | 6 | 0 | -3.277330 | -1.281227 | -1.443731 |
| 20 | 1 | 0 | -3.334465 | -2.203398 | -2.012214 |
| 21 | 6 | 0 | -4.055260 | -0.186263 | -1.788262 |
| 22 | 1 | 0 | -4.729077 | -0.252231 | -2.635066 |
| 23 | 6 | 0 | 0.261558  | -2.481462 | 2.027876  |
| 24 | 1 | 0 | -0.024358 | -2.584859 | 3.077547  |
| 25 | 1 | 0 | 0.412628  | -3.476589 | 1.608134  |
| 26 | 1 | 0 | 1.216143  | -1.948457 | 1.993814  |
| 27 | 6 | 0 | 0.588105  | 2.032296  | -0.238521 |
| 28 | 1 | 0 | -0.501868 | 2.165471  | -0.282205 |
| 29 | 1 | 0 | 0.902160  | 2.209301  | -1.276643 |
| 30 | 6 | 0 | 1.251981  | 3.001837  | 0.730076  |
| 31 | 1 | 0 | 2.330363  | 2.817197  | 0.732960  |
| 32 | 1 | 0 | 0.891234  | 2.800391  | 1.743825  |
| 33 | 6 | 0 | 0.968423  | 4.449677  | 0.351243  |
| 34 | 1 | 0 | 1.436627  | 5.140248  | 1.055346  |
| 35 | 1 | 0 | 1.353845  | 4.675915  | -0.646518 |
| 36 | 1 | 0 | -0.106077 | 4.653567  | 0.348297  |

TS: NCS-CH<sub>3</sub> + 2,5- dmt --> 1,2,5-tmt NCS

Sum of electronic and zero-point Energies= -1162.273053 (Hartree/particle)

Sum of electronic and thermal Free Energies= -1162.316901 (Hartree/particle)

One imaginary frequency (539.7423 cm<sup>-1</sup>)

Standard orientation:

| Center<br>Number | Atomic<br>Number | Atomic<br>Type | Coordinates (Angstroms) |           |           |
|------------------|------------------|----------------|-------------------------|-----------|-----------|
|                  |                  |                | X                       | Y         | Z         |
| 1                | 6                | 0              | -2.165057               | -0.928098 | 0.272815  |
| 2                | 6                | 0              | -2.409905               | -0.097683 | 1.307920  |
| 3                | 6                | 0              | -1.948222               | 1.259044  | 1.105854  |
| 4                | 6                | 0              | -1.350074               | 1.470790  | -0.084904 |
| 5                | 16               | 0              | -1.360440               | -0.029553 | -1.015538 |
| 6                | 1                | 0              | -2.905005               | -0.430217 | 2.212739  |
| 7                | 1                | 0              | -2.059158               | 2.042048  | 1.846740  |
| 8                | 6                | 0              | 0.722306                | -0.640310 | -0.564972 |
| 9                | 1                | 0              | 1.168414                | 0.060751  | -1.255165 |
| 10               | 1                | 0              | 0.632094                | -0.390829 | 0.482719  |
| 11               | 1                | 0              | 0.594317                | -1.664550 | -0.884643 |
| 12               | 6                | 0              | -2.447469               | -2.382987 | 0.106980  |
| 13               | 1                | 0              | -3.086697               | -2.574303 | -0.757867 |
| 14               | 1                | 0              | -1.524555               | -2.954583 | -0.026401 |
| 15               | 1                | 0              | -2.952418               | -2.756176 | 0.998848  |
| 16               | 6                | 0              | -0.707966               | 2.693841  | -0.646468 |
| 17               | 1                | 0              | -0.808183               | 3.512419  | 0.067283  |
| 18               | 1                | 0              | 0.358334                | 2.533148  | -0.831940 |
| 19               | 1                | 0              | -1.171422               | 2.996084  | -1.588367 |
| 20               | 16               | 0              | 3.094369                | -1.262520 | 0.003043  |
| 21               | 6                | 0              | 3.419531                | 0.326471  | 0.392559  |
| 22               | 7                | 0              | 3.618936                | 1.441850  | 0.656752  |

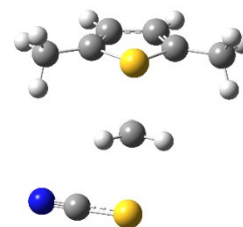

-----  
Solvolysis

Basic aqueous

Thiophenium cations + nucleophile

1,2,5-tmt OH (in water)

Sum of electronic and zero-point Energies= -747.031515 (Hartree/particle)

Sum of electronic and thermal Free Energies= -747.071167 (Hartree/particle)

No imaginary frequencies

Standard orientation:

-----

| Center Number | Atomic Number | Atomic Type | Coordinates (Angstroms) |           |           |
|---------------|---------------|-------------|-------------------------|-----------|-----------|
|               |               |             | X                       | Y         | Z         |
| 1             | 6             | 0           | 1.032975                | 1.301232  | 0.063423  |
| 2             | 6             | 0           | 1.868933                | 0.730345  | 0.940553  |
| 3             | 6             | 0           | 1.869367                | -0.729540 | 0.940485  |
| 4             | 6             | 0           | 1.033749                | -1.300843 | 0.063294  |
| 5             | 16            | 0           | 0.265284                | 0.000004  | -0.898132 |
| 6             | 1             | 0           | 2.482195                | 1.316817  | 1.614203  |
| 7             | 1             | 0           | 2.483008                | -1.315755 | 1.614018  |
| 8             | 6             | 0           | -1.442808               | -0.000499 | -0.269279 |
| 9             | 1             | 0           | -1.922145               | -0.894181 | -0.664243 |
| 10            | 1             | 0           | -1.410568               | -0.000648 | 0.817695  |
| 11            | 1             | 0           | -1.922562               | 0.893079  | -0.663994 |
| 12            | 6             | 0           | 0.696306                | 2.720424  | -0.223494 |
| 13            | 1             | 0           | -0.364523               | 2.915097  | -0.044812 |
| 14            | 1             | 0           | 1.282753                | 3.360060  | 0.436520  |
| 15            | 1             | 0           | 0.921187                | 2.984238  | -1.258903 |
| 16            | 6             | 0           | 0.697994                | -2.720226 | -0.223789 |
| 17            | 1             | 0           | 1.284676                | -3.359551 | 0.436313  |
| 18            | 1             | 0           | -0.362762               | -2.915546 | -0.045378 |
| 19            | 1             | 0           | 0.923274                | -2.983839 | -1.259165 |
| 20            | 8             | 0           | -4.636657               | 0.001370  | 0.532005  |
| 21            | 1             | 0           | -5.084916               | -0.016155 | 1.384658  |

-----

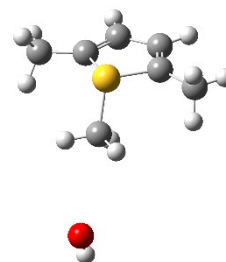

1,3-dmt OH (in water)

Sum of electronic and zero-point Energies= -707.748375 (Hartree/particle)

Sum of electronic and thermal Free Energies= -707.786623 (Hartree/particle)

No imaginary frequencies

Standard orientation:

-----

| Center Number | Atomic Number | Atomic Type | Coordinates (Angstroms) |           |           |
|---------------|---------------|-------------|-------------------------|-----------|-----------|
|               |               |             | X                       | Y         | Z         |
| 1             | 6             | 0           | -0.938786               | 0.516695  | -0.905940 |
| 2             | 6             | 0           | -1.856154               | 0.480632  | 0.072449  |
| 3             | 6             | 0           | -1.638187               | -0.626235 | 1.017233  |
| 4             | 6             | 0           | -0.585114               | -1.396844 | 0.737257  |
| 5             | 16            | 0           | 0.158740                | -0.860991 | -0.778913 |
| 6             | 1             | 0           | -2.280971               | -0.786371 | 1.874689  |
| 7             | 1             | 0           | -0.184646               | -2.266026 | 1.239365  |
| 8             | 6             | 0           | 1.731687                | -0.124303 | -0.223324 |
| 9             | 1             | 0           | 2.381433                | -0.953563 | 0.048192  |

-----

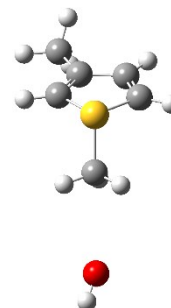

|    |   |   |           |          |           |
|----|---|---|-----------|----------|-----------|
| 10 | 1 | 0 | 2.137105  | 0.416198 | -1.075775 |
| 11 | 1 | 0 | 1.525998  | 0.531172 | 0.619193  |
| 12 | 6 | 0 | -2.983308 | 1.443695 | 0.230559  |
| 13 | 1 | 0 | -3.935207 | 0.908173 | 0.205557  |
| 14 | 1 | 0 | -2.912784 | 1.941407 | 1.200698  |
| 15 | 1 | 0 | -2.974410 | 2.194195 | -0.558435 |
| 16 | 1 | 0 | -0.835136 | 1.190176 | -1.745034 |
| 17 | 8 | 0 | 4.584862  | 0.949946 | 0.588661  |
| 18 | 1 | 0 | 5.479052  | 1.239094 | 0.375472  |

### 1m2-et OH (in water)

Sum of electronic and zero-point Energies= -747.024348 (Hartree/particle)

Sum of electronic and thermal Free Energies= -747.047363 (Hartree/particle)

No imaginary frequencies

Standard orientation:

| Center Number | Atomic Number | Atomic Type | Coordinates (Angstroms) |           |           |
|---------------|---------------|-------------|-------------------------|-----------|-----------|
|               |               |             | X                       | Y         | Z         |
| 1             | 6             | 0           | 0.229079                | -0.713690 | -0.100626 |
| 2             | 6             | 0           | -0.626368               | -1.746553 | -0.112200 |
| 3             | 6             | 0           | -2.035563               | -1.378461 | -0.219615 |
| 4             | 6             | 0           | -2.252640               | -0.060735 | -0.280868 |
| 5             | 16            | 0           | -0.707947               | 0.803425  | -0.316087 |
| 6             | 1             | 0           | -0.299672               | -2.775860 | -0.031333 |
| 7             | 1             | 0           | -2.833456               | -2.110230 | -0.237116 |
| 8             | 1             | 0           | -3.171663               | 0.500635  | -0.367416 |
| 9             | 6             | 0           | 1.715411                | -0.650969 | 0.015916  |
| 10            | 1             | 0           | 2.126057                | -0.213815 | -0.899599 |
| 11            | 1             | 0           | 1.980511                | 0.035096  | 0.827324  |
| 12            | 6             | 0           | 2.320406                | -2.027735 | 0.264223  |
| 13            | 1             | 0           | 3.404151                | -1.943287 | 0.351342  |
| 14            | 1             | 0           | 1.937972                | -2.466838 | 1.188016  |
| 15            | 1             | 0           | 2.098896                | -2.710527 | -0.558560 |
| 16            | 6             | 0           | -0.636972               | 1.528586  | 1.350612  |
| 17            | 1             | 0           | -1.333674               | 2.364777  | 1.359593  |
| 18            | 1             | 0           | -0.914411               | 0.761349  | 2.069983  |
| 19            | 1             | 0           | 0.383296                | 1.881612  | 1.479074  |
| 20            | 8             | 0           | 1.744183                | 2.755982  | -0.550077 |
| 21            | 1             | 0           | 1.715557                | 2.071764  | -1.227958 |

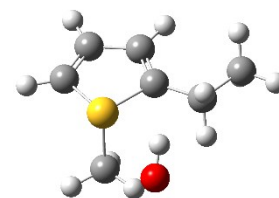

### 1-mbt OH (in water)

Sum of electronic and zero-point Energies= -822.049859 (Hartree/particle)

Sum of electronic and thermal Free Energies= -822.080955 (Hartree/particle)

No imaginary frequencies

Standard orientation:

| Center Number | Atomic Number | Atomic Type | Coordinates (Angstroms) |           |           |
|---------------|---------------|-------------|-------------------------|-----------|-----------|
|               |               |             | X                       | Y         | Z         |
| 1             | 6             | 0           | 1.323467                | 0.604703  | 0.504740  |
| 2             | 6             | 0           | 0.632040                | -0.072993 | -0.504101 |
| 3             | 6             | 0           | 1.007290                | -1.308210 | -0.996474 |
| 4             | 6             | 0           | 2.138148                | -1.892201 | -0.426211 |
| 5             | 6             | 0           | 2.850577                | -1.239921 | 0.580546  |
| 6             | 6             | 0           | 2.455637                | 0.009347  | 1.051928  |
| 7             | 6             | 0           | 0.708834                | 1.886486  | 0.847105  |
| 8             | 6             | 0           | -0.394172               | 2.173283  | 0.153340  |
| 9             | 1             | 0           | 0.455577                | -1.803358 | -1.786805 |

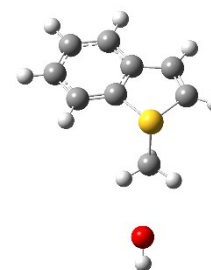

|    |    |   |           |           |           |
|----|----|---|-----------|-----------|-----------|
| 10 | 1  | 0 | 2.466660  | -2.862615 | -0.778046 |
| 11 | 1  | 0 | 3.729106  | -1.714199 | 1.001544  |
| 12 | 1  | 0 | 3.012572  | 0.513868  | 1.832836  |
| 13 | 1  | 0 | 1.114268  | 2.546475  | 1.604453  |
| 14 | 1  | 0 | -1.039996 | 3.038718  | 0.185464  |
| 15 | 16 | 0 | -0.751664 | 0.906566  | -1.049130 |
| 16 | 6  | 0 | -2.165423 | 0.029577  | -0.308325 |
| 17 | 1  | 0 | -1.941119 | -0.166024 | 0.737312  |
| 18 | 1  | 0 | -2.291268 | -0.888083 | -0.880037 |
| 19 | 1  | 0 | -3.032345 | 0.676765  | -0.426557 |
| 20 | 8  | 0 | -4.543985 | -1.624118 | 1.094920  |
| 21 | 1  | 0 | -5.433337 | -1.994093 | 1.121275  |

### 1,2-dmbt OH in water

Sum of electronic and zero-point Energies= -861.334373 (Hartree/particle)

Sum of electronic and thermal Free Energies= -861.362566 (Hartree/particle)

No imaginary frequencies

Standard orientation:

| Center Number | Atomic Number | Atomic Type | Coordinates (Angstroms) |           |           |
|---------------|---------------|-------------|-------------------------|-----------|-----------|
|               |               |             | X                       | Y         | Z         |
| 1             | 6             | 0           | -0.832770               | -1.172270 | -0.057796 |
| 2             | 6             | 0           | -0.596478               | 0.207534  | -0.100861 |
| 3             | 6             | 0           | -1.606295               | 1.150062  | -0.039271 |
| 4             | 6             | 0           | -2.913215               | 0.678016  | 0.079157  |
| 5             | 6             | 0           | -3.177604               | -0.691094 | 0.116385  |
| 6             | 6             | 0           | -2.146187               | -1.623254 | 0.046935  |
| 7             | 6             | 0           | 0.392038                | -1.965081 | -0.115059 |
| 8             | 6             | 0           | 1.517284                | -1.247209 | -0.183955 |
| 9             | 1             | 0           | -1.380583               | 2.206931  | -0.085626 |
| 10            | 1             | 0           | -3.730068               | 1.387586  | 0.137395  |
| 11            | 1             | 0           | -4.201792               | -1.035521 | 0.201243  |
| 12            | 1             | 0           | -2.353398               | -2.686911 | 0.075879  |
| 13            | 1             | 0           | 0.386401                | -3.048929 | -0.088605 |
| 14            | 16            | 0           | 1.149675                | 0.519344  | -0.290963 |
| 15            | 6             | 0           | 1.659579                | 1.018589  | 1.379399  |
| 16            | 1             | 0           | 2.747838                | 1.063606  | 1.377861  |
| 17            | 1             | 0           | 1.290271                | 0.283717  | 2.091827  |
| 18            | 1             | 0           | 1.237140                | 2.005633  | 1.539093  |
| 19            | 6             | 0           | 2.943537                | -1.668718 | -0.224679 |
| 20            | 1             | 0           | 3.491810                | -1.279107 | 0.637829  |
| 21            | 1             | 0           | 2.999894                | -2.757358 | -0.206654 |
| 22            | 1             | 0           | 3.439225                | -1.306389 | -1.128387 |
| 23            | 8             | 0           | 0.749589                | 3.133795  | -0.657985 |
| 24            | 1             | 0           | 0.242418                | 3.667433  | -0.034087 |

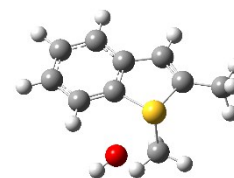

### 1e2-mbt OH in water

Sum of electronic and zero-point Energies= -900.613943 (Hartree/particle)

Sum of electronic and thermal Free Energies= -900.654818 (Hartree/particle)

No imaginary frequencies

Standard orientation:

| Center Number | Atomic Number | Atomic Type | Coordinates (Angstroms) |           |           |
|---------------|---------------|-------------|-------------------------|-----------|-----------|
|               |               |             | X                       | Y         | Z         |
| 1             | 6             | 0           | 0.952611                | -1.196196 | -0.164621 |
| 2             | 6             | 0           | 0.713704                | 0.180853  | -0.248523 |

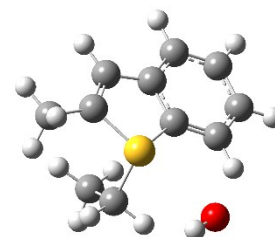

|    |    |   |           |           |           |
|----|----|---|-----------|-----------|-----------|
| 3  | 6  | 0 | 1.703535  | 1.135926  | -0.108265 |
| 4  | 6  | 0 | 2.997732  | 0.675503  | 0.134613  |
| 5  | 6  | 0 | 3.267442  | -0.690919 | 0.214778  |
| 6  | 6  | 0 | 2.254228  | -1.634420 | 0.064414  |
| 7  | 6  | 0 | -0.260345 | -1.995607 | -0.318425 |
| 8  | 6  | 0 | -1.378486 | -1.286706 | -0.506167 |
| 9  | 1  | 0 | 1.462213  | 2.188030  | -0.189881 |
| 10 | 1  | 0 | 3.801113  | 1.392431  | 0.255789  |
| 11 | 1  | 0 | 4.282609  | -1.024532 | 0.396560  |
| 12 | 1  | 0 | 2.467156  | -2.695434 | 0.127757  |
| 13 | 1  | 0 | -0.255795 | -3.078688 | -0.268565 |
| 14 | 16 | 0 | -1.004794 | 0.473521  | -0.601301 |
| 15 | 6  | 0 | -1.710161 | 1.069997  | 0.998093  |
| 16 | 1  | 0 | -2.779085 | 1.148826  | 0.790754  |
| 17 | 1  | 0 | -1.290805 | 2.071734  | 1.070622  |
| 18 | 6  | 0 | -2.797032 | -1.711737 | -0.643981 |
| 19 | 1  | 0 | -3.216757 | -1.395841 | -1.601851 |
| 20 | 1  | 0 | -2.856869 | -2.798103 | -0.574133 |
| 21 | 1  | 0 | -3.412531 | -1.278526 | 0.150788  |
| 22 | 6  | 0 | -1.399502 | 0.187096  | 2.183316  |
| 23 | 1  | 0 | -1.794374 | 0.683564  | 3.072544  |
| 24 | 1  | 0 | -1.872749 | -0.792143 | 2.105457  |
| 25 | 1  | 0 | -0.324720 | 0.058186  | 2.325289  |
| 26 | 8  | 0 | -0.362112 | 3.274373  | -0.827719 |
| 27 | 1  | 0 | -1.298158 | 3.346430  | -1.049947 |

1b2-mbt OH (in water)

Sum of electronic and zero-point Energies= -979.158770 (Hartree/particle)

Sum of electronic and thermal Free Energies= -979.202416 (Hartree/particle)

No imaginary frequencies

Standard orientation:

| Center<br>Number | Atomic<br>Number | Atomic<br>Type | Coordinates (Angstroms) |           |           |
|------------------|------------------|----------------|-------------------------|-----------|-----------|
|                  |                  |                | X                       | Y         | Z         |
| 1                | 6                | 0              | 1.515615                | 0.310487  | -1.067049 |
| 2                | 6                | 0              | 1.222755                | 0.027478  | 0.273286  |
| 3                | 6                | 0              | 1.860762                | -0.964135 | 0.995965  |
| 4                | 6                | 0              | 2.831234                | -1.711534 | 0.328808  |
| 5                | 6                | 0              | 3.147481                | -1.447323 | -1.004067 |
| 6                | 6                | 0              | 2.498961                | -0.437065 | -1.709405 |
| 7                | 6                | 0              | 0.696040                | 1.386085  | -1.617983 |
| 8                | 6                | 0              | -0.193194               | 1.902325  | -0.764350 |
| 9                | 1                | 0              | 1.607651                | -1.135800 | 2.033685  |
| 10               | 1                | 0              | 3.348070                | -2.502781 | 0.858995  |
| 11               | 1                | 0              | 3.911775                | -2.036334 | -1.497795 |
| 12               | 1                | 0              | 2.747146                | -0.231474 | -2.744553 |
| 13               | 1                | 0              | 0.791356                | 1.726657  | -2.642891 |
| 14               | 16               | 0              | -0.016905               | 1.158647  | 0.867339  |
| 15               | 6                | 0              | -1.577185               | 0.182128  | 0.963107  |
| 16               | 1                | 0              | -2.342896               | 0.951003  | 1.095466  |
| 17               | 1                | 0              | -1.460616               | -0.364074 | 1.897883  |
| 18               | 6                | 0              | -1.234838               | 2.946633  | -0.954073 |
| 19               | 1                | 0              | -1.124352               | 3.758923  | -0.232273 |
| 20               | 1                | 0              | -1.153334               | 3.357249  | -1.960825 |
| 21               | 1                | 0              | -2.236917               | 2.523206  | -0.833305 |
| 22               | 6                | 0              | -1.843375               | -0.710698 | -0.230724 |
| 23               | 1                | 0              | -1.901758               | -0.118154 | -1.148346 |
| 24               | 1                | 0              | -1.027805               | -1.430563 | -0.350251 |
| 25               | 8                | 0              | 0.407789                | 0.108573  | 3.446968  |

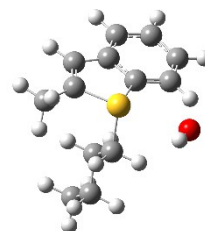

|    |   |   |           |           |           |
|----|---|---|-----------|-----------|-----------|
| 26 | 1 | 0 | -0.171642 | 0.824674  | 3.733675  |
| 27 | 6 | 0 | -3.160610 | -1.462327 | -0.026926 |
| 28 | 1 | 0 | -3.970800 | -0.738938 | 0.108706  |
| 29 | 1 | 0 | -3.104837 | -2.049949 | 0.894618  |
| 30 | 6 | 0 | -3.471900 | -2.374355 | -1.207571 |
| 31 | 1 | 0 | -2.690276 | -3.127201 | -1.340038 |
| 32 | 1 | 0 | -4.419505 | -2.897892 | -1.063842 |
| 33 | 1 | 0 | -3.543555 | -1.801692 | -2.136183 |

## TS basic hydrolysis

TS: 1,2,5-tmt OH --> 2,5-dmt + CH<sub>3</sub>OH (in water)

Sum of electronic and zero-point Energies= -747.016431 (Hartree/particle)

Sum of electronic and thermal Free Energies= -747.053503 (Hartree/particle)

1 imaginary frequency (613.5808i) cm-1

Standard orientation:

| Center Number | Atomic Number | Atomic Type | Coordinates (Angstroms) |           |           |
|---------------|---------------|-------------|-------------------------|-----------|-----------|
|               |               |             | X                       | Y         | Z         |
| 1             | 6             | 0           | 0.935928                | 1.278443  | 0.025380  |
| 2             | 6             | 0           | 1.677416                | 0.717165  | 1.000110  |
| 3             | 6             | 0           | 1.669600                | -0.732654 | 1.000957  |
| 4             | 6             | 0           | 0.921873                | -1.287079 | 0.027016  |
| 5             | 16            | 0           | 0.207968                | -0.001019 | -0.957442 |
| 6             | 1             | 0           | 2.224679                | 1.308545  | 1.724430  |
| 7             | 1             | 0           | 2.210941                | -1.329039 | 1.725622  |
| 8             | 6             | 0           | -1.738398               | 0.012579  | -0.127730 |
| 9             | 1             | 0           | -2.073868               | -0.915451 | -0.565191 |
| 10            | 1             | 0           | -1.434227               | 0.020302  | 0.908441  |
| 11            | 1             | 0           | -2.067843               | 0.934261  | -0.582217 |
| 12            | 6             | 0           | 0.664115                | 2.707925  | -0.294195 |
| 13            | 1             | 0           | -0.406833               | 2.925478  | -0.258832 |
| 14            | 1             | 0           | 1.167874                | 3.340723  | 0.437009  |
| 15            | 1             | 0           | 1.026387                | 2.970998  | -1.290363 |
| 16            | 6             | 0           | 0.636886                | -2.714038 | -0.292393 |
| 17            | 1             | 0           | 1.133620                | -3.351414 | 0.439647  |
| 18            | 1             | 0           | -0.436001               | -2.921777 | -0.258537 |
| 19            | 1             | 0           | 0.998140                | -2.980772 | -1.287961 |
| 20            | 8             | 0           | -3.747808               | 0.028353  | 0.786237  |
| 21            | 1             | 0           | -4.292413               | -0.106416 | 0.002262  |

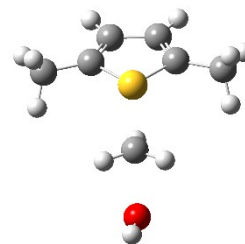

TS: 1,3-dmt OH --> 3-mt + CH<sub>3</sub>OH (in water)

Sum of electronic and zero-point Energies= -707.734472 (Hartree/particle)

Sum of electronic and thermal Free Energies= -707.769879 (Hartree/particle)

1 imaginary frequency (595.8473i) cm-1

Standard orientation:

| Center Number | Atomic Number | Atomic Type | Coordinates (Angstroms) |           |           |
|---------------|---------------|-------------|-------------------------|-----------|-----------|
|               |               |             | X                       | Y         | Z         |
| 1             | 6             | 0           | -0.857259               | 0.278856  | -1.014165 |
| 2             | 6             | 0           | -1.719839               | 0.442634  | 0.009733  |
| 3             | 6             | 0           | -1.478058               | -0.506401 | 1.090751  |
| 4             | 6             | 0           | -0.457862               | -1.348995 | 0.859549  |
| 5             | 16            | 0           | 0.249295                | -1.045339 | -0.716327 |
| 6             | 1             | 0           | -2.068300               | -0.520389 | 1.999240  |
| 7             | 1             | 0           | -0.055469               | -2.137723 | 1.478796  |
| 8             | 6             | 0           | 1.970370                | 0.023477  | -0.113008 |

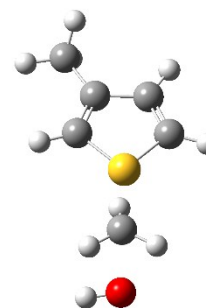



|    |   |   |           |           |           |
|----|---|---|-----------|-----------|-----------|
| 9  | 1 | 0 | 2.515254  | -0.809004 | 0.304194  |
| 10 | 1 | 0 | 2.264084  | 0.374508  | -1.090301 |
| 11 | 1 | 0 | 1.464047  | 0.701638  | 0.556616  |
| 12 | 6 | 0 | -2.802039 | 1.470932  | 0.071330  |
| 13 | 1 | 0 | -3.776600 | 0.990834  | 0.187562  |
| 14 | 1 | 0 | -2.654519 | 2.121241  | 0.937012  |
| 15 | 1 | 0 | -2.816940 | 2.084124  | -0.829177 |
| 16 | 1 | 0 | -0.788084 | 0.828238  | -1.942382 |
| 17 | 8 | 0 | 3.776335  | 1.133058  | 0.562494  |
| 18 | 1 | 0 | 3.785245  | 1.864466  | -0.065424 |

TS: 2e1-mt OH --> 2-et + CH<sub>3</sub>OH (in water)

Sum of electronic and zero-point Energies=-747.008983 (Hartree/particle)

Sum of electronic and thermal Free Energies=-747.060986 (Hartree/particle)

1 imaginary frequency (602.7515i cm-1)

Standard orientation:

| Center Number | Atomic Number | Atomic Type | Coordinates (Angstroms) |           |           |
|---------------|---------------|-------------|-------------------------|-----------|-----------|
|               |               |             | X                       | Y         | Z         |
| 1             | 6             | 0           | -1.014856               | -0.042338 | -0.143982 |
| 2             | 6             | 0           | -1.427115               | 0.786788  | 0.836627  |
| 3             | 6             | 0           | -0.677709               | 2.026506  | 0.919539  |
| 4             | 6             | 0           | 0.301884                | 2.127209  | 0.003247  |
| 5             | 16            | 0           | 0.318016                | 0.714269  | -1.031046 |
| 6             | 1             | 0           | -2.237766               | 0.541913  | 1.511628  |
| 7             | 1             | 0           | -0.882535               | 2.797060  | 1.651804  |
| 8             | 1             | 0           | 1.007088                | 2.926325  | -0.173892 |
| 9             | 6             | 0           | -1.462735               | -1.416376 | -0.528238 |
| 10            | 1             | 0           | -1.736934               | -1.423523 | -1.587427 |
| 11            | 1             | 0           | -0.613840               | -2.102721 | -0.426568 |
| 12            | 6             | 0           | -2.630416               | -1.902680 | 0.320765  |
| 13            | 1             | 0           | -2.922043               | -2.907379 | 0.012237  |
| 14            | 1             | 0           | -2.363656               | -1.937815 | 1.379107  |
| 15            | 1             | 0           | -3.497692               | -1.248563 | 0.208554  |
| 16            | 6             | 0           | 1.901625                | -0.393310 | -0.181683 |
| 17            | 1             | 0           | 2.712008                | 0.234187  | -0.518666 |
| 18            | 1             | 0           | 1.570619                | -0.316351 | 0.842884  |
| 19            | 1             | 0           | 1.724521                | -1.313099 | -0.718385 |
| 20            | 8             | 0           | 3.527736                | -1.607563 | 0.715996  |
| 21            | 1             | 0           | 3.986025                | -0.932622 | 1.229843  |

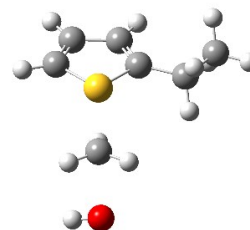

TS: 1-mbt OH --> bt + CH<sub>3</sub>OH (in water)

Sum of electronic and zero-point Energies=-822.035217 (Hartree/particle)

Sum of electronic and thermal Free Energies=-822.071910 (Hartree/particle)

1 imaginary frequency (599.6117i cm-1)

Standard orientation:

| Center Number | Atomic Number | Atomic Type | Coordinates (Angstroms) |           |           |
|---------------|---------------|-------------|-------------------------|-----------|-----------|
|               |               |             | X                       | Y         | Z         |
| 1             | 6             | 0           | 1.200326                | 0.741322  | 0.421703  |
| 2             | 6             | 0           | 0.567059                | -0.065870 | -0.533320 |
| 3             | 6             | 0           | 1.072538                | -1.291944 | -0.940355 |
| 4             | 6             | 0           | 2.266309                | -1.712469 | -0.362736 |
| 5             | 6             | 0           | 2.923174                | -0.921252 | 0.585267  |
| 6             | 6             | 0           | 2.401271                | 0.302950  | 0.982762  |
| 7             | 6             | 0           | 0.457950                | 1.964324  | 0.690040  |
| 8             | 6             | 0           | -0.674352               | 2.073792  | -0.019235 |

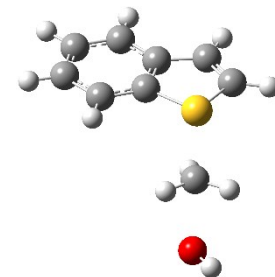

|    |    |   |           |           |           |
|----|----|---|-----------|-----------|-----------|
| 9  | 1  | 0 | 0.564563  | -1.897889 | -1.681492 |
| 10 | 1  | 0 | 2.692396  | -2.664262 | -0.657343 |
| 11 | 1  | 0 | 3.854601  | -1.270219 | 1.015788  |
| 12 | 1  | 0 | 2.910851  | 0.914122  | 1.719000  |
| 13 | 1  | 0 | 0.791467  | 2.713758  | 1.397291  |
| 14 | 1  | 0 | -1.407957 | 2.867445  | -0.020467 |
| 15 | 16 | 0 | -0.923307 | 0.695565  | -1.095231 |
| 16 | 6  | 0 | -2.332594 | -0.428868 | 0.016713  |
| 17 | 1  | 0 | -1.854230 | -0.311835 | 0.977226  |
| 18 | 1  | 0 | -2.203200 | -1.354978 | -0.522283 |
| 19 | 1  | 0 | -3.196049 | 0.177432  | -0.211034 |
| 20 | 8  | 0 | -3.762360 | -1.596918 | 1.219778  |
| 21 | 1  | 0 | -4.570735 | -1.499184 | 0.703760  |

TS: 1,2-dmbt OH --> 2-mbt + CH<sub>3</sub>OH (in water)

Sum of electronic and zero-point Energies= -861.303899 (Hartree/particle)

Sum of electronic and thermal Free Energies= -861.342852 (Hartree/particle)

1 imaginary frequency (468.3193i cm<sup>-1</sup>)

Standard orientation:

| Center Number | Atomic Number | Atomic Type | Coordinates (Angstroms) |           |           |
|---------------|---------------|-------------|-------------------------|-----------|-----------|
|               |               |             | X                       | Y         | Z         |
| 1             | 6             | 0           | 1.221255                | 0.773083  | 0.408258  |
| 2             | 6             | 0           | 0.796302                | -0.186831 | -0.519913 |
| 3             | 6             | 0           | 1.576740                | -1.264264 | -0.908447 |
| 4             | 6             | 0           | 2.839537                | -1.377693 | -0.332970 |
| 5             | 6             | 0           | 3.291584                | -0.430213 | 0.589155  |
| 6             | 6             | 0           | 2.494855                | 0.646129  | 0.963705  |
| 7             | 6             | 0           | 0.209869                | 1.790198  | 0.659493  |
| 8             | 6             | 0           | -0.932122               | 1.631176  | -0.026126 |
| 9             | 1             | 0           | 1.221667                | -1.991511 | -1.629580 |
| 10            | 1             | 0           | 3.476127                | -2.210439 | -0.608134 |
| 11            | 1             | 0           | 4.280401                | -0.537223 | 1.020665  |
| 12            | 1             | 0           | 2.852231                | 1.377707  | 1.679993  |
| 13            | 1             | 0           | 0.358648                | 2.608437  | 1.354922  |
| 14            | 16            | 0           | -0.837284               | 0.189721  | -1.080588 |
| 15            | 6             | 0           | -1.936265               | -1.121956 | -0.013411 |
| 16            | 1             | 0           | -2.933098               | -0.737858 | -0.169844 |
| 17            | 1             | 0           | -1.509916               | -0.986758 | 0.970766  |
| 18            | 1             | 0           | -1.704720               | -2.043919 | -0.525182 |
| 19            | 6             | 0           | -2.190000               | 2.427310  | -0.019412 |
| 20            | 1             | 0           | -3.045404               | 1.813552  | 0.276298  |
| 21            | 1             | 0           | -2.092587               | 3.246579  | 0.693422  |
| 22            | 1             | 0           | -2.401285               | 2.845133  | -1.006673 |
| 23            | 8             | 0           | -3.293658               | -2.610231 | 1.061124  |
| 24            | 1             | 0           | -2.986779               | -2.859021 | 1.941772  |

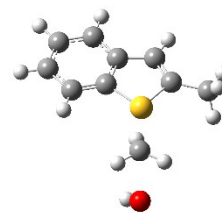

TS: 1e2-mbt OH --> 2-mbt + CH<sub>3</sub>CH<sub>2</sub>OH (in water)

Sum of electronic and zero-point Energies= -900.593185 (Hartree/particle)

Sum of electronic and thermal Free Energies= -900.633269 (Hartree/particle)

1 imaginary frequency (554.9707 i cm<sup>-1</sup>)

Standard orientation:

| Center Number | Atomic Number | Atomic Type | Coordinates (Angstroms) |          |          |
|---------------|---------------|-------------|-------------------------|----------|----------|
|               |               |             | X                       | Y        | Z        |
| 1             | 6             | 0           | -1.502599               | 0.691525 | 0.331974 |

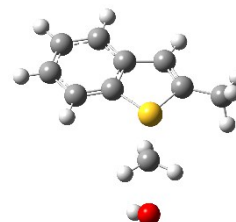

|    |    |   |           |           |           |
|----|----|---|-----------|-----------|-----------|
| 2  | 6  | 0 | -0.954201 | -0.221918 | -0.581498 |
| 3  | 6  | 0 | -1.587126 | -1.406295 | -0.933560 |
| 4  | 6  | 0 | -2.818657 | -1.675051 | -0.344677 |
| 5  | 6  | 0 | -3.389446 | -0.776151 | 0.562570  |
| 6  | 6  | 0 | -2.742680 | 0.404714  | 0.905461  |
| 7  | 6  | 0 | -0.636474 | 1.837202  | 0.556408  |
| 8  | 6  | 0 | 0.510386  | 1.811739  | -0.142989 |
| 9  | 1  | 0 | -1.143102 | -2.096904 | -1.641357 |
| 10 | 1  | 0 | -3.340358 | -2.590657 | -0.597062 |
| 11 | 1  | 0 | -4.351818 | -1.006161 | 1.005195  |
| 12 | 1  | 0 | -3.186520 | 1.097768  | 1.611474  |
| 13 | 1  | 0 | -0.886607 | 2.643416  | 1.236251  |
| 14 | 16 | 0 | 0.601384  | 0.358775  | -1.164293 |
| 15 | 6  | 0 | 2.057137  | -0.881184 | -0.038838 |
| 16 | 1  | 0 | 2.891639  | -0.342876 | -0.460748 |
| 17 | 1  | 0 | 1.750576  | -1.781671 | -0.551503 |
| 18 | 6  | 0 | 1.658101  | 2.760006  | -0.147379 |
| 19 | 1  | 0 | 1.826953  | 3.177343  | -1.142548 |
| 20 | 1  | 0 | 1.455422  | 3.577627  | 0.544771  |
| 21 | 1  | 0 | 2.579539  | 2.260056  | 0.166656  |
| 22 | 6  | 0 | 1.650741  | -0.663241 | 1.382929  |
| 23 | 1  | 0 | 2.138937  | -1.427720 | 1.987272  |
| 24 | 1  | 0 | 1.960125  | 0.316433  | 1.746277  |
| 25 | 1  | 0 | 0.573773  | -0.780653 | 1.522150  |
| 26 | 8  | 0 | 3.794286  | -2.216534 | 0.524590  |
| 27 | 1  | 0 | 4.283923  | -2.342200 | -0.297260 |

TS: 1b2-mbt OH --> 2-mbt + CH<sub>3</sub>CH<sub>2</sub>CH<sub>2</sub>CH<sub>2</sub>OH (in water)

Sum of electronic and zero-point Energies= -979.140332 (Hartree/particle)

Sum of electronic and thermal Free Energies= -979.184723 (Hartree/particle)

1 imaginary frequency (527.6030i cm<sup>-1</sup>)

Standard orientation:

| Center<br>Number | Atomic<br>Number | Atomic<br>Type | Coordinates (Angstroms) |           |           |
|------------------|------------------|----------------|-------------------------|-----------|-----------|
|                  |                  |                | X                       | Y         | Z         |
| 1                | 6                | 0              | -1.409365               | -0.253878 | -0.691783 |
| 2                | 6                | 0              | -1.693366               | 0.724488  | 0.273271  |
| 3                | 6                | 0              | -0.765986               | 1.843338  | 0.218155  |
| 4                | 6                | 0              | 0.174223                | 1.739722  | -0.736449 |
| 5                | 16               | 0              | -0.009463               | 0.219528  | -1.645118 |
| 6                | 1                | 0              | -0.828557               | 2.696298  | 0.884396  |
| 7                | 6                | 0              | 1.622408                | -0.993974 | -0.774065 |
| 8                | 1                | 0              | 1.283997                | -1.886066 | -1.281806 |
| 9                | 1                | 0              | 2.378700                | -0.412010 | -1.283090 |
| 10               | 6                | 0              | -2.135345               | -1.431799 | -0.806606 |
| 11               | 1                | 0              | -1.891712               | -2.176044 | -1.556146 |
| 12               | 6                | 0              | -3.193510               | -1.620991 | 0.076439  |
| 13               | 1                | 0              | -3.781912               | -2.528897 | 0.015136  |
| 14               | 6                | 0              | -2.764274               | 0.516668  | 1.144727  |
| 15               | 1                | 0              | -3.004000               | 1.260792  | 1.896011  |
| 16               | 6                | 0              | -3.504737               | -0.653927 | 1.038149  |
| 17               | 1                | 0              | -4.334883               | -0.824520 | 1.713826  |
| 18               | 6                | 0              | 1.265902                | 2.676644  | -1.124541 |
| 19               | 1                | 0              | 1.349459                | 3.467144  | -0.377869 |
| 20               | 1                | 0              | 2.229136                | 2.165386  | -1.198840 |
| 21               | 1                | 0              | 1.058566                | 3.133534  | -2.095462 |
| 22               | 6                | 0              | 1.453667                | -0.880016 | 0.713203  |
| 23               | 1                | 0              | 0.408229                | -0.676009 | 0.968999  |
| 24               | 1                | 0              | 1.656860                | -1.871131 | 1.126766  |

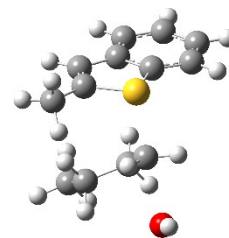

|    |   |   |          |           |           |
|----|---|---|----------|-----------|-----------|
| 25 | 6 | 0 | 2.354050 | 0.160821  | 1.372047  |
| 26 | 1 | 0 | 2.241860 | 1.125417  | 0.869377  |
| 27 | 1 | 0 | 3.398614 | -0.138239 | 1.251532  |
| 28 | 6 | 0 | 2.017469 | 0.320328  | 2.849554  |
| 29 | 1 | 0 | 2.682192 | 1.039108  | 3.333299  |
| 30 | 1 | 0 | 0.989951 | 0.674613  | 2.977592  |
| 31 | 1 | 0 | 2.110401 | -0.631455 | 3.379885  |
| 32 | 8 | 0 | 3.481583 | -2.311404 | -0.523669 |
| 33 | 1 | 0 | 3.825022 | -2.323694 | -1.424986 |

## Neutral aqueous

### Thiophenium cations +1H<sub>2</sub>O

#### 1,2,5-tmt H<sub>2</sub>O (in water)

Sum of electronic and zero-point Energies= -747.509035 (Hartree/particle)

Sum of electronic and thermal Free Energies= -747.545989 (Hartree/particle)

No imaginary frequencies

Standard orientation:

| Center Number | Atomic Number | Atomic Type | Coordinates (Angstroms) |           |           |
|---------------|---------------|-------------|-------------------------|-----------|-----------|
|               |               |             | X                       | Y         | Z         |
| 1             | 6             | 0           | -0.493806               | 1.208142  | 0.015610  |
| 2             | 6             | 0           | 0.627297                | 1.939369  | 0.083976  |
| 3             | 6             | 0           | 1.872987                | 1.188551  | -0.032127 |
| 4             | 6             | 0           | 1.720545                | -0.132626 | -0.188867 |
| 5             | 16            | 0           | -0.029786               | -0.495136 | -0.301785 |
| 6             | 1             | 0           | 0.601823                | 3.012419  | 0.232194  |
| 7             | 1             | 0           | 2.848039                | 1.657362  | 0.025100  |
| 8             | 6             | 0           | -0.326411               | -1.292151 | 1.304319  |
| 9             | 1             | 0           | 0.046069                | -2.312032 | 1.226331  |
| 10            | 1             | 0           | 0.198958                | -0.728074 | 2.071855  |
| 11            | 1             | 0           | -1.401956               | -1.291616 | 1.457584  |
| 12            | 6             | 0           | -1.925040               | 1.600295  | 0.109020  |
| 13            | 1             | 0           | -2.439037               | 1.053104  | 0.902684  |
| 14            | 1             | 0           | -1.974685               | 2.666700  | 0.332369  |
| 15            | 1             | 0           | -2.452275               | 1.413574  | -0.828565 |
| 16            | 6             | 0           | 2.702588                | -1.243141 | -0.305615 |
| 17            | 1             | 0           | 3.710040                | -0.836213 | -0.215779 |
| 18            | 1             | 0           | 2.556615                | -1.984073 | 0.485341  |
| 19            | 1             | 0           | 2.613634                | -1.753609 | -1.267007 |
| 20            | 8             | 0           | -2.803128               | -1.336102 | -0.544181 |
| 21            | 1             | 0           | -3.086729               | -0.847306 | -1.325156 |
| 22            | 1             | 0           | -3.387857               | -1.049878 | 0.167152  |

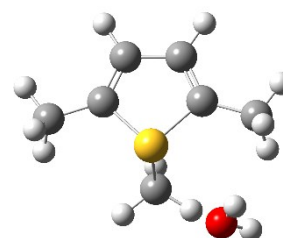

#### 1,3-dmt H<sub>2</sub>O (in water)

Sum of electronic and zero-point Energies= -708.225930 (Hartree/particle)

Sum of electronic and thermal Free Energies= -708.262331 (Hartree/particle)

No imaginary frequencies

Standard orientation:

| Center Number | Atomic Number | Atomic Type | Coordinates (Angstroms) |   |   |
|---------------|---------------|-------------|-------------------------|---|---|
|               |               |             | X                       | Y | Z |

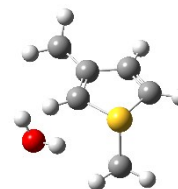

|    |    |   |           |           |           |
|----|----|---|-----------|-----------|-----------|
| 1  | 6  | 0 | 0.194176  | 0.028801  | -0.951400 |
| 2  | 6  | 0 | 0.820822  | 0.933347  | -0.183762 |
| 3  | 6  | 0 | -0.074831 | 1.565152  | 0.798777  |
| 4  | 6  | 0 | -1.337607 | 1.135729  | 0.757499  |
| 5  | 16 | 0 | -1.529246 | -0.027447 | -0.567137 |
| 6  | 1  | 0 | 0.276501  | 2.308363  | 1.504517  |
| 7  | 1  | 0 | -2.204101 | 1.408439  | 1.342590  |
| 8  | 6  | 0 | -1.698059 | -1.606771 | 0.326147  |
| 9  | 1  | 0 | -2.709295 | -1.634629 | 0.727183  |
| 10 | 1  | 0 | -1.558046 | -2.397796 | -0.407807 |
| 11 | 1  | 0 | -0.947674 | -1.638433 | 1.113091  |
| 12 | 6  | 0 | 2.269061  | 1.276487  | -0.264751 |
| 13 | 1  | 0 | 2.388617  | 2.340494  | -0.483119 |
| 14 | 1  | 0 | 2.748262  | 1.087400  | 0.699198  |
| 15 | 1  | 0 | 2.772977  | 0.696378  | -1.037100 |
| 16 | 1  | 0 | 0.568190  | -0.584393 | -1.759644 |
| 17 | 8  | 0 | 2.270167  | -2.194485 | 0.506679  |
| 18 | 1  | 0 | 2.595122  | -1.602269 | -0.181314 |
| 19 | 1  | 0 | 1.334682  | -1.985002 | 0.608101  |

2e1-mt H<sub>2</sub>O (in water)

Sum of electronic and zero-point Energies= -747.501120 (Hartree/particle)

Sum of electronic and thermal Free Energies= -747.539068 (Hartree/particle)

No imaginary frequencies

Standard orientation:

| Center Number | Atomic Number | Atomic Type | Coordinates (Angstroms) |           |           |
|---------------|---------------|-------------|-------------------------|-----------|-----------|
|               |               |             | X                       | Y         | Z         |
| 1             | 6             | 0           | 0.622053                | 0.087006  | -0.143017 |
| 2             | 6             | 0           | 0.360761                | -0.562178 | -1.285565 |
| 3             | 6             | 0           | -1.059709               | -0.710222 | -1.594863 |
| 4             | 6             | 0           | -1.881633               | -0.166360 | -0.691526 |
| 5             | 16            | 0           | -0.936658               | 0.512906  | 0.643292  |
| 6             | 1             | 0           | 1.139344                | -0.941392 | -1.935876 |
| 7             | 1             | 0           | -1.415159               | -1.212345 | -2.485935 |
| 8             | 1             | 0           | -2.960091               | -0.119127 | -0.649715 |
| 9             | 6             | 0           | 1.894706                | 0.452690  | 0.543509  |
| 10            | 1             | 0           | 1.879827                | 1.522545  | 0.779895  |
| 11            | 1             | 0           | 1.939404                | -0.074637 | 1.502474  |
| 12            | 6             | 0           | 3.115781                | 0.118433  | -0.304136 |
| 13            | 1             | 0           | 4.022724                | 0.410694  | 0.226166  |
| 14            | 1             | 0           | 3.173260                | -0.952559 | -0.508392 |
| 15            | 1             | 0           | 3.091077                | 0.650510  | -1.257192 |
| 16            | 6             | 0           | -1.012875               | 2.297503  | 0.288183  |
| 17            | 1             | 0           | -2.020251               | 2.626007  | 0.535671  |
| 18            | 1             | 0           | -0.288611               | 2.778876  | 0.943490  |
| 19            | 1             | 0           | -0.782091               | 2.458504  | -0.762400 |
| 20            | 8             | 0           | -0.569015               | -2.414679 | 1.334843  |
| 21            | 1             | 0           | -0.867624               | -2.767874 | 0.488937  |
| 22            | 1             | 0           | 0.392332                | -2.369502 | 1.275955  |

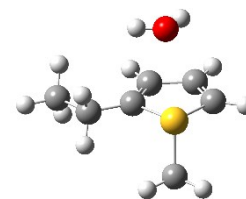

1-mbt H<sub>2</sub>O (in water)

Sum of electronic and zero-point Energies= -822.528757 (Hartree/particle)

Sum of electronic and thermal Free Energies= -822.566209 (Hartree/particle)

No imaginary frequencies

Standard orientation:

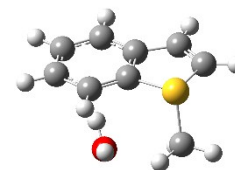

| Center Number | Atomic Number | Atomic Type | Coordinates (Angstroms) |           |           |
|---------------|---------------|-------------|-------------------------|-----------|-----------|
|               |               |             | X                       | Y         | Z         |
| 1             | 6             | 0           | -0.375658               | -1.095571 | 0.244378  |
| 2             | 6             | 0           | -0.016588               | -0.077344 | -0.643684 |
| 3             | 6             | 0           | -0.927614               | 0.707818  | -1.325025 |
| 4             | 6             | 0           | -2.277552               | 0.456683  | -1.079253 |
| 5             | 6             | 0           | -2.668461               | -0.553234 | -0.198947 |
| 6             | 6             | 0           | -1.728450               | -1.337448 | 0.466011  |
| 7             | 6             | 0           | 0.782712                | -1.761391 | 0.838092  |
| 8             | 6             | 0           | 1.961639                | -1.278127 | 0.441178  |
| 9             | 1             | 0           | -0.614562               | 1.483125  | -2.014308 |
| 10            | 1             | 0           | -3.028183               | 1.052336  | -1.584378 |
| 11            | 1             | 0           | -3.723798               | -0.731701 | -0.029804 |
| 12            | 1             | 0           | -2.037498               | -2.123313 | 1.145202  |
| 13            | 1             | 0           | 0.689388                | -2.573456 | 1.549091  |
| 14            | 1             | 0           | 2.967631                | -1.572593 | 0.704365  |
| 15            | 16            | 0           | 1.757364                | 0.014429  | -0.769365 |
| 16            | 6             | 0           | 2.143981                | 1.514829  | 0.184604  |
| 17            | 1             | 0           | 1.606636                | 1.471859  | 1.129366  |
| 18            | 1             | 0           | 1.839161                | 2.362242  | -0.427600 |
| 19            | 1             | 0           | 3.222802                | 1.520070  | 0.331780  |
| 20            | 8             | 0           | -1.028919               | 2.000424  | 1.894729  |
| 21            | 1             | 0           | -0.648501               | 2.233930  | 1.040108  |
| 22            | 1             | 0           | -1.523598               | 1.185955  | 1.744054  |

1,2-dmbt H<sub>2</sub>O (in water)

Sum of electronic and zero-point Energies= -861.812090 (Hartree/particle)

Sum of electronic and thermal Free Energies= -861.852998 (Hartree/particle)

No imaginary frequencies

Standard orientation:

| Center Number | Atomic Number | Atomic Type | Coordinates (Angstroms) |           |           |
|---------------|---------------|-------------|-------------------------|-----------|-----------|
|               |               |             | X                       | Y         | Z         |
| 1             | 6             | 0           | 0.507260                | 1.035859  | -0.046184 |
| 2             | 6             | 0           | 0.409621                | -0.208352 | -0.677711 |
| 3             | 6             | 0           | 1.497882                | -0.943411 | -1.107616 |
| 4             | 6             | 0           | 2.758562                | -0.398020 | -0.864485 |
| 5             | 6             | 0           | 2.890224                | 0.840870  | -0.234938 |
| 6             | 6             | 0           | 1.774618                | 1.567532  | 0.175392  |
| 7             | 6             | 0           | -0.793054               | 1.589000  | 0.325151  |
| 8             | 6             | 0           | -1.850972               | 0.837330  | 0.003685  |
| 9             | 1             | 0           | 1.384308                | -1.900145 | -1.603512 |
| 10            | 1             | 0           | 3.641633                | -0.944172 | -1.173479 |
| 11            | 1             | 0           | 3.880498                | 1.246904  | -0.064524 |
| 12            | 1             | 0           | 1.884281                | 2.530281  | 0.660923  |
| 13            | 1             | 0           | -0.898359               | 2.537849  | 0.838890  |
| 14            | 16            | 0           | -1.303299               | -0.635034 | -0.885596 |
| 15            | 6             | 0           | -1.570973               | -1.950949 | 0.339439  |
| 16            | 1             | 0           | -2.641106               | -2.152991 | 0.351685  |
| 17            | 1             | 0           | -1.209429               | -1.611806 | 1.307271  |
| 18            | 1             | 0           | -1.026697               | -2.824637 | -0.016485 |
| 19            | 6             | 0           | -3.307970               | 1.018001  | 0.232920  |
| 20            | 1             | 0           | -3.712485               | 0.208850  | 0.846963  |
| 21            | 1             | 0           | -3.466249               | 1.961934  | 0.754661  |
| 22            | 1             | 0           | -3.860353               | 1.039350  | -0.708788 |
| 23            | 8             | 0           | 1.299786                | -1.108908 | 2.492037  |
| 24            | 1             | 0           | 1.998696                | -0.901440 | 1.860238  |
| 25            | 1             | 0           | 0.588560                | -0.485337 | 2.305475  |

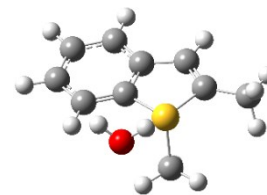

1e2-mbt H<sub>2</sub>O (in water)

Sum of electronic and zero-point Energies= -901.086731 (Hartree/particle)  
 Sum of electronic and thermal Free Energies= -901.129539 (Hartree/particle)  
 No imaginary frequencies

Standard orientation:

| Center Number | Atomic Number | Atomic Type | Coordinates (Angstroms) |           |           |
|---------------|---------------|-------------|-------------------------|-----------|-----------|
|               |               |             | X                       | Y         | Z         |
| 1             | 6             | 0           | -1.710803               | 0.487864  | 0.286527  |
| 2             | 6             | 0           | -0.945319               | -0.355748 | -0.525340 |
| 3             | 6             | 0           | -1.310465               | -1.647879 | -0.852229 |
| 4             | 6             | 0           | -2.510372               | -2.116546 | -0.317556 |
| 5             | 6             | 0           | -3.298225               | -1.297827 | 0.492265  |
| 6             | 6             | 0           | -2.911494               | 0.004621  | 0.798374  |
| 7             | 6             | 0           | -1.088692               | 1.793698  | 0.492674  |
| 8             | 6             | 0           | 0.091060                | 1.968155  | -0.112192 |
| 9             | 1             | 0           | -0.696427               | -2.273500 | -1.489595 |
| 10            | 1             | 0           | -2.832257               | -3.126392 | -0.541205 |
| 11            | 1             | 0           | -4.229996               | -1.682683 | 0.889983  |
| 12            | 1             | 0           | -3.528985               | 0.636081  | 1.426715  |
| 13            | 1             | 0           | -1.540413               | 2.565315  | 1.105889  |
| 14            | 16            | 0           | 0.505494                | 0.505788  | -1.078946 |
| 15            | 6             | 0           | 1.875252                | -0.261332 | -0.105367 |
| 16            | 1             | 0           | 2.746294                | 0.337036  | -0.377911 |
| 17            | 1             | 0           | 1.978189                | -1.247738 | -0.561328 |
| 18            | 6             | 0           | 1.059469                | 3.094917  | -0.102490 |
| 19            | 1             | 0           | 1.216736                | 3.495753  | -1.106194 |
| 20            | 1             | 0           | 0.672412                | 3.888145  | 0.537232  |
| 21            | 1             | 0           | 2.028847                | 2.773145  | 0.289991  |
| 22            | 6             | 0           | 1.616098                | -0.308973 | 1.381366  |
| 23            | 1             | 0           | 2.468858                | -0.804935 | 1.849926  |
| 24            | 1             | 0           | 1.530666                | 0.689452  | 1.811765  |
| 25            | 1             | 0           | 0.720291                | -0.884250 | 1.620657  |
| 26            | 8             | 0           | 4.624667                | -1.964994 | 0.256174  |
| 27            | 1             | 0           | 3.834992                | -2.341727 | 0.659934  |
| 28            | 1             | 0           | 5.346490                | -2.562063 | 0.481687  |

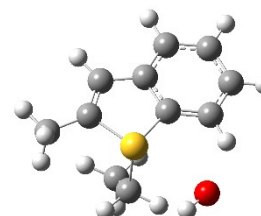

1b2-mbt H<sub>2</sub>O (in water)

Sum of electronic and zero-point Energies= -979.637107 (Hartree/particle)  
 Sum of electronic and thermal Free Energies= -979.681976 (Hartree/particle)  
 No imaginary frequencies

Standard orientation:

| Center Number | Atomic Number | Atomic Type | Coordinates (Angstroms) |           |           |
|---------------|---------------|-------------|-------------------------|-----------|-----------|
|               |               |             | X                       | Y         | Z         |
| 1             | 6             | 0           | -1.497510               | 0.611061  | 0.754518  |
| 2             | 6             | 0           | -1.220305               | 0.341162  | -0.589902 |
| 3             | 6             | 0           | -1.911449               | -0.586906 | -1.346716 |
| 4             | 6             | 0           | -2.924811               | -1.296000 | -0.701976 |
| 5             | 6             | 0           | -3.218960               | -1.056504 | 0.640866  |
| 6             | 6             | 0           | -2.514451               | -0.106647 | 1.377998  |
| 7             | 6             | 0           | -0.636850               | 1.652181  | 1.312409  |
| 8             | 6             | 0           | 0.255134                | 2.174577  | 0.464277  |
| 9             | 1             | 0           | -1.679333               | -0.761433 | -2.391085 |
| 10            | 1             | 0           | -3.485727               | -2.040016 | -1.254545 |

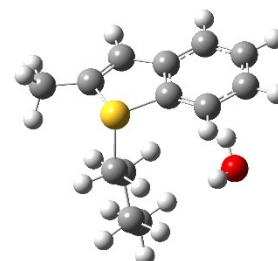

|    |    |   |           |           |           |
|----|----|---|-----------|-----------|-----------|
| 11 | 1  | 0 | -4.013270 | -1.617598 | 1.119084  |
| 12 | 1  | 0 | -2.752867 | 0.080226  | 2.418692  |
| 13 | 1  | 0 | -0.711055 | 1.981056  | 2.342829  |
| 14 | 16 | 0 | 0.064653  | 1.426036  | -1.163418 |
| 15 | 6  | 0 | 1.536608  | 0.314250  | -1.290316 |
| 16 | 1  | 0 | 2.313812  | 0.953073  | -1.713189 |
| 17 | 1  | 0 | 1.228543  | -0.408964 | -2.049987 |
| 18 | 6  | 0 | 1.304211  | 3.212405  | 0.636478  |
| 19 | 1  | 0 | 1.111946  | 4.078042  | -0.001282 |
| 20 | 1  | 0 | 1.313532  | 3.536934  | 1.677155  |
| 21 | 1  | 0 | 2.293511  | 2.818865  | 0.384905  |
| 22 | 6  | 0 | 1.938361  | -0.330612 | 0.019722  |
| 23 | 1  | 0 | 2.374676  | 0.417591  | 0.686549  |
| 24 | 1  | 0 | 1.063362  | -0.748637 | 0.525931  |
| 25 | 8  | 0 | -0.147359 | -3.043505 | 0.203138  |
| 26 | 1  | 0 | 0.144231  | -2.585833 | -0.594864 |
| 27 | 6  | 0 | 2.951494  | -1.446166 | -0.239987 |
| 28 | 1  | 0 | 3.819426  | -1.035187 | -0.765081 |
| 29 | 1  | 0 | 2.503801  | -2.192071 | -0.904940 |
| 30 | 6  | 0 | 3.391737  | -2.106254 | 1.061120  |
| 31 | 1  | 0 | 2.537717  | -2.546309 | 1.583088  |
| 32 | 1  | 0 | 4.116812  | -2.901531 | 0.875768  |
| 33 | 1  | 0 | 3.855515  | -1.379302 | 1.733003  |
| 34 | 1  | 0 | -0.609462 | -2.376733 | 0.726615  |

### TS neutral hydrolysis (1 H<sub>2</sub>O)

TS: 1,2,5-tmt H<sub>2</sub>O --> 2,5-dmt + CH<sub>3</sub>OH<sub>2</sub> (in water)

Sum of electronic and zero-point Energies= -747.475846 (Hartree/particle)

Sum of electronic and thermal Free Energies= -747.512923 (Hartree/particle)

1 imaginary frequency (592.4629i cm<sup>-1</sup>)

Standard orientation:

| Center Number | Atomic Number | Atomic Type | Coordinates (Angstroms) |           |           |
|---------------|---------------|-------------|-------------------------|-----------|-----------|
|               |               |             | X                       | Y         | Z         |
| 1             | 6             | 0           | 0.951773                | 1.284049  | 0.034203  |
| 2             | 6             | 0           | 1.595196                | 0.739955  | 1.089721  |
| 3             | 6             | 0           | 1.609642                | -0.705431 | 1.093960  |
| 4             | 6             | 0           | 0.977330                | -1.268082 | 0.041618  |
| 5             | 16            | 0           | 0.351672                | -0.001338 | -1.012136 |
| 6             | 1             | 0           | 2.051009                | 1.344083  | 1.865219  |
| 7             | 1             | 0           | 2.075799                | -1.295655 | 1.873974  |
| 8             | 6             | 0           | -1.800540               | -0.029300 | -0.164756 |
| 9             | 1             | 0           | -2.027950               | -0.943752 | -0.691819 |
| 10            | 1             | 0           | -1.394309               | -0.067211 | 0.836547  |
| 11            | 1             | 0           | -2.025113               | 0.920703  | -0.626924 |
| 12            | 6             | 0           | 0.695382                | 2.712471  | -0.308826 |
| 13            | 1             | 0           | -0.376454               | 2.926017  | -0.344033 |
| 14            | 1             | 0           | 1.146738                | 3.351827  | 0.450634  |
| 15            | 1             | 0           | 1.120883                | 2.974946  | -1.279789 |
| 16            | 6             | 0           | 0.740769                | -2.702581 | -0.289255 |
| 17            | 1             | 0           | 1.205373                | -3.329215 | 0.472796  |
| 18            | 1             | 0           | -0.328358               | -2.930875 | -0.316265 |
| 19            | 1             | 0           | 1.164386                | -2.966624 | -1.260585 |
| 20            | 8             | 0           | -3.613086               | -0.104950 | 0.628173  |
| 21            | 1             | 0           | -4.257976               | 0.082377  | -0.067174 |
| 22            | 1             | 0           | -3.693402               | 0.607901  | 1.276228  |

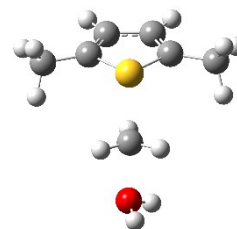



TS: 1,3-dmt H<sub>2</sub>O --> 3-mt + CH<sub>3</sub>OH<sub>2</sub> (in water)

Sum of electronic and zero-point Energies= -708.194587 (Hartree/particle)

Sum of electronic and thermal Free Energies= -708.230039 (Hartree/particle)

1 imaginary frequency (593.6835i cm<sup>-1</sup>)

Standard orientation:

| Center Number | Atomic Number | Atomic Type | Coordinates (Angstroms) |           |           |
|---------------|---------------|-------------|-------------------------|-----------|-----------|
|               |               |             | X                       | Y         | Z         |
| 1             | 6             | 0           | -0.929094               | 0.121594  | -1.048976 |
| 2             | 6             | 0           | -1.718983               | 0.477380  | -0.010959 |
| 3             | 6             | 0           | -1.464808               | -0.333655 | 1.168201  |
| 4             | 6             | 0           | -0.509885               | -1.266491 | 0.989871  |
| 5             | 16            | 0           | 0.117182                | -1.213959 | -0.639052 |
| 6             | 1             | 0           | -1.990931               | -0.191817 | 2.104640  |
| 7             | 1             | 0           | -0.116881               | -1.989729 | 1.690158  |
| 8             | 6             | 0           | 2.008294                | 0.015025  | -0.145265 |
| 9             | 1             | 0           | 2.493784                | -0.829663 | 0.320180  |
| 10            | 1             | 0           | 2.193897                | 0.219562  | -1.188471 |
| 11            | 1             | 0           | 1.402476                | 0.687209  | 0.445265  |
| 12            | 6             | 0           | -2.741646               | 1.568723  | -0.040991 |
| 13            | 1             | 0           | -3.740734               | 1.157312  | 0.122646  |
| 14            | 1             | 0           | -2.552518               | 2.292403  | 0.755124  |
| 15            | 1             | 0           | -2.734129               | 2.091091  | -0.997360 |
| 16            | 1             | 0           | -0.889940               | 0.537826  | -2.045832 |
| 17            | 8             | 0           | 3.626674                | 1.106765  | 0.280700  |
| 18            | 1             | 0           | 3.420279                | 2.026274  | 0.064524  |
| 19            | 1             | 0           | 3.763123                | 1.073294  | 1.237071  |

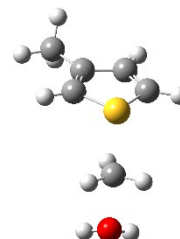

TS: 2e1-mt H<sub>2</sub>O --> 2-et + CH<sub>3</sub>OH<sub>2</sub> (in water)

Sum of electronic and zero-point Energies= -747.468647 (Hartree/particle)

Sum of electronic and thermal Free Energies= -747.505999 (Hartree/particle)

1 imaginary frequency (591.3143i cm<sup>-1</sup>)

Standard orientation:

| Center Number | Atomic Number | Atomic Type | Coordinates (Angstroms) |           |           |
|---------------|---------------|-------------|-------------------------|-----------|-----------|
|               |               |             | X                       | Y         | Z         |
| 1             | 6             | 0           | -1.056661               | -0.039364 | -0.155746 |
| 2             | 6             | 0           | -1.409895               | 0.702945  | 0.917536  |
| 3             | 6             | 0           | -0.694379               | 1.955011  | 1.027159  |
| 4             | 6             | 0           | 0.199211                | 2.149145  | 0.036320  |
| 5             | 16            | 0           | 0.183592                | 0.807190  | -1.080375 |
| 6             | 1             | 0           | -2.155598               | 0.381626  | 1.634185  |
| 7             | 1             | 0           | -0.855379               | 2.667179  | 1.826368  |
| 8             | 6             | 0           | 1.954430                | -0.354011 | -0.168321 |
| 9             | 1             | 0           | 2.670776                | 0.349880  | -0.563632 |
| 10            | 1             | 0           | 1.539292                | -0.205744 | 0.818755  |
| 11            | 1             | 0           | 1.709415                | -1.238775 | -0.737359 |
| 12            | 6             | 0           | -1.526744               | -1.386541 | -0.609309 |
| 13            | 1             | 0           | -0.663142               | -2.055856 | -0.693476 |
| 14            | 1             | 0           | -1.943716               | -1.299264 | -1.617269 |
| 15            | 8             | 0           | 3.473655                | -1.316609 | 0.695799  |
| 16            | 1             | 0           | 4.032794                | -1.685314 | -0.001180 |
| 17            | 1             | 0           | 3.111348                | -2.068923 | 1.182910  |
| 18            | 1             | 0           | 0.867097                | 2.980768  | -0.136598 |
| 19            | 6             | 0           | -2.560328               | -1.988416 | 0.334618  |
| 20            | 1             | 0           | -3.448871               | -1.357082 | 0.402854  |

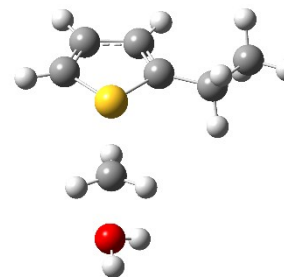

|    |   |   |           |           |           |
|----|---|---|-----------|-----------|-----------|
| 21 | 1 | 0 | -2.871857 | -2.968428 | -0.029335 |
| 22 | 1 | 0 | -2.152666 | -2.114862 | 1.339845  |

TS: 1-mbt H<sub>2</sub>O --> bt + CH<sub>3</sub>OH<sub>2</sub> (in water)

Sum of electronic and zero-point Energies= -822.494907 (Hartree/particle)

Sum of electronic and thermal Free Energies= -822.531958 (Hartree/particle)

1 imaginary frequency (600.0346i cm<sup>-1</sup>)

Standard orientation:

| Center Number | Atomic Number | Atomic Type | Coordinates (Angstroms) |           |           |
|---------------|---------------|-------------|-------------------------|-----------|-----------|
|               |               |             | X                       | Y         | Z         |
| 1             | 6             | 0           | -0.605569               | 0.016452  | -0.579702 |
| 2             | 6             | 0           | -1.202707               | 0.700640  | 0.490130  |
| 3             | 6             | 0           | -0.484323               | 1.915236  | 0.833563  |
| 4             | 6             | 0           | 0.599552                | 2.128791  | 0.069570  |
| 5             | 16            | 0           | 0.829113                | 0.872267  | -1.141223 |
| 6             | 1             | 0           | -0.792111               | 2.582115  | 1.629282  |
| 7             | 6             | 0           | 2.332798                | -0.459678 | 0.009686  |
| 8             | 1             | 0           | 3.160601                | 0.183665  | -0.246473 |
| 9             | 1             | 0           | 1.772937                | -0.291539 | 0.918836  |
| 10            | 6             | 0           | -1.101507               | -1.184936 | -1.072554 |
| 11            | 1             | 0           | -0.623666               | -1.698546 | -1.899036 |
| 12            | 6             | 0           | -2.240105               | -1.704193 | -0.468048 |
| 13            | 1             | 0           | -2.654128               | -2.638783 | -0.828074 |
| 14            | 6             | 0           | -2.350260               | 0.161462  | 1.079251  |
| 15            | 1             | 0           | -2.829293               | 0.677083  | 1.904082  |
| 16            | 6             | 0           | -2.858319               | -1.035630 | 0.595945  |
| 17            | 1             | 0           | -3.746556               | -1.461073 | 1.048198  |
| 18            | 1             | 0           | 4.247467                | -1.936706 | 0.452504  |
| 19            | 8             | 0           | 3.538286                | -1.642099 | 1.040026  |
| 20            | 1             | 0           | 2.093554                | -1.301688 | -0.623316 |
| 21            | 1             | 0           | 1.305549                | 2.946217  | 0.106399  |
| 22            | 1             | 0           | 3.956195                | -1.109088 | 1.729907  |

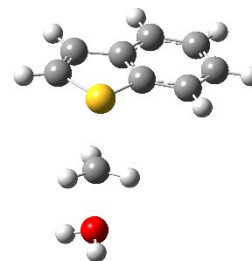

TS: 1,2-dmbt H<sub>2</sub>O --> 2-mbt + CH<sub>3</sub>OH<sub>2</sub> (in water)

Sum of electronic and zero-point Energies= -861.775740 (Hartree/particle)

Sum of electronic and thermal Free Energies= -861.814679 (Hartree/particle)

1 imaginary frequency (604.2843i cm<sup>-1</sup>)

Standard orientation:

| Center Number | Atomic Number | Atomic Type | Coordinates (Angstroms) |           |           |
|---------------|---------------|-------------|-------------------------|-----------|-----------|
|               |               |             | X                       | Y         | Z         |
| 1             | 6             | 0           | -0.827401               | 0.094003  | 0.580904  |
| 2             | 6             | 0           | -1.194369               | -0.754048 | -0.475219 |
| 3             | 6             | 0           | -0.168676               | -1.736707 | -0.774668 |
| 4             | 6             | 0           | 0.925714                | -1.650929 | 0.002448  |
| 5             | 16            | 0           | 0.768128                | -0.335937 | 1.188861  |
| 6             | 1             | 0           | -0.267866               | -2.474029 | -1.562935 |
| 7             | 6             | 0           | 1.964566                | 1.250171  | -0.011024 |
| 8             | 1             | 0           | 2.903530                | 0.855168  | 0.347143  |
| 9             | 1             | 0           | 1.525898                | 0.875170  | -0.925060 |
| 10            | 6             | 0           | -1.641991               | 1.124162  | 1.034153  |
| 11            | 1             | 0           | -1.338529               | 1.765643  | 1.853419  |
| 12            | 6             | 0           | -2.867253               | 1.301757  | 0.401118  |

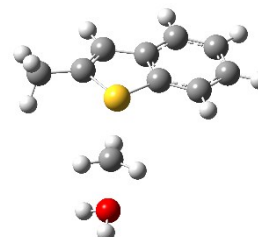

|    |   |   |           |           |           |
|----|---|---|-----------|-----------|-----------|
| 13 | 1 | 0 | -3.526254 | 2.096363  | 0.730669  |
| 14 | 6 | 0 | -2.433054 | -0.559985 | -1.093469 |
| 15 | 1 | 0 | -2.737161 | -1.204344 | -1.910823 |
| 16 | 6 | 0 | -3.257543 | 0.465520  | -0.651061 |
| 17 | 1 | 0 | -4.219029 | 0.621648  | -1.126726 |
| 18 | 6 | 0 | 2.188112  | -2.441630 | -0.027661 |
| 19 | 1 | 0 | 2.374412  | -2.930801 | 0.931043  |
| 20 | 1 | 0 | 2.118263  | -3.205790 | -0.802217 |
| 21 | 1 | 0 | 3.046474  | -1.801199 | -0.249582 |
| 22 | 1 | 0 | 3.477568  | 3.114437  | -0.474829 |
| 23 | 8 | 0 | 2.906730  | 2.613088  | -1.072988 |
| 24 | 1 | 0 | 3.492157  | 2.157560  | -1.693237 |
| 25 | 1 | 0 | 1.478029  | 2.046582  | 0.532137  |

TS: 1e2-mbt H<sub>2</sub>O --> 2-mbt + CH<sub>3</sub>CH<sub>2</sub>OH<sub>2</sub> (in water)

Sum of electronic and zero-point Energies= -901.054486 (Hartree/particle)

Sum of electronic and thermal Free Energies= -901.095838 (Hartree/particle)

1 imaginary frequency (552.3564i cm<sup>-1</sup>)

Standard orientation:

| Center<br>Number | Atomic<br>Number | Atomic<br>Type | Coordinates (Angstroms) |           |           |
|------------------|------------------|----------------|-------------------------|-----------|-----------|
|                  |                  |                | X                       | Y         | Z         |
| 1                | 6                | 0              | -1.001393               | -0.074183 | -0.561183 |
| 2                | 6                | 0              | -1.403163               | 0.761972  | 0.493777  |
| 3                | 6                | 0              | -0.479252               | 1.858640  | 0.709518  |
| 4                | 6                | 0              | 0.573429                | 1.866779  | -0.129230 |
| 5                | 16               | 0              | 0.507992                | 0.498581  | -1.258385 |
| 6                | 1                | 0              | -0.617835               | 2.608778  | 1.479478  |
| 7                | 6                | 0              | 1.973000                | -0.883794 | 0.117569  |
| 8                | 1                | 0              | 2.770304                | -0.195552 | -0.124735 |
| 9                | 1                | 0              | 1.306025                | -0.625298 | 0.929379  |
| 10               | 6                | 0              | -1.734583               | -1.190397 | -0.950139 |
| 11               | 1                | 0              | -1.415395               | -1.815981 | -1.775712 |
| 12               | 6                | 0              | -2.901910               | -1.472348 | -0.249581 |
| 13               | 1                | 0              | -3.494367               | -2.335745 | -0.529146 |
| 14               | 6                | 0              | -2.583449               | 0.461430  | 1.180244  |
| 15               | 1                | 0              | -2.911745               | 1.096372  | 1.995746  |
| 16               | 6                | 0              | -3.320970               | -0.652881 | 0.805115  |
| 17               | 1                | 0              | -4.236314               | -0.892203 | 1.334045  |
| 18               | 6                | 0              | 1.731973                | 2.801607  | -0.196288 |
| 19               | 1                | 0              | 1.818851                | 3.260749  | -1.183452 |
| 20               | 1                | 0              | 1.605215                | 3.590138  | 0.545931  |
| 21               | 1                | 0              | 2.670656                | 2.279546  | 0.010917  |
| 22               | 6                | 0              | 1.809767                | -2.156710 | -0.637826 |
| 23               | 1                | 0              | 0.766816                | -2.473593 | -0.660242 |
| 24               | 1                | 0              | 2.201631                | -2.068236 | -1.649944 |
| 25               | 1                | 0              | 2.371100                | -2.945594 | -0.131513 |
| 26               | 1                | 0              | 4.012532                | -1.920468 | 1.230219  |
| 27               | 8                | 0              | 3.198548                | -1.580177 | 1.625852  |
| 28               | 1                | 0              | 3.455576                | -0.819493 | 2.164508  |

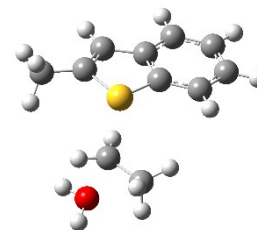

TS: 1b2-mbt H<sub>2</sub>O --> 2-mbt + CH<sub>3</sub>CH<sub>2</sub>CH<sub>2</sub>CH<sub>2</sub>OH<sub>2</sub> (in water)

Sum of electronic and zero-point Energies= -979.604348 (Hartree/particle)

Sum of electronic and thermal Free Energies= -979.648436 (Hartree/particle)

1 imaginary frequency (505.8787i cm<sup>-1</sup>)

Standard orientation:

| Center Number | Atomic Number | Atomic Type | Coordinates (Angstroms) |           |           |
|---------------|---------------|-------------|-------------------------|-----------|-----------|
|               |               |             | X                       | Y         | Z         |
| 1             | 6             | 0           | -1.461714               | -0.255936 | -0.710195 |
| 2             | 6             | 0           | -1.693699               | 0.692339  | 0.300299  |
| 3             | 6             | 0           | -0.777821               | 1.814726  | 0.222232  |
| 4             | 6             | 0           | 0.102837                | 1.737530  | -0.793893 |
| 5             | 16            | 0           | -0.123608               | 0.246793  | -1.727341 |
| 6             | 1             | 0           | -0.801129               | 2.649567  | 0.913335  |
| 7             | 6             | 0           | 1.706056                | -1.067338 | -0.699790 |
| 8             | 1             | 0           | 1.266130                | -1.924628 | -1.191418 |
| 9             | 1             | 0           | 2.363747                | -0.436155 | -1.282947 |
| 10            | 6             | 0           | -2.195402               | -1.433889 | -0.811996 |
| 11            | 1             | 0           | -1.995994               | -2.156544 | -1.595180 |
| 12            | 6             | 0           | -3.199602               | -1.651157 | 0.123232  |
| 13            | 1             | 0           | -3.790280               | -2.558211 | 0.069023  |
| 14            | 6             | 0           | -2.712174               | 0.453362  | 1.229062  |
| 15            | 1             | 0           | -2.907818               | 1.174937  | 2.014580  |
| 16            | 6             | 0           | -3.455941               | -0.713509 | 1.132227  |
| 17            | 1             | 0           | -4.246180               | -0.905884 | 1.848809  |
| 18            | 6             | 0           | 1.164789                | 2.697909  | -1.210744 |
| 19            | 1             | 0           | 1.272377                | 3.473983  | -0.452002 |
| 20            | 1             | 0           | 2.130597                | 2.202607  | -1.339199 |
| 21            | 1             | 0           | 0.907821                | 3.173447  | -2.160565 |
| 22            | 6             | 0           | 1.482264                | -0.832447 | 0.747543  |
| 23            | 1             | 0           | 0.422953                | -0.602401 | 0.916212  |
| 24            | 1             | 0           | 1.621534                | -1.795900 | 1.248964  |
| 25            | 6             | 0           | 2.364828                | 0.248385  | 1.363178  |
| 26            | 1             | 0           | 2.317961                | 1.153732  | 0.751569  |
| 27            | 1             | 0           | 3.407300                | -0.084117 | 1.354784  |
| 28            | 6             | 0           | 1.928392                | 0.565518  | 2.787799  |
| 29            | 1             | 0           | 2.574631                | 1.319290  | 3.241662  |
| 30            | 1             | 0           | 0.902654                | 0.946450  | 2.802750  |
| 31            | 1             | 0           | 1.961143                | -0.327865 | 3.417531  |
| 32            | 8             | 0           | 3.405021                | -2.304677 | -0.447050 |
| 33            | 1             | 0           | 3.685189                | -2.570923 | -1.332499 |
| 34            | 1             | 0           | 4.128038                | -1.775626 | -0.085294 |

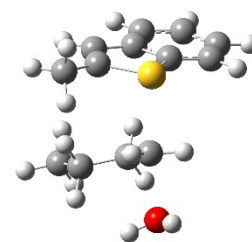

## Thiophenium cations + 4 H<sub>2</sub>O

1,2,5-tmt 4 H<sub>2</sub>O (in water)

Sum of electronic and zero-point Energies= -976.730733 (Hartree/particle)

Sum of electronic and thermal Free Energies= -976.779411 (Hartree/particle)

No imaginary frequencies

Standard orientation:

| Center Number | Atomic Number | Atomic Type | Coordinates (Angstroms) |           |           |
|---------------|---------------|-------------|-------------------------|-----------|-----------|
|               |               |             | X                       | Y         | Z         |
| 1             | 6             | 0           | 2.145400                | 0.838251  | 0.135016  |
| 2             | 6             | 0           | 3.113366                | -0.082273 | 0.235508  |
| 3             | 6             | 0           | 2.677752                | -1.461994 | 0.062351  |
| 4             | 6             | 0           | 1.367760                | -1.620027 | -0.168251 |
| 5             | 16            | 0           | 0.613040                | 0.003622  | -0.294796 |
| 6             | 1             | 0           | 4.139972                | 0.185270  | 0.456277  |
| 7             | 1             | 0           | 3.355206                | -2.304585 | 0.134206  |

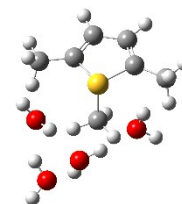

|    |   |   |           |           |           |
|----|---|---|-----------|-----------|-----------|
| 8  | 6 | 0 | -0.319800 | 0.108069  | 1.259515  |
| 9  | 1 | 0 | -1.104872 | -0.640042 | 1.189252  |
| 10 | 1 | 0 | 0.362275  | -0.092042 | 2.083310  |
| 11 | 1 | 0 | -0.736950 | 1.111868  | 1.306437  |
| 12 | 6 | 0 | 2.194815  | 2.314859  | 0.306034  |
| 13 | 1 | 0 | 1.496619  | 2.649053  | 1.077567  |
| 14 | 1 | 0 | 3.205554  | 2.589795  | 0.610307  |
| 15 | 1 | 0 | 1.953045  | 2.838077  | -0.620486 |
| 16 | 6 | 0 | 0.562323  | -2.854511 | -0.364965 |
| 17 | 1 | 0 | 1.213495  | -3.715633 | -0.209269 |
| 18 | 1 | 0 | -0.266068 | -2.909456 | 0.344087  |
| 19 | 1 | 0 | 0.148127  | -2.905551 | -1.373604 |
| 20 | 8 | 0 | -2.114734 | -1.395336 | -0.893563 |
| 21 | 1 | 0 | -1.969598 | -1.905410 | -1.697258 |
| 22 | 1 | 0 | -2.394037 | -0.497910 | -1.154454 |
| 23 | 8 | 0 | -3.000203 | 1.185686  | -0.702770 |
| 24 | 1 | 0 | -3.239019 | 0.849553  | 0.177423  |
| 25 | 1 | 0 | -2.217312 | 1.757056  | -0.601255 |
| 26 | 8 | 0 | -3.608462 | -0.606154 | 1.370086  |
| 27 | 1 | 0 | -4.538753 | -0.827012 | 1.487494  |
| 28 | 1 | 0 | -3.256367 | -1.225318 | 0.710708  |
| 29 | 8 | 0 | -0.729400 | 2.712443  | -0.606853 |
| 30 | 1 | 0 | -0.509664 | 3.354935  | 0.076796  |
| 31 | 1 | 0 | -0.277589 | 3.002039  | -1.407259 |

1,3-dmt 4 H<sub>2</sub>O (in water)

Sum of electronic and zero-point Energies= -937.449924 (Hartree/particle)

Sum of electronic and thermal Free Energies= -937.495723 (Hartree/particle)

No imaginary frequencies

Standard orientation:

| Center<br>Number | Atomic<br>Number | Atomic<br>Type | Coordinates (Angstroms) |           |           |
|------------------|------------------|----------------|-------------------------|-----------|-----------|
|                  |                  |                | X                       | Y         | Z         |
| 1                | 6                | 0              | 1.855150                | 0.804703  | 0.059938  |
| 2                | 6                | 0              | 2.866511                | -0.077592 | 0.058416  |
| 3                | 6                | 0              | 2.410416                | -1.462328 | -0.138840 |
| 4                | 6                | 0              | 1.088893                | -1.591707 | -0.280243 |
| 5                | 16               | 0              | 0.317305                | 0.002969  | -0.278310 |
| 6                | 1                | 0              | 3.097704                | -2.299997 | -0.156542 |
| 7                | 6                | 0              | -0.518379               | -0.006761 | 1.339938  |
| 8                | 1                | 0              | -1.291905               | -0.766305 | 1.274113  |
| 9                | 1                | 0              | 0.222467                | -0.247086 | 2.099606  |
| 10               | 1                | 0              | -0.943049               | 0.983812  | 1.481235  |
| 11               | 8                | 0              | -2.073451               | -1.624617 | -0.859765 |
| 12               | 1                | 0              | -2.106703               | -2.239668 | -1.600176 |
| 13               | 1                | 0              | -2.307424               | -0.740695 | -1.198262 |
| 14               | 8                | 0              | -2.837067               | 1.020693  | -0.839814 |
| 15               | 1                | 0              | -3.245694               | 0.710761  | -0.013832 |
| 16               | 1                | 0              | -2.131643               | 1.649789  | -0.603425 |
| 17               | 8                | 0              | -3.846921               | -0.733265 | 1.123303  |
| 18               | 1                | 0              | -4.786329               | -0.937981 | 1.062231  |
| 19               | 1                | 0              | -3.387657               | -1.350427 | 0.528525  |
| 20               | 8                | 0              | -0.672661               | 2.679433  | -0.217117 |
| 21               | 1                | 0              | -0.802270               | 3.250588  | 0.548734  |
| 22               | 1                | 0              | -0.395162               | 3.255469  | -0.938878 |
| 23               | 1                | 0              | 1.866988                | 1.878777  | 0.170785  |
| 24               | 1                | 0              | 0.474779                | -2.465903 | -0.437966 |
| 25               | 6                | 0              | 4.307611                | 0.257894  | 0.245492  |
| 26               | 1                | 0              | 4.712003                | -0.300925 | 1.092976  |
| 27               | 1                | 0              | 4.878734                | -0.034460 | -0.639055 |

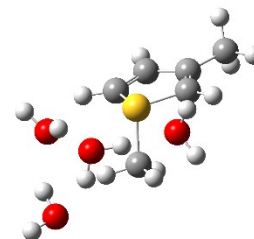

28            1            0            4.447860    1.323541    0.421826

-----

2e1-mt 4 H<sub>2</sub>O (in water)

Sum of electronic and zero-point Energies=            -976.723946 (Hartree/particle)

Sum of electronic and thermal Free Energies=        -976.772215 (Hartree/particle)

No imaginary frequencies

Standard orientation:

| Center<br>Number | Atomic<br>Number | Atomic<br>Type | Coordinates (Angstroms) |           |           |
|------------------|------------------|----------------|-------------------------|-----------|-----------|
|                  |                  |                | X                       | Y         | Z         |
| 1                | 6                | 0              | 1.925367                | -0.144026 | -0.028490 |
| 2                | 6                | 0              | 2.518059                | -1.346816 | 0.004576  |
| 3                | 6                | 0              | 1.609863                | -2.480216 | -0.148649 |
| 4                | 6                | 0              | 0.323989                | -2.138978 | -0.283196 |
| 5                | 16               | 0              | 0.172923                | -0.377395 | -0.349729 |
| 6                | 1                | 0              | 1.950014                | -3.508013 | -0.143049 |
| 7                | 6                | 0              | -0.534705               | 0.041551  | 1.272046  |
| 8                | 1                | 0              | -1.569321               | -0.289718 | 1.252028  |
| 9                | 1                | 0              | 0.041789                | -0.472164 | 2.038832  |
| 10               | 1                | 0              | -0.472138               | 1.123381  | 1.368762  |
| 11               | 8                | 0              | -2.624923               | -1.294626 | -0.753988 |
| 12               | 1                | 0              | -2.720780               | -1.896051 | -1.500064 |
| 13               | 1                | 0              | -2.676191               | -0.382798 | -1.097039 |
| 14               | 8                | 0              | -2.801196               | 1.431106  | -0.765170 |
| 15               | 1                | 0              | -3.168766               | 1.241479  | 0.114239  |
| 16               | 1                | 0              | -1.953554               | 1.893930  | -0.643165 |
| 17               | 8                | 0              | -3.990505               | -0.021071 | 1.338875  |
| 18               | 1                | 0              | -4.952771               | 0.015092  | 1.368292  |
| 19               | 1                | 0              | -3.756824               | -0.741359 | 0.730378  |
| 20               | 8                | 0              | -0.316718               | 2.631263  | -0.630757 |
| 21               | 1                | 0              | 0.131818                | 3.076071  | 0.097375  |
| 22               | 1                | 0              | 0.235664                | 2.758327  | -1.410164 |
| 23               | 1                | 0              | -0.560961               | -2.739445 | -0.425584 |
| 24               | 1                | 0              | 3.583483                | -1.472183 | 0.153468  |
| 25               | 6                | 0              | 2.477333                | 1.233183  | 0.137571  |
| 26               | 1                | 0              | 1.929201                | 1.740303  | 0.939849  |
| 27               | 1                | 0              | 2.286760                | 1.807096  | -0.774049 |
| 28               | 6                | 0              | 3.968469                | 1.212988  | 0.450329  |
| 29               | 1                | 0              | 4.334908                | 2.233039  | 0.570779  |
| 30               | 1                | 0              | 4.172596                | 0.668406  | 1.374508  |
| 31               | 1                | 0              | 4.534788                | 0.743441  | -0.356539 |

-----

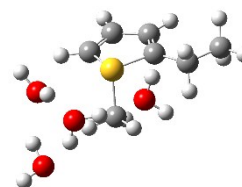

1-mbt 4 H<sub>2</sub>O (in water)

Sum of electronic and zero-point Energies=            -1051.752516 (Hartree/particle)

Sum of electronic and thermal Free Energies=        -1051.800347 (Hartree/particle)

No imaginary frequencies

Standard orientation:

| Center<br>Number | Atomic<br>Number | Atomic<br>Type | Coordinates (Angstroms) |           |           |
|------------------|------------------|----------------|-------------------------|-----------|-----------|
|                  |                  |                | X                       | Y         | Z         |
| 1                | 6                | 0              | 0.584658                | 2.220091  | 0.117587  |
| 2                | 6                | 0              | 1.906989                | 2.079688  | 0.230652  |
| 3                | 6                | 0              | 2.380289                | 0.704075  | 0.087755  |
| 4                | 6                | 0              | 1.339435                | -0.200326 | -0.150263 |
| 5                | 16               | 0              | -0.213677               | 0.670576  | -0.259962 |
| 6                | 6                | 0              | -0.982226               | 0.221376  | 1.325520  |
| 7                | 1                | 0              | -1.206132               | -0.839931 | 1.257650  |

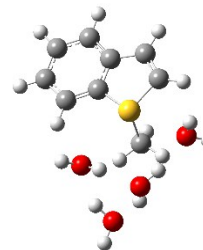

|    |   |   |           |           |           |
|----|---|---|-----------|-----------|-----------|
| 8  | 1 | 0 | -0.271731 | 0.434697  | 2.121305  |
| 9  | 1 | 0 | -1.888217 | 0.815935  | 1.415394  |
| 10 | 8 | 0 | -1.621356 | -1.882665 | -0.920251 |
| 11 | 1 | 0 | -1.430924 | -2.389083 | -1.717565 |
| 12 | 1 | 0 | -2.291451 | -1.210684 | -1.153266 |
| 13 | 8 | 0 | -3.617545 | -0.019495 | -0.742393 |
| 14 | 1 | 0 | -3.775271 | -0.471361 | 0.103039  |
| 15 | 1 | 0 | -3.294621 | 0.878446  | -0.545547 |
| 16 | 8 | 0 | -3.479675 | -2.066793 | 1.199202  |
| 17 | 1 | 0 | -4.169806 | -2.737926 | 1.157579  |
| 18 | 1 | 0 | -2.795214 | -2.334590 | 0.563218  |
| 19 | 8 | 0 | -2.440034 | 2.457145  | -0.335173 |
| 20 | 1 | 0 | -2.736544 | 3.049344  | 0.365392  |
| 21 | 1 | 0 | -2.378960 | 2.991696  | -1.135416 |
| 22 | 1 | 0 | 2.576118  | 2.910522  | 0.419765  |
| 23 | 6 | 0 | 1.536634  | -1.560643 | -0.301688 |
| 24 | 6 | 0 | 3.683223  | 0.222560  | 0.174060  |
| 25 | 1 | 0 | 4.504608  | 0.906762  | 0.353124  |
| 26 | 1 | 0 | 0.708838  | -2.232734 | -0.488565 |
| 27 | 6 | 0 | 2.847962  | -2.024854 | -0.201161 |
| 28 | 6 | 0 | 3.905073  | -1.144170 | 0.030265  |
| 29 | 1 | 0 | 4.915180  | -1.530583 | 0.099372  |
| 30 | 1 | 0 | 3.043874  | -3.084951 | -0.310116 |
| 31 | 1 | 0 | -0.034253 | 3.102917  | 0.166570  |

1,2-dmbt 4 H<sub>2</sub>O (in water)

Sum of electronic and zero-point Energies= -1091.032942 (Hartree/particle)

Sum of electronic and thermal Free Energies= -1091.082536 (Hartree/particle)

No imaginary frequencies

Standard orientation:

| Center<br>Number | Atomic<br>Number | Atomic<br>Type | Coordinates (Angstroms) |           |           |
|------------------|------------------|----------------|-------------------------|-----------|-----------|
|                  |                  |                | X                       | Y         | Z         |
| 1                | 6                | 0              | 0.705622                | 2.109751  | 0.093773  |
| 2                | 6                | 0              | 2.016063                | 1.866475  | 0.206030  |
| 3                | 6                | 0              | 2.410044                | 0.469841  | 0.058217  |
| 4                | 6                | 0              | 1.323014                | -0.376307 | -0.183486 |
| 5                | 16               | 0              | -0.176479               | 0.581703  | -0.306081 |
| 6                | 6                | 0              | -0.980051               | 0.198947  | 1.277030  |
| 7                | 1                | 0              | -1.355422               | -0.818470 | 1.193073  |
| 8                | 1                | 0              | -0.237717               | 0.293016  | 2.067307  |
| 9                | 1                | 0              | -1.797365               | 0.906201  | 1.398381  |
| 10               | 8                | 0              | -1.616152               | -1.990307 | -1.054981 |
| 11               | 1                | 0              | -1.383522               | -2.312850 | -1.932325 |
| 12               | 1                | 0              | -2.401051               | -1.416033 | -1.148363 |
| 13               | 8                | 0              | -3.793617               | -0.475152 | -0.444524 |
| 14               | 1                | 0              | -3.672031               | -0.914582 | 0.412256  |
| 15               | 1                | 0              | -3.479479               | 0.444118  | -0.364416 |
| 16               | 8                | 0              | -2.974581               | -2.575716 | 1.308262  |
| 17               | 1                | 0              | -3.626905               | -3.283978 | 1.344549  |
| 18               | 1                | 0              | -2.439444               | -2.731198 | 0.511476  |
| 19               | 8                | 0              | -2.716854               | 2.050996  | -0.534925 |
| 20               | 1                | 0              | -2.895346               | 2.750518  | 0.103996  |
| 21               | 1                | 0              | -2.644303               | 2.482483  | -1.394017 |
| 22               | 1                | 0              | 2.731566                | 2.655293  | 0.409363  |
| 23               | 6                | 0              | -0.046075               | 3.386210  | 0.223189  |
| 24               | 1                | 0              | -0.783841               | 3.331280  | 1.027567  |
| 25               | 1                | 0              | 0.663187                | 4.181752  | 0.454089  |
| 26               | 1                | 0              | -0.571746               | 3.637078  | -0.699673 |

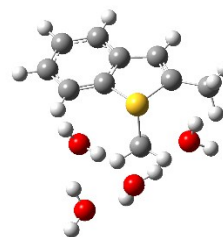

|    |   |   |          |           |           |
|----|---|---|----------|-----------|-----------|
| 27 | 6 | 0 | 1.446637 | -1.745849 | -0.331667 |
| 28 | 6 | 0 | 3.683752 | -0.084211 | 0.153258  |
| 29 | 1 | 0 | 4.540642 | 0.553138  | 0.339327  |
| 30 | 1 | 0 | 0.584587 | -2.371120 | -0.522027 |
| 31 | 6 | 0 | 2.729122 | -2.283222 | -0.220867 |
| 32 | 6 | 0 | 3.831319 | -1.461257 | 0.013991  |
| 33 | 1 | 0 | 4.818569 | -1.901582 | 0.093007  |
| 34 | 1 | 0 | 2.866215 | -3.353152 | -0.323749 |

1e2-mbt 4 H<sub>2</sub>O (in water)

Sum of electronic and zero-point Energies= -1130.310867 (Hartree/particle)

Sum of electronic and thermal Free Energies= -1130.363112 (Hartree/particle)

No imaginary frequencies

Standard orientation:

| Center<br>Number | Atomic<br>Number | Atomic<br>Type | Coordinates (Angstroms) |           |           |
|------------------|------------------|----------------|-------------------------|-----------|-----------|
|                  |                  |                | X                       | Y         | Z         |
| 1                | 6                | 0              | 0.693229                | 2.077179  | -0.127950 |
| 2                | 6                | 0              | 2.012162                | 1.867811  | -0.049712 |
| 3                | 6                | 0              | 2.429257                | 0.473067  | -0.145939 |
| 4                | 6                | 0              | 1.351354                | -0.403588 | -0.308902 |
| 5                | 16               | 0              | -0.165077               | 0.522010  | -0.441052 |
| 6                | 6                | 0              | -1.005521               | 0.172901  | 1.163317  |
| 7                | 1                | 0              | -1.281303               | -0.876608 | 1.061374  |
| 8                | 1                | 0              | -1.907922               | 0.783058  | 1.118336  |
| 9                | 8                | 0              | -1.538687               | -2.106198 | -1.124020 |
| 10               | 1                | 0              | -1.208093               | -2.441178 | -1.964691 |
| 11               | 1                | 0              | -2.311839               | -1.540631 | -1.312281 |
| 12               | 8                | 0              | -3.754265               | -0.572926 | -0.731342 |
| 13               | 1                | 0              | -3.675455               | -1.002252 | 0.136559  |
| 14               | 1                | 0              | -3.473643               | 0.355003  | -0.638993 |
| 15               | 8                | 0              | -3.047592               | -2.534306 | 1.191415  |
| 16               | 1                | 0              | -3.697047               | -3.243481 | 1.254803  |
| 17               | 1                | 0              | -2.452681               | -2.767726 | 0.459529  |
| 18               | 8                | 0              | -2.859533               | 2.026309  | -0.766455 |
| 19               | 1                | 0              | -2.925057               | 2.729100  | -0.110258 |
| 20               | 1                | 0              | -2.620079               | 2.451337  | -1.597563 |
| 21               | 1                | 0              | 2.717506                | 2.678046  | 0.097135  |
| 22               | 6                | 0              | -0.088908               | 3.335335  | -0.002882 |
| 23               | 1                | 0              | -0.816135               | 3.266738  | 0.811540  |
| 24               | 1                | 0              | 0.599450                | 4.152830  | 0.213828  |
| 25               | 1                | 0              | -0.631814               | 3.565327  | -0.921606 |
| 26               | 6                | 0              | 1.495587                | -1.777798 | -0.371495 |
| 27               | 6                | 0              | 3.715264                | -0.052972 | -0.057837 |
| 28               | 1                | 0              | 4.564825                | 0.609263  | 0.063338  |
| 29               | 1                | 0              | 0.640055                | -2.429337 | -0.488664 |
| 30               | 6                | 0              | 2.790214                | -2.286070 | -0.265527 |
| 31               | 6                | 0              | 3.884176                | -1.433489 | -0.116904 |
| 32               | 1                | 0              | 4.881056                | -1.852133 | -0.041275 |
| 33               | 1                | 0              | 2.942815                | -3.358113 | -0.301792 |
| 34               | 6                | 0              | -0.150330               | 0.450257  | 2.377047  |
| 35               | 1                | 0              | -0.718849               | 0.137789  | 3.255916  |
| 36               | 1                | 0              | 0.780427                | -0.119494 | 2.361392  |
| 37               | 1                | 0              | 0.076735                | 1.511494  | 2.484119  |

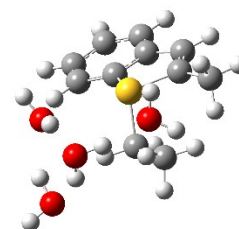

1b2-mbt 4 H<sub>2</sub>O (in water)

Sum of electronic and zero-point Energies= -1208.857721 (Hartree/particle)

Sum of electronic and thermal Free Energies= -1208.912445 (Hartree/particle)



No imaginary frequencies

Standard orientation:

| Center Number | Atomic Number | Atomic Type | Coordinates (Angstroms) |           |           |
|---------------|---------------|-------------|-------------------------|-----------|-----------|
|               |               |             | X                       | Y         | Z         |
| 1             | 6             | 0           | -0.811469               | -1.826958 | -1.098681 |
| 2             | 6             | 0           | -2.113047               | -1.696347 | -0.820122 |
| 3             | 6             | 0           | -2.542999               | -0.345969 | -0.472506 |
| 4             | 6             | 0           | -1.494720               | 0.580181  | -0.497811 |
| 5             | 16            | 0           | 0.001695                | -0.218227 | -1.041715 |
| 6             | 6             | 0           | 1.012387                | -0.327621 | 0.494567  |
| 7             | 1             | 0           | 1.311948                | 0.708069  | 0.657909  |
| 8             | 1             | 0           | 1.884916                | -0.903974 | 0.182558  |
| 9             | 8             | 0           | 1.334448                | 2.539892  | -1.022058 |
| 10            | 1             | 0           | 1.041166                | 3.188899  | -1.670826 |
| 11            | 1             | 0           | 2.095413                | 2.062930  | -1.406515 |
| 12            | 8             | 0           | 3.581061                | 1.009939  | -1.263917 |
| 13            | 1             | 0           | 3.576551                | 1.137311  | -0.301135 |
| 14            | 1             | 0           | 3.308628                | 0.093881  | -1.451247 |
| 15            | 8             | 0           | 3.019523                | 2.282544  | 1.210150  |
| 16            | 1             | 0           | 3.657609                | 2.964135  | 1.447398  |
| 17            | 1             | 0           | 2.380059                | 2.696843  | 0.606470  |
| 18            | 8             | 0           | 2.663832                | -1.457775 | -2.060302 |
| 19            | 1             | 0           | 2.771191                | -2.331963 | -1.668674 |
| 20            | 1             | 0           | 2.363180                | -1.600205 | -2.964805 |
| 21            | 1             | 0           | -2.792872               | -2.540950 | -0.832252 |
| 22            | 6             | 0           | -0.007313               | -3.035612 | -1.418240 |
| 23            | 1             | 0           | 0.792057                | -3.178639 | -0.684647 |
| 24            | 1             | 0           | -0.660957               | -3.908108 | -1.393422 |
| 25            | 1             | 0           | 0.448999                | -2.963102 | -2.407311 |
| 26            | 6             | 0           | -1.651267               | 1.914601  | -0.168869 |
| 27            | 6             | 0           | -3.813015               | 0.090244  | -0.105544 |
| 28            | 1             | 0           | -4.642013               | -0.607759 | -0.080818 |
| 29            | 1             | 0           | -0.815737               | 2.601682  | -0.198867 |
| 30            | 6             | 0           | -2.928614               | 2.328660  | 0.208841  |
| 31            | 6             | 0           | -3.993492               | 1.428002  | 0.234965  |
| 32            | 1             | 0           | -4.977450               | 1.775033  | 0.528248  |
| 33            | 1             | 0           | -3.091480               | 3.364678  | 0.481044  |
| 34            | 6             | 0           | 0.295903                | -0.930433 | 1.684707  |
| 35            | 1             | 0           | -0.615801               | -0.367444 | 1.907140  |
| 36            | 1             | 0           | 0.007199                | -1.963698 | 1.470997  |
| 37            | 6             | 0           | 1.222656                | -0.902635 | 2.902291  |
| 38            | 1             | 0           | 1.514893                | 0.131150  | 3.111202  |
| 39            | 1             | 0           | 2.141229                | -1.450647 | 2.669989  |
| 40            | 6             | 0           | 0.550616                | -1.510865 | 4.127410  |
| 41            | 1             | 0           | 1.214538                | -1.488745 | 4.994308  |
| 42            | 1             | 0           | -0.358813               | -0.963375 | 4.388724  |
| 43            | 1             | 0           | 0.273764                | -2.552654 | 3.944954  |

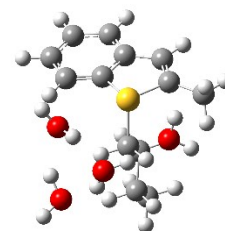

## TS neutral hydrolysis (4 H<sub>2</sub>O)

TS: 1,2,5-tmt + 4 H<sub>2</sub>O --> 2,5-dmt + CH<sub>3</sub>OH + H<sub>3</sub>O<sup>+</sup> + 2H<sub>2</sub>O (in water)

Sum of electronic and zero-point Energies= -976.697280 (Hartree/particle)

Sum of electronic and thermal Free Energies= -976.747505 (Hartree/particle)

One imaginary frequency (609.3431i cm<sup>-1</sup>)

Standard orientation:

| Center Number | Atomic Number | Atomic Type | Coordinates (Angstroms) |   |   |
|---------------|---------------|-------------|-------------------------|---|---|
|               |               |             | X                       | Y | Z |

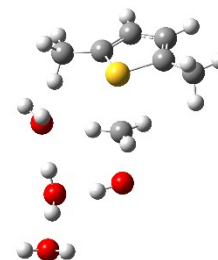

|    |    |   |           |           |           |
|----|----|---|-----------|-----------|-----------|
| 1  | 6  | 0 | -2.545735 | -1.129629 | -0.390089 |
| 2  | 6  | 0 | -3.424579 | -0.535830 | 0.445637  |
| 3  | 6  | 0 | -3.096991 | 0.834691  | 0.769238  |
| 4  | 6  | 0 | -1.966303 | 1.287267  | 0.185096  |
| 5  | 16 | 0 | -1.278393 | 0.015364  | -0.824233 |
| 6  | 1  | 0 | -4.290700 | -1.052412 | 0.841934  |
| 7  | 1  | 0 | -3.696402 | 1.453048  | 1.427069  |
| 8  | 6  | 0 | 0.335169  | -0.673077 | 0.631685  |
| 9  | 1  | 0 | 0.697889  | 0.340627  | 0.691259  |
| 10 | 1  | 0 | -0.398859 | -1.040591 | 1.335460  |
| 11 | 1  | 0 | 0.764459  | -1.346344 | -0.094967 |
| 12 | 6  | 0 | -2.503168 | -2.526174 | -0.912143 |
| 13 | 1  | 0 | -1.598510 | -3.043054 | -0.579414 |
| 14 | 1  | 0 | -3.368696 | -3.076406 | -0.541434 |
| 15 | 1  | 0 | -2.518853 | -2.549876 | -2.003873 |
| 16 | 6  | 0 | -1.291560 | 2.612742  | 0.298848  |
| 17 | 1  | 0 | -1.903253 | 3.273887  | 0.914042  |
| 18 | 1  | 0 | -0.308080 | 2.520372  | 0.769357  |
| 19 | 1  | 0 | -1.151592 | 3.078575  | -0.679392 |
| 20 | 8  | 0 | 1.806621  | -1.227957 | 1.874802  |
| 21 | 1  | 0 | 1.586724  | -0.884477 | 2.749908  |
| 22 | 1  | 0 | 2.530023  | -0.656173 | 1.510045  |
| 23 | 8  | 0 | 3.447524  | 0.434215  | 0.616742  |
| 24 | 1  | 0 | 4.193722  | 0.027321  | 0.136694  |
| 25 | 1  | 0 | 2.864684  | 0.852174  | -0.042964 |
| 26 | 8  | 0 | 5.616374  | -0.739030 | -0.622952 |
| 27 | 1  | 0 | 6.094081  | -0.166749 | -1.233492 |
| 28 | 1  | 0 | 5.446000  | -1.558803 | -1.100023 |
| 29 | 8  | 0 | 1.586815  | 1.591797  | -1.119248 |
| 30 | 1  | 0 | 1.538387  | 1.393681  | -2.061107 |
| 31 | 1  | 0 | 1.273586  | 2.497240  | -1.015752 |

TS: 1,3-dmt 4 H<sub>2</sub>O --> 3-mt + CH<sub>3</sub>OH H<sub>3</sub>O<sup>+</sup> 2H<sub>2</sub>O (in water)

Sum of electronic and zero-point Energies= -937.415789 (Hartree/particle)

Sum of electronic and thermal Free Energies= -937.464738 (Hartree/particle)

One imaginary frequency (605.1735i cm<sup>-1</sup>)

Standard orientation:

| Center Number | Atomic Number | Atomic Type | Coordinates (Angstroms) |           |           |
|---------------|---------------|-------------|-------------------------|-----------|-----------|
|               |               |             | X                       | Y         | Z         |
| 1             | 6             | 0           | -2.281242               | 0.064291  | -1.106345 |
| 2             | 6             | 0           | -3.320873               | -0.513177 | -0.464530 |
| 3             | 6             | 0           | -3.408906               | -0.087105 | 0.923171  |
| 4             | 6             | 0           | -2.451286               | 0.787427  | 1.285345  |
| 5             | 16            | 0           | -1.398023               | 1.150251  | -0.061223 |
| 6             | 1             | 0           | -4.172579               | -0.447976 | 1.601757  |
| 7             | 6             | 0           | 0.269283                | -0.281302 | 0.508848  |
| 8             | 1             | 0           | 0.602010                | 0.338472  | 1.328524  |
| 9             | 1             | 0           | -0.449388               | -1.070057 | 0.679176  |
| 10            | 1             | 0           | 0.747660                | -0.192659 | -0.455016 |
| 11            | 8             | 0           | 1.714379                | -1.630573 | 0.979276  |
| 12            | 1             | 0           | 1.591512                | -1.864543 | 1.907679  |
| 13            | 1             | 0           | 2.532088                | -1.068523 | 0.922786  |
| 14            | 8             | 0           | 3.707442                | 0.069260  | 0.694549  |
| 15            | 1             | 0           | 4.420032                | -0.266070 | 0.117134  |
| 16            | 1             | 0           | 3.268447                | 0.804200  | 0.224231  |
| 17            | 8             | 0           | 5.736470                | -0.924654 | -0.886960 |
| 18            | 1             | 0           | 5.590777                | -1.838971 | -1.154536 |
| 19            | 1             | 0           | 6.589827                | -0.909184 | -0.439520 |

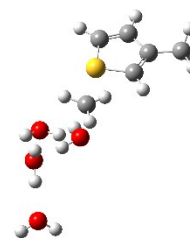

|    |   |   |           |           |           |
|----|---|---|-----------|-----------|-----------|
| 20 | 8 | 0 | 2.295741  | 2.068072  | -0.583904 |
| 21 | 1 | 0 | 1.901846  | 1.699236  | -1.382834 |
| 22 | 1 | 0 | 2.805256  | 2.836084  | -0.866870 |
| 23 | 1 | 0 | -1.961955 | -0.060009 | -2.131655 |
| 24 | 1 | 0 | -2.275025 | 1.257702  | 2.242270  |
| 25 | 6 | 0 | -4.281669 | -1.483210 | -1.074856 |
| 26 | 1 | 0 | -4.031915 | -1.686760 | -2.115854 |
| 27 | 1 | 0 | -4.274706 | -2.424828 | -0.520872 |
| 28 | 1 | 0 | -5.299629 | -1.088513 | -1.030318 |

TS: 2e1-mt 4 H<sub>2</sub>O --> 3-et + CH<sub>3</sub>OH H<sub>3</sub>O<sup>+</sup> 2H<sub>2</sub>O (in water)

Sum of electronic and zero-point Energies= -976.689772 (Hartree/particle)

Sum of electronic and thermal Free Energies= -976.739310 (Hartree/particle)

One imaginary frequency (610.0777i cm<sup>-1</sup>)

Standard orientation:

| Center Number | Atomic Number | Atomic Type | Coordinates (Angstroms) |           |           |
|---------------|---------------|-------------|-------------------------|-----------|-----------|
|               |               |             | X                       | Y         | Z         |
| 1             | 6             | 0           | 2.755038                | -0.025834 | 0.033680  |
| 2             | 6             | 0           | 3.096359                | -0.859511 | 1.041759  |
| 3             | 6             | 0           | 2.176092                | -1.957778 | 1.236328  |
| 4             | 6             | 0           | 1.141361                | -1.943503 | 0.372520  |
| 5             | 16            | 0           | 1.262266                | -0.588150 | -0.723714 |
| 6             | 1             | 0           | 3.984882                | -0.709388 | 1.643214  |
| 7             | 1             | 0           | 2.300376                | -2.714625 | 2.000478  |
| 8             | 6             | 0           | -0.291367               | 0.720468  | 0.311018  |
| 9             | 1             | 0           | -0.953702               | -0.127916 | 0.350281  |
| 10            | 1             | 0           | 0.361264                | 0.945110  | 1.143146  |
| 11            | 1             | 0           | -0.348870               | 1.400344  | -0.525218 |
| 12            | 6             | 0           | 3.455886                | 1.197859  | -0.468324 |
| 13            | 1             | 0           | 4.302936                | 1.377869  | 0.197653  |
| 14            | 1             | 0           | 3.869013                | 0.998874  | -1.462143 |
| 15            | 8             | 0           | -1.766250               | 1.820897  | 1.158435  |
| 16            | 1             | 0           | -1.868688               | 1.507452  | 2.065749  |
| 17            | 1             | 0           | -2.516955               | 1.444269  | 0.635000  |
| 18            | 8             | 0           | -3.442510               | 0.595045  | -0.511192 |
| 19            | 1             | 0           | -4.306155               | 0.275847  | -0.187194 |
| 20            | 1             | 0           | -2.935653               | -0.178329 | -0.818433 |
| 21            | 8             | 0           | -5.901470               | -0.209892 | 0.457035  |
| 22            | 1             | 0           | -6.597916               | -0.142243 | -0.205982 |
| 23            | 1             | 0           | -6.179952               | 0.345787  | 1.193721  |
| 24            | 8             | 0           | -1.716784               | -1.468198 | -1.338302 |
| 25            | 1             | 0           | -1.570924               | -1.599450 | -2.281931 |
| 26            | 1             | 0           | -1.770283               | -2.348842 | -0.949799 |
| 27            | 6             | 0           | 2.557644                | 2.433620  | -0.526660 |
| 28            | 1             | 0           | 3.141919                | 3.308079  | -0.818023 |
| 29            | 1             | 0           | 1.757628                | 2.317477  | -1.262913 |
| 30            | 1             | 0           | 2.101433                | 2.635617  | 0.445071  |
| 31            | 1             | 0           | 0.303426                | -2.620273 | 0.287019  |

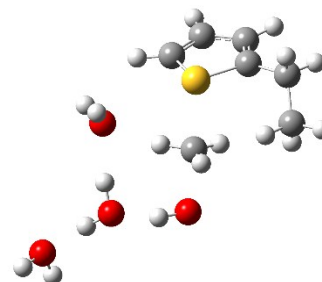

TS: 1-mbt 4 H<sub>2</sub>O --> bt + CH<sub>3</sub>OH H<sub>3</sub>O<sup>+</sup> 2H<sub>2</sub>O (in water)

Sum of electronic and zero-point Energies= -1051.716059 (Hartree/particle)

Sum of electronic and thermal Free Energies= -1051.764432 (Hartree/particle)

One imaginary frequency (618.4700i cm<sup>-1</sup>)

Standard orientation:

| Center | Atomic | Atomic | Coordinates (Angstroms) |  |  |
|--------|--------|--------|-------------------------|--|--|
|--------|--------|--------|-------------------------|--|--|

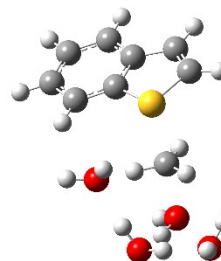

| Number | Number | Type | X         | Y         | Z         |
|--------|--------|------|-----------|-----------|-----------|
| 1      | 6      | 0    | 1.030791  | 2.374528  | -0.419911 |
| 2      | 6      | 0    | 2.232327  | 2.137416  | 0.130214  |
| 3      | 6      | 0    | 2.589703  | 0.729351  | 0.146253  |
| 4      | 6      | 0    | 1.594798  | -0.077863 | -0.426821 |
| 5      | 16     | 0    | 0.238064  | 0.903418  | -0.977537 |
| 6      | 6      | 0    | -1.127615 | 0.435472  | 0.787344  |
| 7      | 1      | 0    | -1.011427 | -0.611739 | 0.558306  |
| 8      | 1      | 0    | -0.464565 | 0.925178  | 1.487063  |
| 9      | 1      | 0    | -1.956246 | 0.983980  | 0.363249  |
| 10     | 8      | 0    | -2.349578 | -0.075383 | 2.286867  |
| 11     | 1      | 0    | -1.852666 | -0.642109 | 2.890609  |
| 12     | 1      | 0    | -2.948533 | -0.659444 | 1.757263  |
| 13     | 8      | 0    | -3.747395 | -1.363206 | 0.428505  |
| 14     | 1      | 0    | -4.263001 | -0.596496 | 0.109479  |
| 15     | 1      | 0    | -3.055135 | -1.522349 | -0.239812 |
| 16     | 8      | 0    | -5.069412 | 0.926902  | -0.326603 |
| 17     | 1      | 0    | -5.516711 | 0.931627  | -1.180116 |
| 18     | 1      | 0    | -4.433272 | 1.650777  | -0.353032 |
| 19     | 8      | 0    | -1.675780 | -1.620022 | -1.448560 |
| 20     | 1      | 0    | -1.846000 | -1.185144 | -2.292037 |
| 21     | 1      | 0    | -1.333736 | -2.495164 | -1.664792 |
| 22     | 1      | 0    | 0.526187  | 3.320205  | -0.559074 |
| 23     | 1      | 0    | 2.873508  | 2.915781  | 0.524968  |
| 24     | 6      | 0    | 3.745079  | 0.123263  | 0.648392  |
| 25     | 6      | 0    | 1.705423  | -1.461294 | -0.503144 |
| 26     | 1      | 0    | 0.924410  | -2.065540 | -0.949506 |
| 27     | 1      | 0    | 4.526604  | 0.730523  | 1.091402  |
| 28     | 6      | 0    | 2.860958  | -2.042387 | 0.006263  |
| 29     | 6      | 0    | 3.871068  | -1.256536 | 0.573865  |
| 30     | 1      | 0    | 4.763381  | -1.734268 | 0.961415  |
| 31     | 1      | 0    | 2.980294  | -3.118518 | -0.041188 |

TS: 12-dmbt 4 H<sub>2</sub>O --> 2-mbt + CH<sub>3</sub>OH H<sub>3</sub>O<sup>+</sup> 2H<sub>2</sub>O (in water)

Sum of electronic and zero-point Energies= -1090.997751 (Hartree/particle)

Sum of electronic and thermal Free Energies= -1091.049036 (Hartree/particle)

One imaginary frequency (607.7900i cm<sup>-1</sup>)

Standard orientation:

| Center Number | Atomic Number | Atomic Type | Coordinates (Angstroms) |           |           |
|---------------|---------------|-------------|-------------------------|-----------|-----------|
|               |               |             | X                       | Y         | Z         |
| 1             | 6             | 0           | 1.455434                | 2.102865  | -0.308514 |
| 2             | 6             | 0           | 2.574398                | 1.637543  | 0.274398  |
| 3             | 6             | 0           | 2.713626                | 0.192737  | 0.230155  |
| 4             | 6             | 0           | 1.636012                | -0.427877 | -0.421643 |
| 5             | 16            | 0           | 0.474293                | 0.775773  | -0.971793 |
| 6             | 6             | 0           | -1.015863               | 0.578066  | 0.748113  |
| 7             | 1             | 0           | -1.083968               | -0.477982 | 0.539706  |
| 8             | 1             | 0           | -0.298897               | 0.955730  | 1.464296  |
| 9             | 1             | 0           | -1.714654               | 1.257723  | 0.283286  |
| 10            | 8             | 0           | -2.355693               | 0.344711  | 2.209391  |
| 11            | 1             | 0           | -1.937718               | -0.195368 | 2.891985  |
| 12            | 1             | 0           | -2.994880               | -0.239684 | 1.724640  |
| 13            | 8             | 0           | -3.796514               | -1.167093 | 0.581146  |
| 14            | 1             | 0           | -4.576930               | -0.705021 | 0.218978  |
| 15            | 1             | 0           | -3.169476               | -1.297624 | -0.155085 |
| 16            | 8             | 0           | -6.007999               | 0.157812  | -0.410601 |
| 17            | 1             | 0           | -6.533077               | 0.576928  | 0.280559  |
| 18            | 1             | 0           | -6.607304               | -0.433076 | -0.880293 |

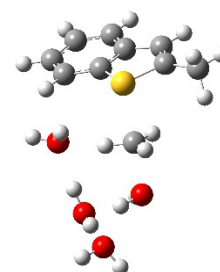

|    |   |   |           |           |           |
|----|---|---|-----------|-----------|-----------|
| 19 | 8 | 0 | -1.844835 | -1.490261 | -1.396764 |
| 20 | 1 | 0 | -2.007806 | -1.021271 | -2.223151 |
| 21 | 1 | 0 | -1.616535 | -2.393858 | -1.644028 |
| 22 | 1 | 0 | 3.303551  | 2.288655  | 0.742675  |
| 23 | 6 | 0 | 3.739476  | -0.606136 | 0.742268  |
| 24 | 6 | 0 | 1.546068  | -1.805315 | -0.576824 |
| 25 | 1 | 0 | 0.706126  | -2.260533 | -1.087874 |
| 26 | 1 | 0 | 4.582153  | -0.146663 | 1.246855  |
| 27 | 6 | 0 | 2.576605  | -2.580450 | -0.055763 |
| 28 | 6 | 0 | 3.662167  | -1.984844 | 0.596065  |
| 29 | 1 | 0 | 4.454174  | -2.610489 | 0.991204  |
| 30 | 1 | 0 | 2.536994  | -3.658362 | -0.161091 |
| 31 | 6 | 0 | 0.941959  | 3.496355  | -0.426545 |
| 32 | 1 | 0 | 0.784556  | 3.776002  | -1.470554 |
| 33 | 1 | 0 | -0.013106 | 3.605102  | 0.095468  |
| 34 | 1 | 0 | 1.659144  | 4.188411  | 0.015473  |

TS: 1e2-mbt 4 H<sub>2</sub>O --> 2-mbt + CH<sub>3</sub>CH<sub>2</sub>OH H<sub>3</sub>O<sup>+</sup> + 2H<sub>2</sub>O (in water)

Sum of electronic and zero-point Energies= -1130.276108 (Hartree/particle)

Sum of electronic and thermal Free Energies= -1130.326784 (Hartree/particle)

One imaginary frequency (568.6345i cm<sup>-1</sup>)

Standard orientation:

| Center Number | Atomic Number | Atomic Type | Coordinates (Angstroms) |           |           |
|---------------|---------------|-------------|-------------------------|-----------|-----------|
|               |               |             | X                       | Y         | Z         |
| 1             | 6             | 0           | 1.486176                | 2.122752  | -0.188002 |
| 2             | 6             | 0           | 2.576484                | 1.636636  | 0.434020  |
| 3             | 6             | 0           | 2.751582                | 0.203665  | 0.294731  |
| 4             | 6             | 0           | 1.736155                | -0.384343 | -0.477136 |
| 5             | 16            | 0           | 0.585510                | 0.833130  | -1.013847 |
| 6             | 6             | 0           | -1.047743               | 0.412164  | 0.680304  |
| 7             | 1             | 0           | -0.925733               | -0.621934 | 0.398060  |
| 8             | 1             | 0           | -0.366537               | 0.831880  | 1.409407  |
| 9             | 8             | 0           | -2.109335               | -0.364330 | 2.289480  |
| 10            | 1             | 0           | -1.498172               | -0.937024 | 2.769788  |
| 11            | 1             | 0           | -2.703938               | -0.953021 | 1.761400  |
| 12            | 8             | 0           | -3.547487               | -1.688852 | 0.468966  |
| 13            | 1             | 0           | -4.245975               | -1.047963 | 0.231914  |
| 14            | 1             | 0           | -2.917359               | -1.697036 | -0.275699 |
| 15            | 8             | 0           | -5.479409               | 0.186781  | -0.143467 |
| 16            | 1             | 0           | -6.087200               | -0.055395 | -0.851193 |
| 17            | 1             | 0           | -5.053079               | 1.004665  | -0.423527 |
| 18            | 8             | 0           | -1.658889               | -1.552085 | -1.598409 |
| 19            | 1             | 0           | -1.929842               | -0.949930 | -2.301027 |
| 20            | 1             | 0           | -1.376453               | -2.364429 | -2.034153 |
| 21            | 1             | 0           | 3.257046                | 2.265282  | 0.996637  |
| 22            | 6             | 0           | 3.758562                | -0.612519 | 0.818759  |
| 23            | 6             | 0           | 1.690277                | -1.749899 | -0.735262 |
| 24            | 1             | 0           | 0.899508                | -2.182935 | -1.336221 |
| 25            | 1             | 0           | 4.552933                | -0.176309 | 1.414380  |
| 26            | 6             | 0           | 2.699220                | -2.542528 | -0.199711 |
| 27            | 6             | 0           | 3.723641                | -1.977463 | 0.568909  |
| 28            | 1             | 0           | 4.500033                | -2.616563 | 0.973513  |
| 29            | 1             | 0           | 2.691664                | -3.610293 | -0.384838 |
| 30            | 6             | 0           | 0.962098                | 3.518289  | -0.227138 |
| 31            | 1             | 0           | 0.747564                | 3.839392  | -1.248563 |
| 32            | 1             | 0           | 0.039011                | 3.605463  | 0.352761  |
| 33            | 1             | 0           | 1.700388                | 4.195483  | 0.203562  |

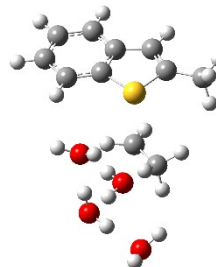

|    |   |   |           |          |           |
|----|---|---|-----------|----------|-----------|
| 34 | 6 | 0 | -2.158636 | 1.232904 | 0.110592  |
| 35 | 1 | 0 | -2.526645 | 0.808385 | -0.823005 |
| 36 | 1 | 0 | -2.983323 | 1.256803 | 0.826225  |
| 37 | 1 | 0 | -1.847987 | 2.265330 | -0.050841 |

-----

TS: 1b2-mbt 4 H<sub>2</sub>O --> 2-mbt + CH<sub>3</sub>CH<sub>2</sub>CH<sub>2</sub>CH<sub>2</sub>OH H<sub>3</sub>O<sup>+</sup> 2H<sub>2</sub>O (in water)

Sum of electronic and zero-point Energies= -1208.820409 (Hartree/particle)

Sum of electronic and thermal Free Energies= -1208.873723 (Hartree/particle)

One imaginary frequency (510.5460i cm<sup>-1</sup>)

Standard orientation:

| Center<br>Number | Atomic<br>Number | Atomic<br>Type | Coordinates (Angstroms) |           |           |
|------------------|------------------|----------------|-------------------------|-----------|-----------|
|                  |                  |                | X                       | Y         | Z         |
| 1                | 6                | 0              | -1.542496               | 1.854074  | 0.812942  |
| 2                | 6                | 0              | -2.518006               | 1.687893  | -0.099804 |
| 3                | 6                | 0              | -2.896414               | 0.305452  | -0.326736 |
| 4                | 6                | 0              | -2.163335               | -0.584972 | 0.473467  |
| 5                | 16               | 0              | -0.992748               | 0.289342  | 1.451768  |
| 6                | 6                | 0              | 0.732925                | -0.207534 | -0.115488 |
| 7                | 1                | 0              | 0.737579                | -1.195852 | 0.322476  |
| 8                | 1                | 0              | -0.003527               | -0.000932 | -0.880951 |
| 9                | 8                | 0              | 1.761282                | -1.192519 | -1.717781 |
| 10               | 1                | 0              | 1.145393                | -1.892801 | -1.966953 |
| 11               | 1                | 0              | 2.501028                | -1.625769 | -1.226103 |
| 12               | 8                | 0              | 3.717613                | -2.140201 | -0.148180 |
| 13               | 1                | 0              | 4.314596                | -1.368537 | -0.187050 |
| 14               | 1                | 0              | 3.239199                | -2.084256 | 0.701442  |
| 15               | 8                | 0              | 5.236066                | 0.172661  | -0.482288 |
| 16               | 1                | 0              | 4.885487                | 0.843661  | 0.115735  |
| 17               | 1                | 0              | 4.988135                | 0.460777  | -1.368996 |
| 18               | 8                | 0              | 2.166004                | -1.958015 | 2.146195  |
| 19               | 1                | 0              | 2.205016                | -1.076007 | 2.534839  |
| 20               | 1                | 0              | 2.398870                | -2.572260 | 2.851915  |
| 21               | 1                | 0              | -2.993475               | 2.522156  | -0.602867 |
| 22               | 6                | 0              | -3.852951               | -0.213194 | -1.204882 |
| 23               | 6                | 0              | -2.328463               | -1.963226 | 0.409795  |
| 24               | 1                | 0              | -1.742654               | -2.630600 | 1.032004  |
| 25               | 1                | 0              | -4.436799               | 0.455427  | -1.827825 |
| 26               | 6                | 0              | -3.283620               | -2.456335 | -0.472657 |
| 27               | 6                | 0              | -4.039412               | -1.587503 | -1.268505 |
| 28               | 1                | 0              | -4.778593               | -1.995988 | -1.948069 |
| 29               | 1                | 0              | -3.444834               | -3.525907 | -0.539610 |
| 30               | 6                | 0              | -0.972496               | 3.113515  | 1.373478  |
| 31               | 1                | 0              | -1.313388               | 3.260440  | 2.401791  |
| 32               | 1                | 0              | 0.119390                | 3.107049  | 1.386040  |
| 33               | 1                | 0              | -1.307451               | 3.961191  | 0.774480  |
| 34               | 6                | 0              | 1.839633                | 0.756159  | 0.184203  |
| 35               | 1                | 0              | 2.697104                | 0.185491  | 0.548462  |
| 36               | 1                | 0              | 1.538272                | 1.391515  | 1.021550  |
| 37               | 6                | 0              | 2.248447                | 1.654435  | -0.989718 |
| 38               | 1                | 0              | 3.000303                | 2.351646  | -0.608764 |
| 39               | 1                | 0              | 2.740797                | 1.047880  | -1.751574 |
| 40               | 6                | 0              | 1.098246                | 2.435683  | -1.616088 |
| 41               | 1                | 0              | 1.473392                | 3.105028  | -2.393302 |
| 42               | 1                | 0              | 0.362477                | 1.777286  | -2.085099 |
| 43               | 1                | 0              | 0.577580                | 3.047795  | -0.875481 |

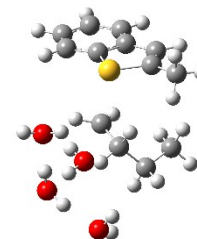

## Hydrolysis products

### 2,5-dmt (in water)

Sum of electronic and zero-point Energies= -631.452714 (Hartree/particle)

Sum of electronic and thermal Free Energies= -631.484190 (Hartree/particle)

No imaginary frequencies

Standard orientation:

| Center<br>Number | Atomic<br>Number | Atomic<br>Type | Coordinates (Angstroms) |           |           |
|------------------|------------------|----------------|-------------------------|-----------|-----------|
|                  |                  |                | X                       | Y         | Z         |
| 1                | 6                | 0              | 1.259504                | -0.125911 | -0.000010 |
| 2                | 6                | 0              | 0.716218                | -1.374690 | 0.000065  |
| 3                | 6                | 0              | -0.716218               | -1.374690 | -0.000079 |
| 4                | 6                | 0              | -1.259504               | -0.125911 | -0.000007 |
| 5                | 16               | 0              | 0.000000                | 1.075324  | 0.000045  |
| 6                | 1                | 0              | 1.322821                | -2.273039 | 0.000098  |
| 7                | 1                | 0              | -1.322820               | -2.273039 | -0.000135 |
| 8                | 6                | 0              | -2.702981               | 0.265567  | -0.000004 |
| 9                | 1                | 0              | -2.962647               | 0.856446  | 0.881596  |
| 10               | 1                | 0              | -2.962614               | 0.856537  | -0.881552 |
| 11               | 1                | 0              | -3.322941               | -0.632335 | -0.000064 |
| 12               | 6                | 0              | 2.702980                | 0.265567  | -0.000049 |
| 13               | 1                | 0              | 2.962619                | 0.856468  | -0.881643 |
| 14               | 1                | 0              | 2.962642                | 0.856515  | 0.881506  |
| 15               | 1                | 0              | 3.322941                | -0.632334 | -0.000031 |

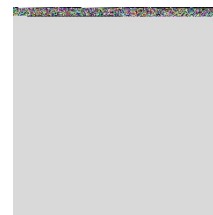

### 3-mt (in water)

Sum of electronic and zero-point Energies= -592.175366 (Hartree/particle)

Sum of electronic and thermal Free Energies= -592.204137 (Hartree/particle)

No imaginary frequencies

Standard orientation:

| Center<br>Number | Atomic<br>Number | Atomic<br>Type | Coordinates (Angstroms) |           |           |
|------------------|------------------|----------------|-------------------------|-----------|-----------|
|                  |                  |                | X                       | Y         | Z         |
| 1                | 6                | 0              | 1.035790                | 1.147308  | 0.000273  |
| 2                | 6                | 0              | -0.321641               | 1.244781  | -0.000034 |
| 3                | 6                | 0              | -0.979779               | -0.030634 | 0.000093  |
| 4                | 6                | 0              | -0.080577               | -1.056672 | 0.000049  |
| 5                | 16               | 0              | 1.553454                | -0.497266 | -0.000291 |
| 6                | 1                | 0              | -0.851915               | 2.189778  | -0.000039 |
| 7                | 1                | 0              | -0.285335               | -2.118428 | 0.000059  |
| 8                | 1                | 0              | 1.766090                | 1.944012  | 0.000437  |
| 9                | 6                | 0              | -2.470647               | -0.197015 | 0.000200  |
| 10               | 1                | 0              | -2.917011               | 0.272912  | 0.880076  |
| 11               | 1                | 0              | -2.917192               | 0.273143  | -0.879460 |
| 12               | 1                | 0              | -2.748778               | -1.251779 | 0.000099  |

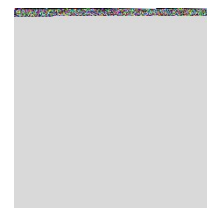

### 2-et (in water)

Sum of electronic and zero-point Energies= -631.448575 (Hartree/particle)

Sum of electronic and thermal Free Energies= -631.480981 (Hartree/particle)

No imaginary frequencies

Standard orientation:

| Center<br>Number | Atomic<br>Number | Atomic<br>Type | Coordinates (Angstroms) |   |   |
|------------------|------------------|----------------|-------------------------|---|---|
|                  |                  |                | X                       | Y | Z |

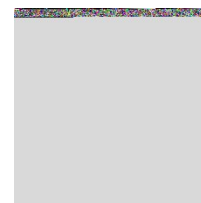

|    |    |   |           |           |           |
|----|----|---|-----------|-----------|-----------|
| 1  | 6  | 0 | 2.017731  | -0.431991 | 0.177085  |
| 2  | 6  | 0 | 1.917587  | 0.923905  | 0.229765  |
| 3  | 6  | 0 | 0.584058  | 1.384307  | -0.007883 |
| 4  | 6  | 0 | -0.307433 | 0.376851  | -0.238255 |
| 5  | 16 | 0 | 0.491383  | -1.165133 | -0.160502 |
| 6  | 1  | 0 | 2.757988  | 1.575954  | 0.431954  |
| 7  | 1  | 0 | 0.293610  | 2.428460  | -0.009788 |
| 8  | 6  | 0 | -1.780051 | 0.480733  | -0.503952 |
| 9  | 1  | 0 | -2.013476 | 0.051634  | -1.483134 |
| 10 | 1  | 0 | -2.027333 | 1.543894  | -0.557716 |
| 11 | 6  | 0 | -2.633270 | -0.199344 | 0.568030  |
| 12 | 1  | 0 | -3.695459 | -0.050341 | 0.363493  |
| 13 | 1  | 0 | -2.448149 | -1.275776 | 0.599928  |
| 14 | 1  | 0 | -2.414466 | 0.210952  | 1.556623  |
| 15 | 1  | 0 | 2.893420  | -1.049413 | 0.317936  |

bt (in water)

Sum of electronic and zero-point Energies= -706.473085 (Hartree/particle)  
 Sum of electronic and thermal Free Energies= -706.504076 (Hartree/particle)  
 No imaginary frequencies

Standard orientation:

| Center Number | Atomic Number | Atomic Type | Coordinates (Angstroms) |           |           |
|---------------|---------------|-------------|-------------------------|-----------|-----------|
|               |               |             | X                       | Y         | Z         |
| 1             | 6             | 0           | 0.109155                | 0.847460  | 0.000054  |
| 2             | 6             | 0           | -0.062213               | -0.551174 | -0.000044 |
| 3             | 6             | 0           | 1.028000                | -1.425751 | 0.000051  |
| 4             | 6             | 0           | 2.301728                | -0.882192 | 0.000256  |
| 5             | 6             | 0           | 2.492565                | 0.510655  | 0.000357  |
| 6             | 6             | 0           | 1.411480                | 1.373248  | 0.000257  |
| 7             | 6             | 0           | -1.152918               | 1.545510  | -0.000074 |
| 8             | 6             | 0           | -2.211035               | 0.704829  | -0.000249 |
| 9             | 1             | 0           | 0.880734                | -2.499879 | -0.000023 |
| 10            | 1             | 0           | 3.162625                | -1.541148 | 0.000337  |
| 11            | 1             | 0           | 3.500568                | 0.909566  | 0.000521  |
| 12            | 1             | 0           | 1.558863                | 2.448007  | 0.000335  |
| 13            | 1             | 0           | -1.242435               | 2.624621  | -0.000029 |
| 14            | 1             | 0           | -3.261297               | 0.961890  | -0.000363 |
| 15            | 16            | 0           | -1.756227               | -0.977410 | -0.000276 |

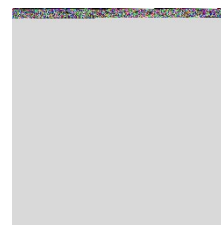

2-mbt (in water)

Sum of electronic and zero-point Energies= -745.762621 (Hartree/particle)  
 Sum of electronic and thermal Free Energies= -745.796033 (Hartree/particle)  
 No imaginary frequencies

Standard orientation:

| Center Number | Atomic Number | Atomic Type | Coordinates (Angstroms) |           |           |
|---------------|---------------|-------------|-------------------------|-----------|-----------|
|               |               |             | X                       | Y         | Z         |
| 1             | 6             | 0           | -0.399704               | 0.792853  | -0.000101 |
| 2             | 6             | 0           | -0.427481               | -0.615580 | -0.000053 |
| 3             | 6             | 0           | -1.628615               | -1.327121 | -0.000167 |
| 4             | 6             | 0           | -2.815826               | -0.610946 | -0.000318 |
| 5             | 6             | 0           | -2.808461               | 0.793174  | -0.000361 |
| 6             | 6             | 0           | -1.614902               | 1.494708  | -0.000257 |

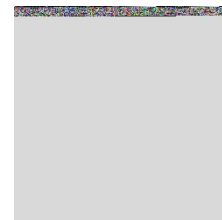



|    |    |   |           |           |           |
|----|----|---|-----------|-----------|-----------|
| 7  | 6  | 0 | 0.948531  | 1.305382  | 0.000047  |
| 8  | 6  | 0 | 1.895966  | 0.338631  | 0.000216  |
| 9  | 1  | 0 | -1.634627 | -2.411612 | -0.000132 |
| 10 | 1  | 0 | -3.760074 | -1.143956 | -0.000406 |
| 11 | 1  | 0 | -3.749306 | 1.332280  | -0.000478 |
| 12 | 1  | 0 | -1.610726 | 2.579824  | -0.000289 |
| 13 | 1  | 0 | 1.187134  | 2.362975  | 0.000041  |
| 14 | 16 | 0 | 1.192259  | -1.270802 | 0.000183  |
| 15 | 6  | 0 | 3.381845  | 0.494853  | 0.000453  |
| 16 | 1  | 0 | 3.830796  | 0.031793  | 0.882630  |
| 17 | 1  | 0 | 3.831151  | 0.031379  | -0.881323 |
| 18 | 1  | 0 | 3.641395  | 1.554434  | 0.000266  |

CH<sub>3</sub>OH (in water)

Sum of electronic and zero-point Energies= -115.652133 (Hartree/particle)

Sum of electronic and thermal Free Energies= -115.674944 (Hartree/particle)

No imaginary frequencies

Standard orientation:

| Center Number | Atomic Number | Atomic Type | Coordinates (Angstroms) |           |           |
|---------------|---------------|-------------|-------------------------|-----------|-----------|
|               |               |             | X                       | Y         | Z         |
| 1             | 6             | 0           | -0.047801               | 0.667548  | 0.000000  |
| 2             | 1             | 0           | -1.088100               | 0.989019  | 0.000000  |
| 3             | 1             | 0           | 0.446192                | 1.062694  | 0.890998  |
| 4             | 1             | 0           | 0.446192                | 1.062694  | -0.890998 |
| 5             | 8             | 0           | -0.047801               | -0.756886 | 0.000000  |
| 6             | 1             | 0           | 0.864928                | -1.064603 | 0.000000  |

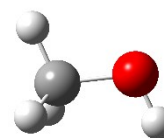

CH<sub>3</sub>CH<sub>2</sub>OH (in water)

Sum of electronic and zero-point Energies= -154.930260 (Hartree/particle)

Sum of electronic and thermal Free Energies= -154.955708 (Hartree/particle)

No imaginary frequencies

Standard orientation:

| Center Number | Atomic Number | Atomic Type | Coordinates (Angstroms) |           |           |
|---------------|---------------|-------------|-------------------------|-----------|-----------|
|               |               |             | X                       | Y         | Z         |
| 1             | 6             | 0           | 1.220728                | -0.222314 | 0.000066  |
| 2             | 1             | 0           | 1.294113                | -0.855567 | -0.887195 |
| 3             | 1             | 0           | 1.294082                | -0.855333 | 0.887494  |
| 4             | 1             | 0           | 2.068480                | 0.465948  | -0.000025 |
| 5             | 6             | 0           | -0.078091               | 0.547950  | -0.000062 |
| 6             | 1             | 0           | -0.147745               | 1.186545  | 0.886322  |
| 7             | 1             | 0           | -0.147584               | 1.186503  | -0.886498 |
| 8             | 8             | 0           | -1.153304               | -0.395486 | -0.000140 |
| 9             | 1             | 0           | -1.990732               | 0.081978  | 0.001001  |

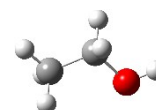

CH<sub>3</sub>CH<sub>2</sub>CH<sub>2</sub>CH<sub>2</sub>OH (in water)

Sum of electronic and zero-point Energies= -233.475235 (Hartree/particle)

Sum of electronic and thermal Free Energies= -233.505399 (Hartree/particle)

No imaginary frequencies

Standard orientation:

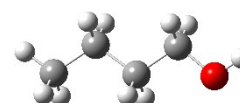

| Center Number | Atomic Number | Atomic Type | Coordinates (Angstroms) |           |           |
|---------------|---------------|-------------|-------------------------|-----------|-----------|
|               |               |             | X                       | Y         | Z         |
| 1             | 6             | 0           | 2.502679                | -0.291587 | -0.000095 |
| 2             | 1             | 0           | 2.553825                | -0.935162 | -0.882917 |
| 3             | 1             | 0           | 2.554314                | -0.934692 | 0.883040  |
| 4             | 1             | 0           | 3.390335                | 0.345444  | -0.000516 |
| 5             | 6             | 0           | 1.219712                | 0.532013  | 0.000042  |
| 6             | 1             | 0           | 1.202899                | 1.186913  | 0.877921  |
| 7             | 1             | 0           | 1.202705                | 1.186813  | -0.877903 |
| 8             | 6             | 0           | -0.026947               | -0.348926 | 0.000177  |
| 9             | 1             | 0           | -0.021168               | -0.999401 | 0.882065  |
| 10            | 1             | 0           | -0.021126               | -0.999719 | -0.881477 |
| 11            | 6             | 0           | -1.298545               | 0.470832  | -0.000017 |
| 12            | 1             | 0           | -1.335684               | 1.113537  | -0.886755 |
| 13            | 1             | 0           | -1.335865               | 1.113663  | 0.886621  |
| 14            | 8             | 0           | -2.417719               | -0.418994 | -0.000073 |
| 15            | 1             | 0           | -3.229888               | 0.100565  | -0.000140 |

CH<sub>3</sub>OH<sub>2</sub> (in water)

Sum of electronic and zero-point Energies= -116.049316 (Hartree/particle)

Sum of electronic and thermal Free Energies= -116.072427 (Hartree/particle)

No imaginary frequencies

Standard orientation:

| Center Number | Atomic Number | Atomic Type | Coordinates (Angstroms) |           |           |
|---------------|---------------|-------------|-------------------------|-----------|-----------|
|               |               |             | X                       | Y         | Z         |
| 1             | 6             | 0           | 0.001269                | 0.771656  | 0.000000  |
| 2             | 1             | 0           | -1.042928               | 1.063234  | 0.000000  |
| 3             | 1             | 0           | 0.508882                | 1.095918  | 0.902214  |
| 4             | 1             | 0           | 0.508882                | 1.095918  | -0.902214 |
| 5             | 8             | 0           | 0.001269                | -0.687304 | 0.000000  |
| 6             | 1             | 0           | 0.828452                | -1.189729 | 0.000000  |
| 7             | 1             | 0           | -0.821059               | -1.196848 | 0.000000  |

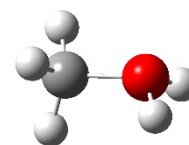

CH<sub>3</sub>CH<sub>2</sub>OH<sub>2</sub> (in water)

Sum of electronic and zero-point Energies= -155.332001 (Hartree/particle)

Sum of electronic and thermal Free Energies= -155.357600 (Hartree/particle)

No imaginary frequencies

Standard orientation:

| Center Number | Atomic Number | Atomic Type | Coordinates (Angstroms) |           |           |
|---------------|---------------|-------------|-------------------------|-----------|-----------|
|               |               |             | X                       | Y         | Z         |
| 1             | 6             | 0           | 1.266384                | -0.257787 | 0.029597  |
| 2             | 1             | 0           | 1.297703                | -0.984464 | -0.784122 |
| 3             | 1             | 0           | 1.317092                | -0.777689 | 0.986365  |
| 4             | 1             | 0           | 2.139093                | 0.391222  | -0.059769 |
| 5             | 6             | 0           | 0.038206                | 0.599031  | -0.058399 |
| 6             | 1             | 0           | -0.063978               | 1.296381  | 0.767889  |
| 7             | 1             | 0           | -0.075069               | 1.107849  | -1.012249 |
| 8             | 8             | 0           | -1.153097               | -0.290453 | 0.093186  |
| 9             | 1             | 0           | -1.992319               | 0.201527  | 0.142519  |
| 10            | 1             | 0           | -1.225286               | -0.958667 | -0.613306 |

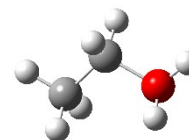

CH<sub>3</sub>CH<sub>2</sub>CH<sub>2</sub>CH<sub>2</sub>OH<sub>2</sub> (in water)

Sum of electronic and zero-point Energies= -233.877073 (Hartree/particle)

Sum of electronic and thermal Free Energies= -233.907118 (Hartree/particle)

No imaginary frequencies

Standard orientation:

| Center Number | Atomic Number | Atomic Type | Coordinates (Angstroms) |           |           |
|---------------|---------------|-------------|-------------------------|-----------|-----------|
|               |               |             | X                       | Y         | Z         |
| 1             | 6             | 0           | -2.549608               | -0.331708 | 0.002580  |
| 2             | 1             | 0           | -2.590964               | -0.939080 | 0.910574  |
| 3             | 1             | 0           | -2.575493               | -1.009643 | -0.854590 |
| 4             | 1             | 0           | -3.451324               | 0.283451  | -0.029444 |
| 5             | 6             | 0           | -1.292183               | 0.529054  | -0.019865 |
| 6             | 1             | 0           | -1.286152               | 1.155750  | -0.917051 |
| 7             | 1             | 0           | -1.291753               | 1.206861  | 0.839540  |
| 8             | 6             | 0           | -0.026555               | -0.328013 | 0.005826  |
| 9             | 1             | 0           | 0.004946                | -0.972455 | -0.878066 |
| 10            | 1             | 0           | -0.027267               | -0.971030 | 0.891502  |
| 11            | 6             | 0           | 1.194468                | 0.553843  | 0.029623  |
| 12            | 1             | 0           | 1.292017                | 1.138867  | 0.940546  |
| 13            | 1             | 0           | 1.284650                | 1.196326  | -0.842985 |
| 14            | 8             | 0           | 2.450002                | -0.250974 | -0.005363 |
| 15            | 1             | 0           | 2.515484                | -0.896214 | 0.723025  |
| 16            | 1             | 0           | 2.569106                | -0.724098 | -0.849129 |

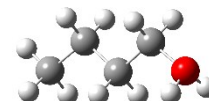

CH<sub>3</sub>OH H<sub>3</sub>O<sup>+</sup> 2H<sub>2</sub>O (in water)

Sum of electronic and zero-point Energies= -345.295283 (Hartree/particle)

Sum of electronic and thermal Free Energies= -345.331809 (Hartree/particle)

No imaginary frequencies

Standard orientation:

| Center Number | Atomic Number | Atomic Type | Coordinates (Angstroms) |           |           |
|---------------|---------------|-------------|-------------------------|-----------|-----------|
|               |               |             | X                       | Y         | Z         |
| 1             | 6             | 0           | 2.258293                | -0.481433 | 0.461615  |
| 2             | 1             | 0           | 2.513676                | 0.353132  | -0.194045 |
| 3             | 1             | 0           | 3.165007                | -0.999538 | 0.774140  |
| 4             | 1             | 0           | 1.730891                | -0.113632 | 1.340038  |
| 5             | 8             | 0           | 1.371842                | -1.393533 | -0.200713 |
| 6             | 1             | 0           | 1.805263                | -1.756072 | -0.982423 |
| 7             | 1             | 0           | 0.096674                | -0.597178 | -0.573094 |
| 8             | 8             | 0           | -0.661221               | 0.053399  | -0.755638 |
| 9             | 1             | 0           | -1.506411               | -0.253194 | -0.289304 |
| 10            | 1             | 0           | -0.384989               | 0.966190  | -0.411776 |
| 11            | 8             | 0           | -2.838408               | -0.682626 | 0.390235  |
| 12            | 1             | 0           | -3.354621               | -1.277331 | -0.166582 |
| 13            | 1             | 0           | -2.704105               | -1.138403 | 1.229560  |
| 14            | 8             | 0           | 0.117585                | 2.330230  | 0.137111  |
| 15            | 1             | 0           | 0.156012                | 3.012581  | -0.543880 |
| 16            | 1             | 0           | 1.014463                | 2.232282  | 0.479723  |

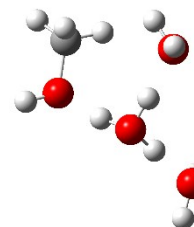

CH<sub>3</sub>CH<sub>2</sub>OH H<sub>3</sub>O<sup>+</sup> 2H<sub>2</sub>O (in water)

Sum of electronic and zero-point Energies= -384.573377 (Hartree/particle)

Sum of electronic and thermal Free Energies= -384.611441 (Hartree/particle)

No imaginary frequencies

Standard orientation:

| Center | Atomic | Atomic | Coordinates (Angstroms) |  |  |
|--------|--------|--------|-------------------------|--|--|
|--------|--------|--------|-------------------------|--|--|

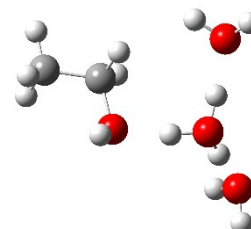

| Number | Number | Type | X         | Y         | Z         |
|--------|--------|------|-----------|-----------|-----------|
| 1      | 6      | 0    | -1.756493 | 0.035489  | -0.148641 |
| 2      | 1      | 0    | -1.768266 | 0.961840  | 0.432322  |
| 3      | 1      | 0    | -1.164568 | 0.201200  | -1.049694 |
| 4      | 8      | 0    | -1.041133 | -0.972734 | 0.591913  |
| 5      | 1      | 0    | -1.490563 | -1.133589 | 1.431778  |
| 6      | 1      | 0    | 0.405803  | -0.443175 | 0.778577  |
| 7      | 8      | 0    | 1.300829  | 0.035647  | 0.800786  |
| 8      | 1      | 0    | 1.980797  | -0.470033 | 0.244440  |
| 9      | 1      | 0    | 1.164155  | 0.961672  | 0.415556  |
| 10     | 8      | 0    | 3.073012  | -1.208782 | -0.574371 |
| 11     | 1      | 0    | 3.464187  | -1.948218 | -0.094221 |
| 12     | 1      | 0    | 2.734228  | -1.566539 | -1.403551 |
| 13     | 8      | 0    | 0.873114  | 2.363231  | -0.219285 |
| 14     | 1      | 0    | 1.130416  | 3.096485  | 0.352109  |
| 15     | 1      | 0    | -0.067008 | 2.474740  | -0.406079 |
| 16     | 6      | 0    | -3.158439 | -0.417848 | -0.483118 |
| 17     | 1      | 0    | -3.727745 | -0.614692 | 0.428770  |
| 18     | 1      | 0    | -3.677003 | 0.362418  | -1.044352 |
| 19     | 1      | 0    | -3.141413 | -1.326852 | -1.087436 |

CH<sub>3</sub>CH<sub>2</sub>CH<sub>2</sub>CH<sub>2</sub>OH H<sub>3</sub>O<sup>+</sup> + 2H<sub>2</sub>O (in water)

Sum of electronic and zero-point Energies= -463.119009 (Hartree/particle)

Sum of electronic and thermal Free Energies= -463.161613 (Hartree/particle)

No imaginary frequencies

Standard orientation:

| Center Number | Atomic Number | Atomic Type | Coordinates (Angstroms) |           |           |
|---------------|---------------|-------------|-------------------------|-----------|-----------|
|               |               |             | X                       | Y         | Z         |
| 1             | 6             | 0           | 0.674432                | -0.124954 | -0.235626 |
| 2             | 1             | 0           | 0.608393                | 0.797080  | -0.822218 |
| 3             | 1             | 0           | 0.292925                | 0.075463  | 0.767379  |
| 4             | 8             | 0           | -0.224787               | -1.101950 | -0.794337 |
| 5             | 1             | 0           | 0.045704                | -1.304598 | -1.699351 |
| 6             | 1             | 0           | -1.633001               | -0.481621 | -0.766514 |
| 7             | 8             | 0           | -2.502022               | 0.042988  | -0.692299 |
| 8             | 1             | 0           | -3.123633               | -0.404189 | -0.029656 |
| 9             | 1             | 0           | -2.273536               | 0.978459  | -0.379868 |
| 10            | 8             | 0           | -4.111777               | -1.072678 | 0.970829  |
| 11            | 1             | 0           | -4.757108               | -1.635616 | 0.527082  |
| 12            | 1             | 0           | -3.658347               | -1.629318 | 1.614807  |
| 13            | 8             | 0           | -1.815888               | 2.388778  | 0.111454  |
| 14            | 1             | 0           | -2.157130               | 3.111474  | -0.428439 |
| 15            | 1             | 0           | -0.853623               | 2.460133  | 0.092262  |
| 16            | 6             | 0           | 2.099696                | -0.635476 | -0.190516 |
| 17            | 1             | 0           | 2.418866                | -0.887261 | -1.208821 |
| 18            | 1             | 0           | 2.131412                | -1.558881 | 0.397249  |
| 19            | 6             | 0           | 3.051534                | 0.397558  | 0.406886  |
| 20            | 1             | 0           | 2.720981                | 0.652736  | 1.419253  |
| 21            | 1             | 0           | 3.001815                | 1.320884  | -0.179951 |
| 22            | 6             | 0           | 4.489394                | -0.108091 | 0.446814  |
| 23            | 1             | 0           | 4.849709                | -0.341757 | -0.558780 |
| 24            | 1             | 0           | 5.164721                | 0.634369  | 0.877883  |
| 25            | 1             | 0           | 4.567301                | -1.018690 | 1.047153  |

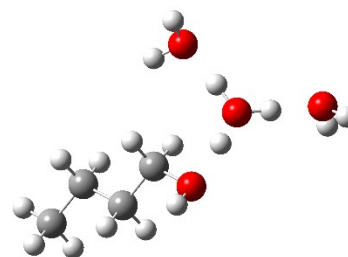

Methanolysis S<sub>N</sub>2

## Thiophenium cations + nucleophile

1,2,5-tmt CH<sub>3</sub>OH (in methanol)

Sum of electronic and zero-point Energies= -786.765605 (Hartree/particle)

Sum of electronic and thermal Free Energies= -786.807220 (Hartree/particle)

No imaginary frequencies

Standard orientation:

| Center Number | Atomic Number | Atomic Type | Coordinates (Angstroms) |           |           |
|---------------|---------------|-------------|-------------------------|-----------|-----------|
|               |               |             | X                       | Y         | Z         |
| 1             | 6             | 0           | -1.311822               | 1.407476  | 0.104486  |
| 2             | 6             | 0           | -1.992856               | 0.993680  | 1.181067  |
| 3             | 6             | 0           | -2.262073               | -0.440201 | 1.235868  |
| 4             | 6             | 0           | -1.792815               | -1.150366 | 0.201639  |
| 5             | 16            | 0           | -1.053855               | -0.008367 | -0.964624 |
| 6             | 1             | 0           | -2.306203               | 1.677413  | 1.961385  |
| 7             | 1             | 0           | -2.787384               | -0.906566 | 2.061206  |
| 8             | 6             | 0           | 0.723564                | -0.336379 | -0.755132 |
| 9             | 1             | 0           | 0.948886                | -0.336503 | 0.309614  |
| 10            | 1             | 0           | 0.920928                | -1.303183 | -1.216148 |
| 11            | 1             | 0           | 1.252164                | 0.450557  | -1.291072 |
| 12            | 6             | 0           | -1.819489               | -2.603409 | -0.111605 |
| 13            | 1             | 0           | -2.368576               | -2.804111 | -1.034384 |
| 14            | 1             | 0           | -0.807933               | -3.003787 | -0.223680 |
| 15            | 1             | 0           | -2.309762               | -3.130221 | 0.707868  |
| 16            | 6             | 0           | -0.825419               | 2.745900  | -0.322695 |
| 17            | 1             | 0           | 0.256262                | 2.744107  | -0.482766 |
| 18            | 1             | 0           | -1.305974               | 3.064992  | -1.250490 |
| 19            | 1             | 0           | -1.057382               | 3.469972  | 0.459144  |
| 20            | 6             | 0           | 3.894081                | -0.184036 | 0.302997  |
| 21            | 1             | 0           | 3.438389                | -0.603663 | 1.199456  |
| 22            | 1             | 0           | 3.584844                | -0.774040 | -0.564832 |
| 23            | 1             | 0           | 3.554884                | 0.848838  | 0.181842  |
| 24            | 8             | 0           | 5.303793                | -0.246640 | 0.486232  |
| 25            | 1             | 0           | 5.739172                | 0.117183  | -0.292772 |

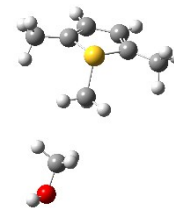

1,3-dmt CH<sub>3</sub>OH (in methanol)

Sum of electronic and zero-point Energies= -747.483802 (Hartree/particle)

Sum of electronic and thermal Free Energies= -747.521582 (Hartree/particle)

No imaginary frequencies

Standard orientation:

| Center Number | Atomic Number | Atomic Type | Coordinates (Angstroms) |           |           |
|---------------|---------------|-------------|-------------------------|-----------|-----------|
|               |               |             | X                       | Y         | Z         |
| 1             | 6             | 0           | -0.334574               | 0.357608  | -1.060739 |
| 2             | 6             | 0           | -0.251329               | 1.414350  | -0.237675 |
| 3             | 6             | 0           | -1.098386               | 1.274578  | 0.957872  |
| 4             | 6             | 0           | -1.806940               | 0.144963  | 1.007214  |
| 5             | 16            | 0           | -1.541220               | -0.791262 | -0.474137 |
| 6             | 1             | 0           | -1.130095               | 2.030390  | 1.734590  |
| 7             | 1             | 0           | -2.502190               | -0.231386 | 1.744587  |
| 8             | 6             | 0           | -0.564400               | -2.205869 | 0.126197  |
| 9             | 1             | 0           | -1.256153               | -2.852409 | 0.664555  |
| 10            | 1             | 0           | -0.177330               | -2.717078 | -0.753759 |
| 11            | 1             | 0           | 0.229042                | -1.835797 | 0.771202  |
| 12            | 6             | 0           | 0.610801                | 2.610719  | -0.449323 |

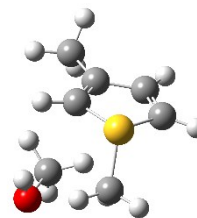

|    |   |   |           |           |           |
|----|---|---|-----------|-----------|-----------|
| 13 | 1 | 0 | -0.008366 | 3.510501  | -0.501350 |
| 14 | 1 | 0 | 1.288323  | 2.733764  | 0.400209  |
| 15 | 1 | 0 | 1.193674  | 2.527737  | -1.365825 |
| 16 | 1 | 0 | 0.138959  | 0.174398  | -2.015886 |
| 17 | 8 | 0 | 2.686068  | -1.331566 | -0.115914 |
| 18 | 1 | 0 | 2.081822  | -1.235777 | -0.861080 |
| 19 | 6 | 0 | 2.661535  | -0.142464 | 0.665240  |
| 20 | 1 | 0 | 3.446972  | -0.237550 | 1.414881  |
| 21 | 1 | 0 | 2.864464  | 0.739301  | 0.051439  |
| 22 | 1 | 0 | 1.701610  | -0.016689 | 1.177231  |

2e1- mt CH<sub>3</sub>OH (in methanol)

Sum of electronic and zero-point Energies= -786.760023 (Hartree/particle)

Sum of electronic and thermal Free Energies= -786.800311 (Hartree/particle)

No imaginary frequencies

Standard orientation:

| Center<br>Number | Atomic<br>Number | Atomic<br>Type | Coordinates (Angstroms) |           |           |
|------------------|------------------|----------------|-------------------------|-----------|-----------|
|                  |                  |                | X                       | Y         | Z         |
| 1                | 6                | 0              | -1.209362               | 0.079542  | -0.241376 |
| 2                | 6                | 0              | -0.686614               | -0.597213 | -1.273728 |
| 3                | 6                | 0              | 0.536880                | -0.023709 | -1.828698 |
| 4                | 6                | 0              | 0.961295                | 1.082839  | -1.209069 |
| 5                | 16               | 0              | -0.224807               | 1.557780  | 0.014923  |
| 6                | 1                | 0              | -1.121648               | -1.513324 | -1.654378 |
| 7                | 1                | 0              | 1.065087                | -0.470438 | -2.662293 |
| 8                | 1                | 0              | 1.809028                | 1.725244  | -1.401271 |
| 9                | 6                | 0              | -2.388234               | -0.169530 | 0.639676  |
| 10               | 1                | 0              | -2.045242               | -0.217864 | 1.679703  |
| 11               | 1                | 0              | -3.070637               | 0.684167  | 0.579628  |
| 12               | 6                | 0              | -3.116024               | -1.456506 | 0.269403  |
| 13               | 1                | 0              | -3.960397               | -1.606128 | 0.943865  |
| 14               | 1                | 0              | -3.500743               | -1.414383 | -0.751702 |
| 15               | 1                | 0              | -2.457847               | -2.323935 | 0.355754  |
| 16               | 6                | 0              | 0.582002                | 1.228179  | 1.611240  |
| 17               | 1                | 0              | 1.387732                | 1.953797  | 1.712142  |
| 18               | 1                | 0              | -0.172895               | 1.400615  | 2.377296  |
| 19               | 1                | 0              | 0.941132                | 0.201565  | 1.612173  |
| 20               | 8                | 0              | 1.916206                | -1.606796 | 0.732418  |
| 21               | 1                | 0              | 1.880406                | -2.521260 | 0.429324  |
| 22               | 6                | 0              | 3.162947                | -1.036324 | 0.350178  |
| 23               | 1                | 0              | 3.304112                | -1.069377 | -0.733777 |
| 24               | 1                | 0              | 3.154753                | 0.006089  | 0.671718  |
| 25               | 1                | 0              | 3.997078                | -1.548562 | 0.837953  |

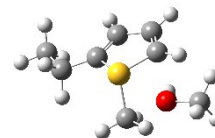

1-mbt CH<sub>3</sub>OH (in methanol)

Sum of electronic and zero-point Energies= -861.788835 (Hartree/particle)

Sum of electronic and thermal Free Energies= -861.828273 (Hartree/particle)

No imaginary frequencies

Standard orientation:

| Center<br>Number | Atomic<br>Number | Atomic<br>Type | Coordinates (Angstroms) |           |           |
|------------------|------------------|----------------|-------------------------|-----------|-----------|
|                  |                  |                | X                       | Y         | Z         |
| 1                | 6                | 0              | -0.173394               | -1.321882 | -0.417880 |
| 2                | 6                | 0              | -0.258876               | -0.438519 | 0.662786  |
| 3                | 6                | 0              | 0.794253                | -0.151524 | 1.508504  |

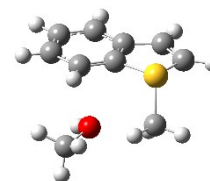

|    |    |   |           |           |           |
|----|----|---|-----------|-----------|-----------|
| 4  | 6  | 0 | 2.004990  | -0.788957 | 1.237430  |
| 5  | 6  | 0 | 2.121467  | -1.680500 | 0.171044  |
| 6  | 6  | 0 | 1.039263  | -1.958625 | -0.660946 |
| 7  | 6  | 0 | -1.419619 | -1.405372 | -1.177328 |
| 8  | 6  | 0 | -2.399336 | -0.621622 | -0.721824 |
| 9  | 1  | 0 | 0.694907  | 0.539135  | 2.338188  |
| 10 | 1  | 0 | 2.862738  | -0.586994 | 1.868849  |
| 11 | 1  | 0 | 3.072608  | -2.167414 | -0.012483 |
| 12 | 1  | 0 | 1.135047  | -2.653276 | -1.487858 |
| 13 | 1  | 0 | -1.534381 | -2.043060 | -2.046179 |
| 14 | 1  | 0 | -3.412445 | -0.487613 | -1.074095 |
| 15 | 16 | 0 | -1.900728 | 0.245668  | 0.753813  |
| 16 | 6  | 0 | -1.645950 | 1.947961  | 0.163707  |
| 17 | 1  | 0 | -1.025504 | 1.920211  | -0.729787 |
| 18 | 1  | 0 | -1.172773 | 2.489837  | 0.981474  |
| 19 | 1  | 0 | -2.634811 | 2.360003  | -0.036384 |
| 20 | 8  | 0 | 1.410960  | 1.489922  | -1.382834 |
| 21 | 1  | 0 | 2.090200  | 1.098001  | -1.943434 |
| 22 | 6  | 0 | 2.026072  | 2.386275  | -0.465993 |
| 23 | 1  | 0 | 2.505376  | 3.220153  | -0.987399 |
| 24 | 1  | 0 | 1.240883  | 2.781275  | 0.179609  |
| 25 | 1  | 0 | 2.768904  | 1.876255  | 0.154162  |

1,2-dmbt CH<sub>3</sub>OH (in methanol)

Sum of electronic and zero-point Energies= -901.073635 (Hartree/particle)

Sum of electronic and thermal Free Energies= -901.114881 (Hartree/particle)

No imaginary frequencies

Standard orientation:

| Center<br>Number | Atomic<br>Number | Atomic<br>Type | Coordinates (Angstroms) |           |           |
|------------------|------------------|----------------|-------------------------|-----------|-----------|
|                  |                  |                | X                       | Y         | Z         |
| 1                | 6                | 0              | 0.516756                | 0.817140  | 0.777541  |
| 2                | 6                | 0              | 0.423667                | 0.655119  | -0.608414 |
| 3                | 6                | 0              | 1.515506                | 0.621272  | -1.455320 |
| 4                | 6                | 0              | 2.773633                | 0.735011  | -0.864443 |
| 5                | 6                | 0              | 2.900036                | 0.896844  | 0.515499  |
| 6                | 6                | 0              | 1.781692                | 0.939788  | 1.345273  |
| 7                | 6                | 0              | -0.785749               | 0.812623  | 1.439137  |
| 8                | 6                | 0              | -1.841433               | 0.671552  | 0.630943  |
| 9                | 1                | 0              | 1.404387                | 0.511250  | -2.528202 |
| 10               | 1                | 0              | 3.658625                | 0.706148  | -1.489287 |
| 11               | 1                | 0              | 3.888384                | 0.993219  | 0.950661  |
| 12               | 1                | 0              | 1.888218                | 1.069822  | 2.416551  |
| 13               | 1                | 0              | -0.894243               | 0.899777  | 2.514793  |
| 14               | 16               | 0              | -1.287739               | 0.620073  | -1.086558 |
| 15               | 6                | 0              | -1.596828               | -1.105881 | -1.561379 |
| 16               | 1                | 0              | -2.664909               | -1.183485 | -1.763160 |
| 17               | 1                | 0              | -1.285048               | -1.756180 | -0.746892 |
| 18               | 1                | 0              | -1.034001               | -1.283236 | -2.477414 |
| 19               | 6                | 0              | -3.299171               | 0.573174  | 0.902962  |
| 20               | 1                | 0              | -3.701711               | -0.378701 | 0.544710  |
| 21               | 1                | 0              | -3.461762               | 0.632255  | 1.979749  |
| 22               | 1                | 0              | -3.852449               | 1.381499  | 0.418909  |
| 23               | 8                | 0              | 0.018032                | -2.421411 | 0.950402  |
| 24               | 1                | 0              | 0.226350                | -2.351324 | 1.889332  |
| 25               | 6                | 0              | 1.226499                | -2.594317 | 0.217756  |
| 26               | 1                | 0              | 1.698515                | -3.551456 | 0.458381  |
| 27               | 1                | 0              | 0.967926                | -2.588693 | -0.841773 |
| 28               | 1                | 0              | 1.933641                | -1.784728 | 0.418036  |

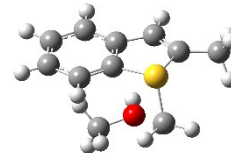

1e2-mbt CH<sub>3</sub>OH (in methanol)

Sum of electronic and zero-point Energies= -940.347709 (Hartree/particle)  
 Sum of electronic and thermal Free Energies= -940.393184 (Hartree/particle)  
 No imaginary frequencies

Standard orientation:

| Center Number | Atomic Number | Atomic Type | Coordinates (Angstroms) |           |           |
|---------------|---------------|-------------|-------------------------|-----------|-----------|
|               |               |             | X                       | Y         | Z         |
| 1             | 6             | 0           | -2.193181               | 0.338838  | 0.343293  |
| 2             | 6             | 0           | -1.395573               | -0.400935 | -0.536006 |
| 3             | 6             | 0           | -1.657586               | -1.709823 | -0.894683 |
| 4             | 6             | 0           | -2.779745               | -2.306999 | -0.320770 |
| 5             | 6             | 0           | -3.596557               | -1.593950 | 0.557191  |
| 6             | 6             | 0           | -3.317268               | -0.271341 | 0.892246  |
| 7             | 6             | 0           | -1.687060               | 1.690738  | 0.568882  |
| 8             | 6             | 0           | -0.559529               | 1.996004  | -0.081569 |
| 9             | 1             | 0           | -1.023266               | -2.252810 | -1.586166 |
| 10            | 1             | 0           | -3.018525               | -3.335025 | -0.567462 |
| 11            | 1             | 0           | -4.466751               | -2.078025 | 0.985788  |
| 12            | 1             | 0           | -3.958383               | 0.278699  | 1.571955  |
| 13            | 1             | 0           | -2.180530               | 2.396690  | 1.228036  |
| 14            | 16            | 0           | -0.054100               | 0.609150  | -1.115944 |
| 15            | 6             | 0           | 1.430556                | -0.042332 | -0.225986 |
| 16            | 1             | 0           | 2.190793                | 0.714518  | -0.427015 |
| 17            | 1             | 0           | 1.684754                | -0.942477 | -0.788062 |
| 18            | 6             | 0           | 0.288525                | 3.216313  | -0.081476 |
| 19            | 1             | 0           | 0.371269                | 3.647416  | -1.082030 |
| 20            | 1             | 0           | -0.154755               | 3.956398  | 0.585587  |
| 21            | 1             | 0           | 1.298652                | 2.992446  | 0.274922  |
| 22            | 6             | 0           | 1.202678                | -0.291044 | 1.245628  |
| 23            | 1             | 0           | 2.139988                | -0.665848 | 1.663038  |
| 24            | 1             | 0           | 0.940333                | 0.623174  | 1.780240  |
| 25            | 1             | 0           | 0.432362                | -1.044643 | 1.416963  |
| 26            | 8             | 0           | 4.382162                | -0.829815 | 0.263441  |
| 27            | 1             | 0           | 3.944876                | -1.676354 | 0.412211  |
| 28            | 6             | 0           | 5.787533                | -1.040505 | 0.172886  |
| 29            | 1             | 0           | 6.248827                | -0.064948 | 0.022467  |
| 30            | 1             | 0           | 6.183105                | -1.480616 | 1.092326  |
| 31            | 1             | 0           | 6.038809                | -1.686260 | -0.673032 |

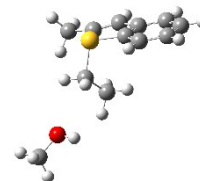

1b2-mbt CH<sub>3</sub>OH (in methanol)

Sum of electronic and zero-point Energies= -1018.900739 (Hartree/particle)  
 Sum of electronic and thermal Free Energies= -1018.947451 (Hartree/particle)  
 No imaginary frequencies

Standard orientation:

| Center Number | Atomic Number | Atomic Type | Coordinates (Angstroms) |           |           |
|---------------|---------------|-------------|-------------------------|-----------|-----------|
|               |               |             | X                       | Y         | Z         |
| 1             | 6             | 0           | -1.763454               | -0.939372 | 0.622670  |
| 2             | 6             | 0           | -1.243194               | 0.175265  | -0.045793 |
| 3             | 6             | 0           | -1.768173               | 0.672007  | -1.224304 |
| 4             | 6             | 0           | -2.876607               | 0.010301  | -1.751725 |
| 5             | 6             | 0           | -3.426593               | -1.093256 | -1.099751 |
| 6             | 6             | 0           | -2.879695               | -1.575755 | 0.086576  |
| 7             | 6             | 0           | -0.999575               | -1.293099 | 1.816344  |

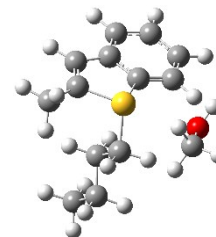



|    |    |   |           |           |           |
|----|----|---|-----------|-----------|-----------|
| 8  | 6  | 0 | 0.056480  | -0.511508 | 2.066950  |
| 9  | 1  | 0 | -1.332839 | 1.527455  | -1.724450 |
| 10 | 1  | 0 | -3.313352 | 0.363978  | -2.678499 |
| 11 | 1  | 0 | -4.292654 | -1.586817 | -1.526160 |
| 12 | 1  | 0 | -3.307526 | -2.437712 | 0.586321  |
| 13 | 1  | 0 | -1.258148 | -2.138343 | 2.444864  |
| 14 | 16 | 0 | 0.133068  | 0.831118  | 0.871510  |
| 15 | 6  | 0 | 1.608515  | 0.395735  | -0.147765 |
| 16 | 1  | 0 | 2.451642  | 0.706831  | 0.473859  |
| 17 | 1  | 0 | 1.525147  | 1.078056  | -0.995760 |
| 18 | 6  | 0 | 1.095739  | -0.565744 | 3.129030  |
| 19 | 1  | 0 | 1.101486  | 0.346065  | 3.731208  |
| 20 | 1  | 0 | 0.895911  | -1.415930 | 3.782011  |
| 21 | 1  | 0 | 2.093100  | -0.688335 | 2.695265  |
| 22 | 6  | 0 | 1.680258  | -1.061529 | -0.555330 |
| 23 | 1  | 0 | 1.723203  | -1.700530 | 0.331456  |
| 24 | 1  | 0 | 0.785659  | -1.338166 | -1.121922 |
| 25 | 8  | 0 | 0.189204  | 3.123878  | -0.875975 |
| 26 | 6  | 0 | 2.924477  | -1.298939 | -1.413616 |
| 27 | 1  | 0 | 3.815104  | -0.998296 | -0.852172 |
| 28 | 1  | 0 | 2.881629  | -0.662414 | -2.303193 |
| 29 | 6  | 0 | 3.044092  | -2.761176 | -1.827986 |
| 30 | 1  | 0 | 2.173923  | -3.077170 | -2.410220 |
| 31 | 1  | 0 | 3.933460  | -2.926428 | -2.440555 |
| 32 | 1  | 0 | 3.115464  | -3.413626 | -0.953183 |
| 33 | 1  | 0 | -0.658912 | 3.580840  | -0.824870 |
| 34 | 6  | 0 | 1.167305  | 3.889403  | -0.178928 |
| 35 | 1  | 0 | 2.114222  | 3.354150  | -0.256753 |
| 36 | 1  | 0 | 1.286952  | 4.878464  | -0.628766 |
| 37 | 1  | 0 | 0.906357  | 4.005021  | 0.876931  |

## Transition state methanolisys S<sub>N</sub>2

TS: 1,2,5-tmt CH<sub>3</sub>OH --> 2,5-dmt + CH<sub>3</sub>OHCH<sub>3</sub> (in methanol)

Sum of electronic and zero-point Energies= -786.738664 (Hartree/particle)

Sum of electronic and thermal Free Energies= -786.777881 (Hartree/particle)

1 imaginary frequency (589.2981i cm<sup>-1</sup>)

Standard orientation:

| Center<br>Number | Atomic<br>Number | Atomic<br>Type | Coordinates (Angstroms) |           |           |
|------------------|------------------|----------------|-------------------------|-----------|-----------|
|                  |                  |                | X                       | Y         | Z         |
| 1                | 6                | 0              | 1.409723                | 1.269678  | 0.005366  |
| 2                | 6                | 0              | 2.087293                | 0.720133  | 1.035638  |
| 3                | 6                | 0              | 2.076402                | -0.725631 | 1.050041  |
| 4                | 6                | 0              | 1.390181                | -1.285192 | 0.030936  |
| 5                | 16               | 0              | 0.738853                | -0.013120 | -1.004102 |
| 6                | 1                | 0              | 2.586174                | 1.319763  | 1.788186  |
| 7                | 1                | 0              | 2.567782                | -1.317596 | 1.813533  |
| 8                | 6                | 0              | -1.349489               | 0.020816  | -0.060469 |
| 9                | 1                | 0              | -1.610300               | -0.932465 | -0.498786 |
| 10               | 1                | 0              | -0.900175               | 0.060253  | 0.922641  |
| 11               | 1                | 0              | -1.610614               | 0.930668  | -0.583012 |
| 12               | 6                | 0              | 1.158904                | 2.700299  | -0.332191 |
| 13               | 1                | 0              | 0.089281                | 2.929770  | -0.319135 |
| 14               | 1                | 0              | 1.652763                | 3.336388  | 0.403739  |
| 15               | 1                | 0              | 1.543455                | 2.954875  | -1.322544 |
| 16               | 6                | 0              | 1.126841                | -2.718549 | -0.284548 |
| 17               | 1                | 0              | 1.604855                | -3.347050 | 0.468187  |

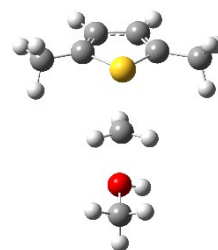

|    |   |   |           |           |           |
|----|---|---|-----------|-----------|-----------|
| 18 | 1 | 0 | 0.055036  | -2.936955 | -0.281813 |
| 19 | 1 | 0 | 1.521340  | -2.993780 | -1.265502 |
| 20 | 8 | 0 | -3.120902 | 0.024263  | 0.830702  |
| 21 | 1 | 0 | -3.189250 | 0.852108  | 1.326350  |
| 22 | 6 | 0 | -4.196572 | -0.068407 | -0.111234 |
| 23 | 1 | 0 | -4.100762 | -1.034020 | -0.604216 |
| 24 | 1 | 0 | -5.147756 | -0.020066 | 0.419157  |
| 25 | 1 | 0 | -4.135968 | 0.735049  | -0.848008 |

TS: 1,3-dmt CH<sub>3</sub>OH --> 3-mt + CH<sub>3</sub>OHCH<sub>3</sub> (in methanol)

Sum of electronic and zero-point Energies=-747.456906 (Hartree/particle)

Sum of electronic and thermal Free Energies=-747.495329 (Hartree/particle)

1 imaginary frequency (597.8013i cm<sup>-1</sup>)

Standard orientation:

| Center Number | Atomic Number | Atomic Type | Coordinates (Angstroms) |           |           |
|---------------|---------------|-------------|-------------------------|-----------|-----------|
|               |               |             | X                       | Y         | Z         |
| 1             | 6             | 0           | 1.427681                | 0.180615  | -1.044313 |
| 2             | 6             | 0           | 2.226603                | 0.513157  | -0.005883 |
| 3             | 6             | 0           | 2.009939                | -0.348728 | 1.145463  |
| 4             | 6             | 0           | 1.072379                | -1.294191 | 0.947411  |
| 5             | 16            | 0           | 0.416607                | -1.193549 | -0.669230 |
| 6             | 1             | 0           | 2.550024                | -0.232322 | 2.077849  |
| 7             | 6             | 0           | -1.494169               | -0.066018 | -0.103501 |
| 8             | 1             | 0           | -1.912868               | -0.933162 | 0.386926  |
| 9             | 1             | 0           | -0.912141               | 0.646594  | 0.464601  |
| 10            | 1             | 0           | -1.738968               | 0.130224  | -1.137887 |
| 11            | 8             | 0           | -3.127633               | 0.935128  | 0.467491  |
| 12            | 1             | 0           | -3.068381               | 1.823185  | 0.089731  |
| 13            | 6             | 0           | -4.328747               | 0.295235  | 0.019492  |
| 14            | 1             | 0           | -4.389561               | -0.659118 | 0.539324  |
| 15            | 1             | 0           | -5.189819               | 0.909477  | 0.283764  |
| 16            | 1             | 0           | -4.300480               | 0.132629  | -1.059764 |
| 17            | 1             | 0           | 1.361224                | 0.634860  | -2.023416 |
| 18            | 1             | 0           | 0.706630                | -2.052942 | 1.624983  |
| 19            | 6             | 0           | 3.220837                | 1.631037  | -0.006423 |
| 20            | 1             | 0           | 3.197847                | 2.181335  | -0.947121 |
| 21            | 1             | 0           | 3.013395                | 2.326022  | 0.811054  |
| 22            | 1             | 0           | 4.231334                | 1.242338  | 0.144234  |

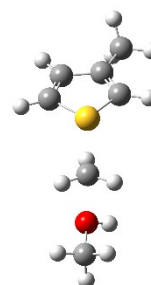

TS: 2e1-mt CH<sub>3</sub>OH --> 2-et + CH<sub>3</sub>OHCH<sub>3</sub> (in methanol)

Sum of electronic and zero-point Energies=-786.731455 (Hartree/particle)

Sum of electronic and thermal Free Energies=-786.771204 (Hartree/particle)

1 imaginary frequency (589.5102i cm<sup>-1</sup>)

Standard orientation:

| Center Number | Atomic Number | Atomic Type | Coordinates (Angstroms) |           |           |
|---------------|---------------|-------------|-------------------------|-----------|-----------|
|               |               |             | X                       | Y         | Z         |
| 1             | 6             | 0           | 1.472652                | 0.202843  | -0.160983 |
| 2             | 6             | 0           | 2.025117                | -0.486668 | 0.862208  |
| 3             | 6             | 0           | 1.580729                | -1.860248 | 0.954611  |
| 4             | 6             | 0           | 0.690029                | -2.200775 | 0.001870  |
| 5             | 16            | 0           | 0.381253                | -0.851528 | -1.063452 |
| 6             | 1             | 0           | 1.926846                | -2.548706 | 1.715607  |
| 7             | 6             | 0           | -1.537845               | -0.107533 | -0.071080 |
| 8             | 1             | 0           | -2.084323               | -0.988058 | -0.376568 |

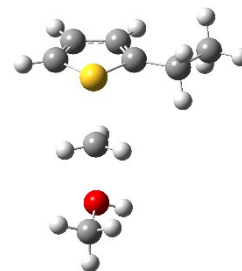

|    |   |   |           |           |           |
|----|---|---|-----------|-----------|-----------|
| 9  | 1 | 0 | -1.043011 | -0.087992 | 0.890560  |
| 10 | 1 | 0 | -1.562612 | 0.776954  | -0.692371 |
| 11 | 8 | 0 | -3.200491 | 0.499266  | 0.845263  |
| 12 | 1 | 0 | -3.023978 | 1.370943  | 1.225726  |
| 13 | 6 | 0 | -4.304060 | 0.580927  | -0.065530 |
| 14 | 1 | 0 | -4.472718 | -0.424352 | -0.447227 |
| 15 | 1 | 0 | -5.191283 | 0.923590  | 0.467485  |
| 16 | 1 | 0 | -4.075002 | 1.259156  | -0.889808 |
| 17 | 1 | 0 | 0.194857  | -3.145593 | -0.172722 |
| 18 | 1 | 0 | 2.730754  | -0.047938 | 1.556983  |
| 19 | 6 | 0 | 1.628367  | 1.633271  | -0.575995 |
| 20 | 1 | 0 | 1.961806  | 1.671796  | -1.617907 |
| 21 | 1 | 0 | 0.644908  | 2.117618  | -0.552660 |
| 22 | 6 | 0 | 2.602793  | 2.397532  | 0.312249  |
| 23 | 1 | 0 | 2.672612  | 3.434429  | -0.020994 |
| 24 | 1 | 0 | 2.274396  | 2.399884  | 1.354126  |
| 25 | 1 | 0 | 3.603931  | 1.962501  | 0.268809  |

TS: 1-mbt CH<sub>3</sub>OH --> bt + CH<sub>3</sub>OHCH<sub>3</sub> (in methanol)

Sum of electronic and zero-point Energies= -861.758173 (Hartree/particle)

Sum of electronic and thermal Free Energies= -861.796827 (Hartree/particle)

1 imaginary frequency (594.0098i cm<sup>-1</sup>)

Standard orientation:

| Center<br>Number | Atomic<br>Number | Atomic<br>Type | Coordinates (Angstroms) |           |           |
|------------------|------------------|----------------|-------------------------|-----------|-----------|
|                  |                  |                | X                       | Y         | Z         |
| 1                | 6                | 0              | -1.089294               | 0.051417  | -0.576176 |
| 2                | 6                | 0              | -1.543830               | 0.591165  | 0.636763  |
| 3                | 6                | 0              | -0.846605               | 1.816855  | 0.987585  |
| 4                | 6                | 0              | 0.085319                | 2.177351  | 0.090611  |
| 5                | 16               | 0              | 0.183052                | 1.057814  | -1.265495 |
| 6                | 1                | 0              | -1.059979               | 2.384475  | 1.885417  |
| 7                | 6                | 0              | 1.956702                | -0.202717 | -0.531043 |
| 8                | 1                | 0              | 2.665838                | 0.574753  | -0.779317 |
| 9                | 1                | 0              | 1.515966                | -0.246623 | 0.455621  |
| 10               | 6                | 0              | -1.596919               | -1.127340 | -1.109631 |
| 11               | 1                | 0              | -1.233723               | -1.527029 | -2.049943 |
| 12               | 6                | 0              | -2.597501               | -1.775772 | -0.395331 |
| 13               | 1                | 0              | -3.016066               | -2.697080 | -0.784408 |
| 14               | 6                | 0              | -2.555049               | -0.075589 | 1.335058  |
| 15               | 1                | 0              | -2.924563               | 0.327915  | 2.271643  |
| 16               | 6                | 0              | -3.072840               | -1.252552 | 0.813261  |
| 17               | 1                | 0              | -3.858281               | -1.775285 | 1.347611  |
| 18               | 1                | 0              | 3.958013                | -1.638402 | -0.565680 |
| 19               | 8                | 0              | 3.420791                | -1.329154 | 0.177123  |
| 20               | 1                | 0              | 1.741418                | -0.978232 | -1.252543 |
| 21               | 6                | 0              | 4.239950                | -0.610956 | 1.108216  |
| 22               | 1                | 0              | 3.576620                | -0.229420 | 1.882638  |
| 23               | 1                | 0              | 4.967800                | -1.291293 | 1.550865  |
| 24               | 1                | 0              | 4.751031                | 0.216514  | 0.613196  |
| 25               | 1                | 0              | 0.741171                | 3.036757  | 0.099960  |

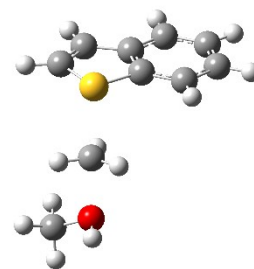

TS: 1,2-dmbt CH<sub>3</sub>OH --> 2-mbt + CH<sub>3</sub>OHCH<sub>3</sub> (in methanol)

Sum of electronic and zero-point Energies= -901.040141 (Hartree/particle)

Sum of electronic and thermal Free Energies= -901.081543 (Hartree/particle)

1 imaginary frequency (598.4449i cm<sup>-1</sup>)

Standard orientation:

| Center Number | Atomic Number | Atomic Type | Coordinates (Angstroms) |           |           |
|---------------|---------------|-------------|-------------------------|-----------|-----------|
|               |               |             | X                       | Y         | Z         |
| 1             | 6             | 0           | -1.219831               | -0.103148 | -0.582154 |
| 2             | 6             | 0           | -1.571324               | 0.519555  | 0.625303  |
| 3             | 6             | 0           | -0.708068               | 1.645067  | 0.937593  |
| 4             | 6             | 0           | 0.253844                | 1.877466  | 0.027009  |
| 5             | 16            | 0           | 0.160023                | 0.709847  | -1.313052 |
| 6             | 1             | 0           | -0.819630               | 2.245516  | 1.833543  |
| 7             | 6             | 0           | 1.796852                | -0.704870 | -0.533497 |
| 8             | 1             | 0           | 2.577640                | -0.039645 | -0.875215 |
| 9             | 1             | 0           | 1.393177                | -0.612643 | 0.465886  |
| 10            | 6             | 0           | -1.893726               | -1.210320 | -1.081935 |
| 11            | 1             | 0           | -1.604711               | -1.672649 | -2.019484 |
| 12            | 6             | 0           | -2.958634               | -1.704312 | -0.336704 |
| 13            | 1             | 0           | -3.506208               | -2.567688 | -0.697389 |
| 14            | 6             | 0           | -2.648358               | 0.008521  | 1.354818  |
| 15            | 1             | 0           | -2.941104               | 0.475864  | 2.288966  |
| 16            | 6             | 0           | -3.330964               | -1.098340 | 0.868536  |
| 17            | 1             | 0           | -4.167139               | -1.500476 | 1.429659  |
| 18            | 6             | 0           | 1.342839                | 2.894295  | 0.021137  |
| 19            | 1             | 0           | 1.330316                | 3.493204  | -0.892277 |
| 20            | 1             | 0           | 1.221055                | 3.561803  | 0.875075  |
| 21            | 1             | 0           | 2.325218                | 2.417856  | 0.096591  |
| 22            | 1             | 0           | 3.664296                | -2.279869 | -0.536561 |
| 23            | 8             | 0           | 3.155787                | -1.923833 | 0.205605  |
| 24            | 1             | 0           | 1.458676                | -1.503005 | -1.179256 |
| 25            | 6             | 0           | 4.029904                | -1.247418 | 1.118361  |
| 26            | 1             | 0           | 3.405155                | -0.848094 | 1.915270  |
| 27            | 1             | 0           | 4.742760                | -1.960337 | 1.533032  |
| 28            | 1             | 0           | 4.558631                | -0.435691 | 0.615361  |

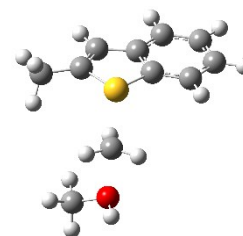

TS: 1e2-mbt CH<sub>3</sub>OH --> 2-mbt + CH<sub>3</sub>CH<sub>2</sub>OHCH<sub>3</sub> (in methanol)

Sum of electronic and zero-point Energies= -940.319478 (Hartree/particle)

Sum of electronic and thermal Free Energies= -940.362521 (Hartree/particle)

1 imaginary frequency (542.4199i cm<sup>-1</sup>)

Standard orientation:

| Center Number | Atomic Number | Atomic Type | Coordinates (Angstroms) |           |           |
|---------------|---------------|-------------|-------------------------|-----------|-----------|
|               |               |             | X                       | Y         | Z         |
| 1             | 6             | 0           | -1.378571               | -0.066491 | -0.522731 |
| 2             | 6             | 0           | -1.590224               | 0.758649  | 0.594287  |
| 3             | 6             | 0           | -0.625170               | 1.839956  | 0.668228  |
| 4             | 6             | 0           | 0.274980                | 1.848545  | -0.332924 |
| 5             | 16            | 0           | 0.003947                | 0.493882  | -1.451301 |
| 6             | 1             | 0           | -0.622622               | 2.579463  | 1.461473  |
| 7             | 6             | 0           | 1.675790                | -0.856787 | -0.360355 |
| 8             | 1             | 0           | 2.416927                | -0.206654 | -0.805489 |
| 9             | 1             | 0           | 1.201602                | -0.541448 | 0.560258  |
| 10            | 6             | 0           | -2.181496               | -1.165550 | -0.806601 |
| 11            | 1             | 0           | -2.006458               | -1.779517 | -1.683069 |
| 12            | 6             | 0           | -3.224142               | -1.445458 | 0.069061  |
| 13            | 1             | 0           | -3.868699               | -2.295373 | -0.124876 |
| 14            | 6             | 0           | -2.648782               | 0.460308  | 1.457949  |
| 15            | 1             | 0           | -2.835083               | 1.085604  | 2.324644  |
| 16            | 6             | 0           | -3.453481               | -0.638794 | 1.189823  |
| 17            | 1             | 0           | -4.276196               | -0.874496 | 1.855761  |
| 18            | 6             | 0           | 1.426168                | 2.763499  | -0.576811 |
| 19            | 1             | 0           | 1.343018                | 3.259845  | -1.546705 |

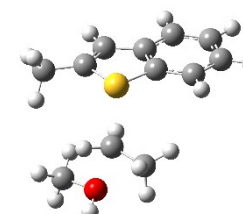

|    |   |   |          |           |           |
|----|---|---|----------|-----------|-----------|
| 20 | 1 | 0 | 1.456050 | 3.526133  | 0.202510  |
| 21 | 1 | 0 | 2.374048 | 2.216764  | -0.560558 |
| 22 | 6 | 0 | 1.350141 | -2.174642 | -0.973534 |
| 23 | 1 | 0 | 0.330407 | -2.481246 | -0.738961 |
| 24 | 1 | 0 | 1.504380 | -2.162341 | -2.051981 |
| 25 | 1 | 0 | 2.016217 | -2.933714 | -0.554211 |
| 26 | 1 | 0 | 3.880154 | -1.872523 | 0.396527  |
| 27 | 8 | 0 | 3.182420 | -1.444174 | 0.911914  |
| 28 | 6 | 0 | 3.716580 | -0.296728 | 1.580311  |
| 29 | 1 | 0 | 2.884156 | 0.194842  | 2.082606  |
| 30 | 1 | 0 | 4.452358 | -0.612776 | 2.320676  |
| 31 | 1 | 0 | 4.176462 | 0.389676  | 0.866683  |

TS: 1b2-mbt CH<sub>3</sub>OH --> 2-mbt + CH<sub>3</sub>CH<sub>2</sub>CH<sub>2</sub>CH<sub>2</sub>OHCH<sub>3</sub> (in methanol)

Sum of electronic and zero-point Energies= -1018.869183 (Hartree/particle)

Sum of electronic and thermal Free Energies= -1018.915097 (Hartree/particle)

1 imaginary frequency (495.9264i cm<sup>-1</sup>)

Standard orientation:

| Center<br>Number | Atomic<br>Number | Atomic<br>Type | Coordinates (Angstroms) |           |           |
|------------------|------------------|----------------|-------------------------|-----------|-----------|
|                  |                  |                | X                       | Y         | Z         |
| 1                | 6                | 0              | 1.421991                | 0.369334  | 0.755480  |
| 2                | 6                | 0              | 1.932470                | 0.817960  | -0.474921 |
| 3                | 6                | 0              | 1.086940                | 1.825416  | -1.087574 |
| 4                | 6                | 0              | -0.016348               | 2.127536  | -0.378685 |
| 5                | 16               | 0              | -0.081902               | 1.194107  | 1.134521  |
| 6                | 1                | 0              | 1.317742                | 2.296715  | -2.036245 |
| 7                | 6                | 0              | -1.893587               | -0.366777 | 0.617462  |
| 8                | 1                | 0              | -2.292541               | -0.195889 | 1.609058  |
| 9                | 1                | 0              | -2.159729               | 0.335532  | -0.161140 |
| 10               | 6                | 0              | 2.066120                | -0.591393 | 1.526864  |
| 11               | 1                | 0              | 1.662646                | -0.913864 | 2.480412  |
| 12               | 6                | 0              | 3.254137                | -1.124122 | 1.036830  |
| 13               | 1                | 0              | 3.778050                | -1.876771 | 1.614939  |
| 14               | 6                | 0              | 3.125878                | 0.266459  | -0.948030 |
| 15               | 1                | 0              | 3.537560                | 0.597135  | -1.895489 |
| 16               | 6                | 0              | 3.775494                | -0.700136 | -0.190033 |
| 17               | 1                | 0              | 4.702094                | -1.130811 | -0.552759 |
| 18               | 6                | 0              | -1.102694               | 3.104423  | -0.674536 |
| 19               | 1                | 0              | -1.143526               | 3.889624  | 0.084433  |
| 20               | 1                | 0              | -0.918045               | 3.569650  | -1.643534 |
| 21               | 1                | 0              | -2.084211               | 2.623090  | -0.706274 |
| 22               | 6                | 0              | -1.113823               | -1.592776 | 0.305630  |
| 23               | 1                | 0              | -0.293281               | -1.697237 | 1.022731  |
| 24               | 1                | 0              | -1.765042               | -2.447804 | 0.520070  |
| 25               | 1                | 0              | -4.068808               | -1.714940 | 0.868732  |
| 26               | 8                | 0              | -3.792979               | -1.174152 | 0.115928  |
| 27               | 6                | 0              | -4.740238               | -0.123724 | -0.095437 |
| 28               | 1                | 0              | -4.451533               | 0.384167  | -1.014337 |
| 29               | 1                | 0              | -5.741316               | -0.540561 | -0.212853 |
| 30               | 1                | 0              | -4.729585               | 0.584442  | 0.736544  |
| 31               | 6                | 0              | -0.606360               | -1.632941 | -1.133075 |
| 32               | 1                | 0              | -0.182559               | -0.659730 | -1.398682 |
| 33               | 1                | 0              | -1.456814               | -1.792515 | -1.803554 |
| 34               | 6                | 0              | 0.442987                | -2.717789 | -1.333688 |
| 35               | 1                | 0              | 0.047616                | -3.704096 | -1.073873 |
| 36               | 1                | 0              | 0.779531                | -2.755720 | -2.372119 |
| 37               | 1                | 0              | 1.318206                | -2.531753 | -0.703552 |

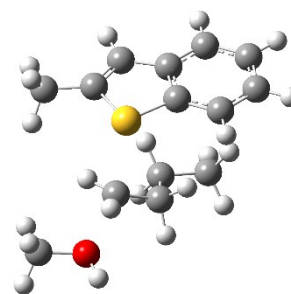

# Methanolisys S<sub>N</sub>3

## Thiophenium cations + nucleophile

1,2,5-tmt 2CH<sub>3</sub>OH (in methanol)

Sum of electronic and zero-point Energies= -902.427796 (Hartree/particle)

Sum of electronic and thermal Free Energies= -902.469732 (Hartree/particle)

No imaginary frequencies

Standard orientation:

| Center Number | Atomic Number | Atomic Type | Coordinates (Angstroms) |           |           |
|---------------|---------------|-------------|-------------------------|-----------|-----------|
|               |               |             | X                       | Y         | Z         |
| 1             | 6             | 0           | 1.068052                | 1.371693  | -0.576331 |
| 2             | 6             | 0           | 1.581240                | 1.455957  | 0.659100  |
| 3             | 6             | 0           | 2.162789                | 0.220507  | 1.176865  |
| 4             | 6             | 0           | 2.103719                | -0.829893 | 0.348247  |
| 5             | 16            | 0           | 1.387480                | -0.276974 | -1.198449 |
| 6             | 1             | 0           | 1.555401                | 2.376208  | 1.231345  |
| 7             | 1             | 0           | 2.590563                | 0.146683  | 2.170133  |
| 8             | 6             | 0           | -0.264022               | -1.040191 | -1.173393 |
| 9             | 1             | 0           | -0.127845               | -2.099779 | -1.387693 |
| 10            | 1             | 0           | -0.703931               | -0.879127 | -0.192159 |
| 11            | 1             | 0           | -0.838825               | -0.568834 | -1.969579 |
| 12            | 6             | 0           | 0.393656                | 2.367258  | -1.451849 |
| 13            | 1             | 0           | -0.587977               | 2.012529  | -1.778953 |
| 14            | 1             | 0           | 0.257532                | 3.293626  | -0.892530 |
| 15            | 1             | 0           | 0.988003                | 2.582057  | -2.343300 |
| 16            | 6             | 0           | 2.522098                | -2.248514 | 0.496141  |
| 17            | 1             | 0           | 2.961422                | -2.384453 | 1.485117  |
| 18            | 1             | 0           | 1.666917                | -2.923898 | 0.402769  |
| 19            | 1             | 0           | 3.261522                | -2.529520 | -0.257299 |
| 20            | 8             | 0           | -3.279946               | -1.200570 | 0.126894  |
| 21            | 1             | 0           | -2.845134               | -0.528740 | 0.681806  |
| 22            | 8             | 0           | -1.936106               | 0.904758  | 1.335611  |
| 23            | 1             | 0           | -1.369191               | 1.301733  | 0.662829  |
| 24            | 6             | 0           | -3.844338               | -0.526242 | -0.987737 |
| 25            | 1             | 0           | -4.218510               | -1.279519 | -1.681453 |
| 26            | 1             | 0           | -4.677935               | 0.115901  | -0.685363 |
| 27            | 1             | 0           | -3.099885               | 0.087465  | -1.505949 |
| 28            | 6             | 0           | -1.132678               | 0.426444  | 2.413516  |
| 29            | 1             | 0           | -0.516399               | 1.226490  | 2.830523  |
| 30            | 1             | 0           | -1.817528               | 0.068921  | 3.181906  |
| 31            | 1             | 0           | -0.492558               | -0.401786 | 2.095642  |

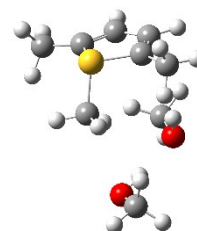

1,3-dmt 2CH<sub>3</sub>OH (in methanol)

Sum of electronic and zero-point Energies= -863.143794 (Hartree/particle)

Sum of electronic and thermal Free Energies= -863.187222 (Hartree/particle)

No imaginary frequencies

Standard orientation:

| Center Number | Atomic Number | Atomic Type | Coordinates (Angstroms) |   |   |
|---------------|---------------|-------------|-------------------------|---|---|
|               |               |             | X                       | Y | Z |

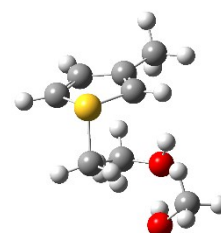

|    |    |   |           |           |           |
|----|----|---|-----------|-----------|-----------|
| 1  | 6  | 0 | 0.961742  | -0.301148 | -1.171906 |
| 2  | 6  | 0 | 1.617498  | 0.748665  | -0.648674 |
| 3  | 6  | 0 | 2.218394  | 0.450669  | 0.661128  |
| 4  | 6  | 0 | 2.025239  | -0.798797 | 1.088954  |
| 5  | 16 | 0 | 1.185012  | -1.732630 | -0.159678 |
| 6  | 1  | 0 | 2.761059  | 1.197808  | 1.229026  |
| 7  | 6  | 0 | -0.454206 | -2.057295 | 0.563270  |
| 8  | 1  | 0 | -0.290756 | -2.731414 | 1.403055  |
| 9  | 1  | 0 | -0.896815 | -1.115173 | 0.877163  |
| 10 | 1  | 0 | -1.043163 | -2.550776 | -0.208348 |
| 11 | 8  | 0 | -3.266899 | -0.288859 | 0.296832  |
| 12 | 1  | 0 | -2.806030 | 0.549524  | 0.475338  |
| 13 | 8  | 0 | -1.528437 | 1.862339  | 0.293773  |
| 14 | 1  | 0 | -0.983919 | 1.512699  | -0.422889 |
| 15 | 6  | 0 | -3.089776 | -0.575965 | -1.082067 |
| 16 | 1  | 0 | -3.512779 | -1.562102 | -1.275306 |
| 17 | 1  | 0 | -3.605589 | 0.157382  | -1.710319 |
| 18 | 1  | 0 | -2.029600 | -0.587973 | -1.359168 |
| 19 | 6  | 0 | -0.769999 | 1.912708  | 1.501320  |
| 20 | 1  | 0 | 0.132439  | 2.516599  | 1.377273  |
| 21 | 1  | 0 | -1.406632 | 2.379428  | 2.252277  |
| 22 | 1  | 0 | -0.494010 | 0.911931  | 1.844323  |
| 23 | 1  | 0 | 2.344177  | -1.299865 | 1.992233  |
| 24 | 1  | 0 | 0.456567  | -0.405730 | -2.122233 |
| 25 | 6  | 0 | 1.733676  | 2.093878  | -1.282353 |
| 26 | 1  | 0 | 1.361971  | 2.862972  | -0.599850 |
| 27 | 1  | 0 | 2.784526  | 2.318783  | -1.483761 |
| 28 | 1  | 0 | 1.175655  | 2.143856  | -2.216844 |

2e1-mt 2CH<sub>3</sub>OH (in methanol)

Sum of electronic and zero-point Energies= -902.416479 (Hartree/particle)

Sum of electronic and thermal Free Energies= -902.463408 (Hartree/particle)

No imaginary frequencies

Standard orientation:

| Center Number | Atomic Number | Atomic Type | Coordinates (Angstroms) |           |           |
|---------------|---------------|-------------|-------------------------|-----------|-----------|
|               |               |             | X                       | Y         | Z         |
| 1             | 6             | 0           | 1.847115                | -0.251291 | -0.053695 |
| 2             | 6             | 0           | 2.017116                | 0.847076  | 0.695922  |
| 3             | 6             | 0           | 1.401676                | 2.058365  | 0.158171  |
| 4             | 6             | 0           | 0.745306                | 1.881430  | -0.993675 |
| 5             | 16            | 0           | 0.970021                | 0.217465  | -1.547113 |
| 6             | 1             | 0           | 2.552318                | 0.836735  | 1.637613  |
| 7             | 1             | 0           | 1.461487                | 3.016906  | 0.659218  |
| 8             | 1             | 0           | 0.218423                | 2.581765  | -1.626041 |
| 9             | 6             | 0           | 2.250569                | -1.676305 | 0.132247  |
| 10            | 1             | 0           | 1.349770                | -2.300940 | 0.122116  |
| 11            | 1             | 0           | 2.855924                | -1.992123 | -0.723275 |
| 12            | 6             | 0           | 3.018255                | -1.886673 | 1.431750  |
| 13            | 1             | 0           | 3.289158                | -2.938701 | 1.531777  |
| 14            | 1             | 0           | 3.937443                | -1.296980 | 1.448569  |
| 15            | 1             | 0           | 2.414279                | -1.609756 | 2.298648  |
| 16            | 6             | 0           | -0.650533               | -0.579569 | -1.296691 |
| 17            | 1             | 0           | -1.322683               | -0.164131 | -2.046172 |
| 18            | 1             | 0           | -0.493521               | -1.642030 | -1.479299 |
| 19            | 1             | 0           | -0.974702               | -0.377063 | -0.278233 |
| 20            | 8             | 0           | -1.366044               | 0.743835  | 1.518385  |
| 21            | 1             | 0           | -1.354394               | 0.765163  | 2.482282  |

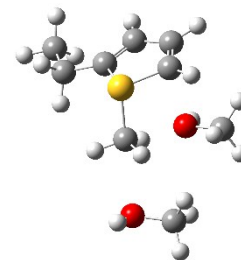

|    |   |   |           |           |           |
|----|---|---|-----------|-----------|-----------|
| 22 | 6 | 0 | -2.011597 | 1.914440  | 1.031814  |
| 23 | 1 | 0 | -1.483105 | 2.819647  | 1.345038  |
| 24 | 1 | 0 | -2.000534 | 1.863107  | -0.057702 |
| 25 | 1 | 0 | -3.048652 | 1.968969  | 1.375280  |
| 26 | 8 | 0 | -3.100458 | -1.993831 | 0.012521  |
| 27 | 1 | 0 | -3.013174 | -2.324155 | -0.888970 |
| 28 | 6 | 0 | -3.915851 | -0.827581 | 0.002970  |
| 29 | 1 | 0 | -4.903955 | -1.038853 | -0.415792 |
| 30 | 1 | 0 | -4.032663 | -0.507678 | 1.037832  |
| 31 | 1 | 0 | -3.452082 | -0.018701 | -0.569208 |

1-mbt 2CH<sub>3</sub>OH (in methanol)

Sum of electronic and zero-point Energies= -977.446012 (Hartree/particle)

Sum of electronic and thermal Free Energies= -977.493711 (Hartree/particle)

No imaginary frequencies

Standard orientation:

| Center<br>Number | Atomic<br>Number | Atomic<br>Type | Coordinates (Angstroms) |           |           |
|------------------|------------------|----------------|-------------------------|-----------|-----------|
|                  |                  |                | X                       | Y         | Z         |
| 1                | 6                | 0              | -1.715482               | -0.274011 | -0.373634 |
| 2                | 6                | 0              | -2.621311               | 0.657750  | 0.144001  |
| 3                | 6                | 0              | -2.214991               | 2.039341  | -0.109934 |
| 4                | 6                | 0              | -1.063643               | 2.164698  | -0.773267 |
| 5                | 16               | 0              | -0.392179               | 0.571731  | -1.211153 |
| 6                | 1                | 0              | -2.797862               | 2.891913  | 0.218829  |
| 7                | 6                | 0              | 0.993399                | 0.384173  | -0.037716 |
| 8                | 1                | 0              | 1.792014                | 1.035556  | -0.390583 |
| 9                | 1                | 0              | 0.640337                | 0.667640  | 0.951007  |
| 10               | 6                | 0              | -1.869969               | -1.642195 | -0.257266 |
| 11               | 1                | 0              | -1.155209               | -2.340353 | -0.678279 |
| 12               | 6                | 0              | -2.996752               | -2.089000 | 0.432293  |
| 13               | 1                | 0              | -3.156782               | -3.154123 | 0.552729  |
| 14               | 6                | 0              | -3.744661               | 0.189956  | 0.818926  |
| 15               | 1                | 0              | -4.466082               | 0.889348  | 1.226292  |
| 16               | 6                | 0              | -3.919399               | -1.184256 | 0.959032  |
| 17               | 1                | 0              | -4.790439               | -1.558897 | 1.484489  |
| 18               | 1                | 0              | 3.284394                | -0.626689 | 1.171776  |
| 19               | 8                | 0              | 3.224181                | 0.018377  | 1.898262  |
| 20               | 1                | 0              | 1.294964                | -0.661369 | -0.081567 |
| 21               | 6                | 0              | 4.133523                | 1.071620  | 1.617290  |
| 22               | 1                | 0              | 4.174035                | 1.719354  | 2.493600  |
| 23               | 1                | 0              | 5.139889                | 0.688687  | 1.421082  |
| 24               | 1                | 0              | 3.807151                | 1.670051  | 0.759668  |
| 25               | 1                | 0              | -0.530931               | 3.047681  | -1.097712 |
| 26               | 8                | 0              | 3.712660                | -1.518217 | -0.336865 |
| 27               | 1                | 0              | 3.471786                | -2.440113 | -0.484167 |
| 28               | 6                | 0              | 3.789806                | -0.828999 | -1.581587 |
| 29               | 1                | 0              | 2.836115                | -0.861394 | -2.115660 |
| 30               | 1                | 0              | 4.043104                | 0.207110  | -1.358561 |
| 31               | 1                | 0              | 4.570532                | -1.257826 | -2.214505 |

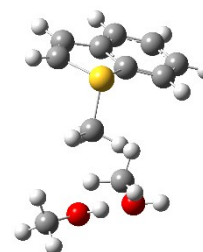

1,2-dmbt 2CH<sub>3</sub>OH (in methanol)

Sum of electronic and zero-point Energies= -1016.731059 (Hartree/particle)

Sum of electronic and thermal Free Energies= -1016.780349 (Hartree/particle)

No imaginary frequencies

Standard orientation:



| Center Number | Atomic Number | Atomic Type | Coordinates (Angstroms) |           |           |
|---------------|---------------|-------------|-------------------------|-----------|-----------|
|               |               |             | X                       | Y         | Z         |
| 1             | 6             | 0           | 1.842578                | 0.281793  | 0.374248  |
| 2             | 6             | 0           | 1.198078                | 0.090456  | -0.852033 |
| 3             | 6             | 0           | 1.436069                | -0.984379 | -1.688029 |
| 4             | 6             | 0           | 2.356824                | -1.933420 | -1.244949 |
| 5             | 6             | 0           | 3.010596                | -1.775237 | -0.022507 |
| 6             | 6             | 0           | 2.765678                | -0.672279 | 0.792269  |
| 7             | 6             | 0           | 1.401886                | 1.490584  | 1.065757  |
| 8             | 6             | 0           | 0.465427                | 2.204988  | 0.433947  |
| 9             | 1             | 0           | 0.929438                | -1.095014 | -2.639883 |
| 10            | 1             | 0           | 2.567289                | -2.798298 | -1.862947 |
| 11            | 1             | 0           | 3.724825                | -2.524816 | 0.298805  |
| 12            | 1             | 0           | 3.280773                | -0.554491 | 1.739033  |
| 13            | 1             | 0           | 1.788216                | 1.780765  | 2.036607  |
| 14            | 16            | 0           | 0.091103                | 1.446204  | -1.161352 |
| 15            | 6             | 0           | -1.553035               | 0.720157  | -0.855227 |
| 16            | 1             | 0           | -1.533473               | 0.232510  | 0.117763  |
| 17            | 1             | 0           | -1.741643               | 0.026148  | -1.672945 |
| 18            | 1             | 0           | -2.264048               | 1.544376  | -0.889421 |
| 19            | 8             | 0           | -0.753129               | -0.886392 | 1.955352  |
| 20            | 1             | 0           | -0.832796               | -1.019477 | 2.907347  |
| 21            | 6             | 0           | -0.503892               | -2.138665 | 1.327020  |
| 22            | 1             | 0           | -1.306536               | -2.853536 | 1.532012  |
| 23            | 1             | 0           | -0.457507               | -1.959387 | 0.252534  |
| 24            | 1             | 0           | 0.446537                | -2.566777 | 1.657866  |
| 25            | 6             | 0           | -0.273144               | 3.437829  | 0.811375  |
| 26            | 1             | 0           | -1.348508               | 3.246904  | 0.870223  |
| 27            | 1             | 0           | 0.071321                | 3.772415  | 1.790353  |
| 28            | 1             | 0           | -0.109473               | 4.240310  | 0.088540  |
| 29            | 6             | 0           | -3.653057               | -1.603972 | 0.075518  |
| 30            | 1             | 0           | -3.177842               | -1.266709 | 0.995541  |
| 31            | 1             | 0           | -2.890993               | -2.010896 | -0.595683 |
| 32            | 1             | 0           | -4.371367               | -2.392625 | 0.316891  |
| 33            | 8             | 0           | -4.300908               | -0.475530 | -0.500984 |
| 34            | 1             | 0           | -4.763615               | -0.752395 | -1.300295 |

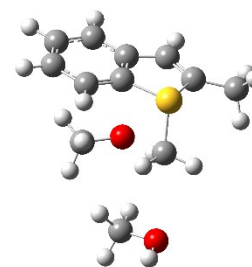

1e2-mbt 2CH<sub>3</sub>OH (in methanol)

Sum of electronic and zero-point Energies= -1056.006147 (Hartree/particle)

Sum of electronic and thermal Free Energies= -1056.056026 (Hartree/particle)

No imaginary frequencies

Standard orientation:

| Center Number | Atomic Number | Atomic Type | Coordinates (Angstroms) |           |           |
|---------------|---------------|-------------|-------------------------|-----------|-----------|
|               |               |             | X                       | Y         | Z         |
| 1             | 6             | 0           | 1.989210                | 0.153390  | 0.075548  |
| 2             | 6             | 0           | 1.051933                | -0.019781 | -0.947213 |
| 3             | 6             | 0           | 0.969730                | -1.155618 | -1.731057 |
| 4             | 6             | 0           | 1.882536                | -2.174971 | -1.458840 |
| 5             | 6             | 0           | 2.832923                | -2.029888 | -0.447250 |
| 6             | 6             | 0           | 2.897129                | -0.871895 | 0.323925  |
| 7             | 6             | 0           | 1.839131                | 1.429396  | 0.767623  |
| 8             | 6             | 0           | 0.838571                | 2.206697  | 0.337777  |
| 9             | 1             | 0           | 0.233922                | -1.255473 | -2.521220 |
| 10            | 1             | 0           | 1.852921                | -3.085236 | -2.046174 |
| 11            | 1             | 0           | 3.534842                | -2.834232 | -0.258362 |

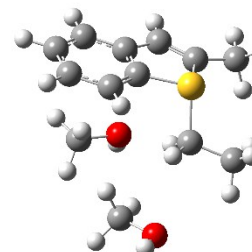

|    |    |   |           |           |           |
|----|----|---|-----------|-----------|-----------|
| 12 | 1  | 0 | 3.636327  | -0.766106 | 1.110251  |
| 13 | 1  | 0 | 2.484163  | 1.727360  | 1.586963  |
| 14 | 16 | 0 | 0.033269  | 1.430698  | -1.079493 |
| 15 | 6  | 0 | -1.583161 | 0.807997  | -0.432186 |
| 16 | 1  | 0 | -1.369402 | 0.436498  | 0.570579  |
| 17 | 1  | 0 | -1.805994 | -0.023561 | -1.103037 |
| 18 | 8  | 0 | -0.338891 | -0.643951 | 2.301320  |
| 19 | 1  | 0 | -0.509578 | -0.594658 | 3.249060  |
| 20 | 6  | 0 | 0.009293  | -1.981573 | 1.961017  |
| 21 | 1  | 0 | -0.785147 | -2.682102 | 2.236530  |
| 22 | 1  | 0 | 0.150455  | -2.016321 | 0.880872  |
| 23 | 1  | 0 | 0.938640  | -2.285376 | 2.451445  |
| 24 | 6  | 0 | 0.372522  | 3.541687  | 0.802079  |
| 25 | 1  | 0 | -0.590111 | 3.467062  | 1.313709  |
| 26 | 1  | 0 | 1.102821  | 3.941850  | 1.506663  |
| 27 | 1  | 0 | 0.264901  | 4.243787  | -0.027479 |
| 28 | 6  | 0 | -2.914704 | -2.103586 | 0.337343  |
| 29 | 1  | 0 | -2.682244 | -1.431910 | 1.163104  |
| 30 | 1  | 0 | -2.002932 | -2.301385 | -0.235034 |
| 31 | 1  | 0 | -3.290095 | -3.046601 | 0.745230  |
| 32 | 8  | 0 | -3.899453 | -1.458331 | -0.462490 |
| 33 | 1  | 0 | -4.180356 | -2.058600 | -1.162374 |
| 34 | 6  | 0 | -2.650144 | 1.880620  | -0.489991 |
| 35 | 1  | 0 | -3.585473 | 1.427662  | -0.152752 |
| 36 | 1  | 0 | -2.432727 | 2.722149  | 0.167362  |
| 37 | 1  | 0 | -2.800290 | 2.247430  | -1.506749 |

1b2-mbt 2CH<sub>3</sub>OH (in methanol)

Sum of electronic and zero-point Energies= -1134.555205 (Hartree/particle)  
 Sum of electronic and thermal Free Energies= -1134.609199 (Hartree/particle)  
 No imaginary frequencies

Standard orientation:

| Center<br>Number | Atomic<br>Number | Atomic<br>Type | Coordinates (Angstroms) |           |           |
|------------------|------------------|----------------|-------------------------|-----------|-----------|
|                  |                  |                | X                       | Y         | Z         |
| 1                | 6                | 0              | 2.244830                | 0.972706  | -0.028459 |
| 2                | 6                | 0              | 1.409643                | 0.320344  | -0.940756 |
| 3                | 6                | 0              | 1.772352                | -0.818538 | -1.635822 |
| 4                | 6                | 0              | 3.045764                | -1.330084 | -1.385062 |
| 5                | 6                | 0              | 3.905477                | -0.695830 | -0.487213 |
| 6                | 6                | 0              | 3.517360                | 0.454426  | 0.195262  |
| 7                | 6                | 0              | 1.611136                | 2.134796  | 0.585160  |
| 8                | 6                | 0              | 0.356447                | 2.384938  | 0.193438  |
| 9                | 1                | 0              | 1.105312                | -1.293639 | -2.346400 |
| 10               | 1                | 0              | 3.369132                | -2.224860 | -1.904067 |
| 11               | 1                | 0              | 4.893770                | -1.108168 | -0.317297 |
| 12               | 1                | 0              | 4.188364                | 0.940108  | 0.895104  |
| 13               | 1                | 0              | 2.113303                | 2.750370  | 1.323561  |
| 14               | 16               | 0              | -0.112508               | 1.223716  | -1.106946 |
| 15               | 6                | 0              | -1.370411               | 0.105201  | -0.355858 |
| 16               | 1                | 0              | -1.035476               | -0.083512 | 0.665408  |
| 17               | 1                | 0              | -1.279983               | -0.805787 | -0.953505 |
| 18               | 8                | 0              | 0.488641                | -0.525875 | 2.283958  |
| 19               | 1                | 0              | 0.186697                | -0.399679 | 3.191119  |
| 20               | 6                | 0              | 1.484883                | -1.541786 | 2.263120  |
| 21               | 1                | 0              | 1.096322                | -2.489565 | 2.648296  |
| 22               | 1                | 0              | 1.788752                | -1.680190 | 1.226039  |
| 23               | 1                | 0              | 2.360792                | -1.250373 | 2.850458  |

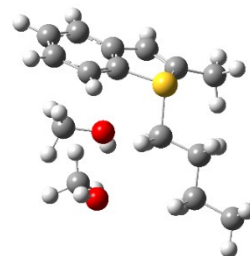

|    |   |   |           |           |           |
|----|---|---|-----------|-----------|-----------|
| 24 | 6 | 0 | -0.603450 | 3.439790  | 0.618982  |
| 25 | 1 | 0 | -1.399339 | 3.018692  | 1.238552  |
| 26 | 1 | 0 | -0.067451 | 4.182596  | 1.211478  |
| 27 | 1 | 0 | -1.063163 | 3.940663  | -0.235459 |
| 28 | 6 | 0 | -0.783455 | -3.104369 | 0.403182  |
| 29 | 1 | 0 | -1.197827 | -2.501038 | 1.210797  |
| 30 | 1 | 0 | 0.075439  | -2.583020 | -0.029537 |
| 31 | 1 | 0 | -0.452713 | -4.064844 | 0.808627  |
| 32 | 8 | 0 | -1.815875 | -3.282277 | -0.561237 |
| 33 | 1 | 0 | -1.494051 | -3.858578 | -1.263812 |
| 34 | 6 | 0 | -2.761543 | 0.707043  | -0.465740 |
| 35 | 1 | 0 | -2.821458 | 1.649282  | 0.084986  |
| 36 | 1 | 0 | -2.993649 | 0.921202  | -1.513729 |
| 37 | 6 | 0 | -3.789477 | -0.276603 | 0.096711  |
| 38 | 1 | 0 | -3.732822 | -1.216047 | -0.461563 |
| 39 | 1 | 0 | -3.538056 | -0.510119 | 1.136704  |
| 40 | 6 | 0 | -5.203081 | 0.288957  | 0.020330  |
| 41 | 1 | 0 | -5.481656 | 0.511338  | -1.013670 |
| 42 | 1 | 0 | -5.933019 | -0.420092 | 0.417883  |
| 43 | 1 | 0 | -5.288063 | 1.215083  | 0.595739  |

### Transition state methanolysis S<sub>N</sub>3

TS: 1,2,5-tmt 2CH<sub>3</sub>OH --> 2,5-dmt + CH<sub>3</sub>OH(OHCH<sub>3</sub>)CH<sub>3</sub> (in methanol)

Sum of electronic and zero-point Energies= -902.401098 (Hartree/particle)

Sum of electronic and thermal Free Energies= -902.446299 (Hartree/particle)

1 imaginary frequency (598.5068i cm<sup>-1</sup>)

Standard orientation:

| Center<br>Number | Atomic<br>Number | Atomic<br>Type | Coordinates (Angstroms) |           |           |
|------------------|------------------|----------------|-------------------------|-----------|-----------|
|                  |                  |                | X                       | Y         | Z         |
| 1                | 6                | 0              | -1.214328               | 1.065477  | 0.933837  |
| 2                | 6                | 0              | -1.600759               | 1.519595  | -0.276727 |
| 3                | 6                | 0              | -2.085649               | 0.490117  | -1.170775 |
| 4                | 6                | 0              | -2.067206               | -0.754146 | -0.647831 |
| 5                | 16               | 0              | -1.434225               | -0.688231 | 0.999850  |
| 6                | 1                | 0              | -1.548825               | 2.568236  | -0.547041 |
| 7                | 1                | 0              | -2.426365               | 0.689988  | -2.180195 |
| 8                | 6                | 0              | 0.714033                | -1.049655 | 0.394540  |
| 9                | 1                | 0              | 0.655660                | -2.129711 | 0.393348  |
| 10               | 1                | 0              | 0.516120                | -0.503023 | -0.515551 |
| 11               | 1                | 0              | 1.092674                | -0.549284 | 1.275587  |
| 12               | 6                | 0              | -0.651920               | 1.794979  | 2.106685  |
| 13               | 1                | 0              | 0.334042                | 1.412324  | 2.388631  |
| 14               | 1                | 0              | -0.550542               | 2.852808  | 1.859655  |
| 15               | 1                | 0              | -1.301262               | 1.705472  | 2.981183  |
| 16               | 6                | 0              | -2.436267               | -2.064392 | -1.255782 |
| 17               | 1                | 0              | -2.777910               | -1.903712 | -2.279270 |
| 18               | 1                | 0              | -1.579537               | -2.744322 | -1.282332 |
| 19               | 1                | 0              | -3.236129               | -2.557206 | -0.698227 |
| 20               | 8                | 0              | 2.607456                | -1.134620 | -0.289450 |
| 21               | 1                | 0              | 2.732100                | -0.169897 | -0.419118 |
| 22               | 8                | 0              | 2.228237                | 1.544779  | -0.565036 |
| 23               | 1                | 0              | 1.598326                | 1.763909  | 0.133625  |
| 24               | 6                | 0              | 3.535550                | -1.635764 | 0.672603  |
| 25               | 1                | 0              | 3.296673                | -2.684877 | 0.840586  |
| 26               | 1                | 0              | 4.551467                | -1.552598 | 0.282779  |
| 27               | 1                | 0              | 3.456733                | -1.085693 | 1.613684  |

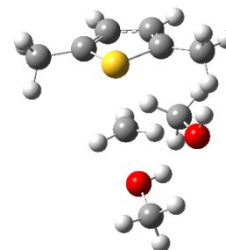

|    |   |   |          |          |           |
|----|---|---|----------|----------|-----------|
| 28 | 6 | 0 | 1.633189 | 1.803062 | -1.837859 |
| 29 | 1 | 0 | 1.261384 | 2.828392 | -1.891035 |
| 30 | 1 | 0 | 2.413310 | 1.666461 | -2.585622 |
| 31 | 1 | 0 | 0.814271 | 1.107518 | -2.044536 |

TS: 1,3-dmt 2CH<sub>3</sub>OH --> 3-mt + CH<sub>3</sub>OH(OHCH<sub>3</sub>)CH<sub>3</sub> (in methanol)

Sum of electronic and zero-point Energies= -863.118988 (Hartree/particle)

Sum of electronic and thermal Free Energies= -863.161960 (Hartree/particle)

1 imaginary frequency (590.7705i cm<sup>-1</sup>)

Standard orientation:

| Center Number | Atomic Number | Atomic Type | Coordinates (Angstroms) |           |           |
|---------------|---------------|-------------|-------------------------|-----------|-----------|
|               |               |             | X                       | Y         | Z         |
| 1             | 6             | 0           | 1.493937                | -0.178541 | -1.076979 |
| 2             | 6             | 0           | 2.183333                | 0.457972  | -0.105250 |
| 3             | 6             | 0           | 2.309748                | -0.355333 | 1.095292  |
| 4             | 6             | 0           | 1.719622                | -1.561311 | 1.000607  |
| 5             | 16            | 0           | 0.981678                | -1.773305 | -0.571038 |
| 6             | 1             | 0           | 2.826915                | -0.014288 | 1.984735  |
| 7             | 6             | 0           | -1.078243               | -1.076472 | 0.023617  |
| 8             | 1             | 0           | -1.385624               | -2.004462 | 0.486371  |
| 9             | 1             | 0           | -0.626763               | -0.302337 | 0.627283  |
| 10            | 1             | 0           | -1.358073               | -0.884392 | -1.002816 |
| 11            | 8             | 0           | -2.834374               | -0.225248 | 0.576800  |
| 12            | 1             | 0           | -2.651835               | 0.665917  | 0.207288  |
| 13            | 8             | 0           | -1.662809               | 1.977873  | -0.485279 |
| 14            | 1             | 0           | -1.124548               | 1.647453  | -1.215043 |
| 15            | 6             | 0           | -3.958219               | -0.819961 | -0.071609 |
| 16            | 1             | 0           | -4.063744               | -1.830656 | 0.320018  |
| 17            | 1             | 0           | -4.860699               | -0.248852 | 0.152936  |
| 18            | 1             | 0           | -3.807407               | -0.859124 | -1.153518 |
| 19            | 6             | 0           | -0.819528               | 2.605443  | 0.481274  |
| 20            | 1             | 0           | -0.240624               | 3.410274  | 0.023165  |
| 21            | 1             | 0           | -1.472509               | 3.026154  | 1.244914  |
| 22            | 1             | 0           | -0.141361               | 1.885269  | 0.948730  |
| 23            | 1             | 0           | 1.238638                | 0.167266  | -2.069643 |
| 24            | 6             | 0           | 2.747446                | 1.839063  | -0.212006 |
| 25            | 1             | 0           | 2.430189                | 2.448410  | 0.637983  |
| 26            | 1             | 0           | 3.840432                | 1.806871  | -0.197050 |
| 27            | 1             | 0           | 2.428391                | 2.327081  | -1.133332 |
| 28            | 1             | 0           | 1.650657                | -2.353852 | 1.732738  |

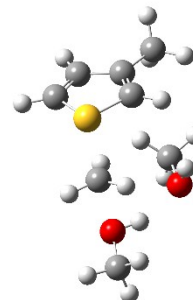

TS: 2e1-mt 2CH<sub>3</sub>OH --> 2-et + CH<sub>3</sub>OH(OHCH<sub>3</sub>)CH<sub>3</sub> (in methanol)

Sum of electronic and zero-point Energies= -902.394782 (Hartree/particle)

Sum of electronic and thermal Free Energies= -902.441088 (Hartree/particle)

1 imaginary frequency (587.5564i cm<sup>-1</sup>)

Standard orientation:

| Center Number | Atomic Number | Atomic Type | Coordinates (Angstroms) |           |           |
|---------------|---------------|-------------|-------------------------|-----------|-----------|
|               |               |             | X                       | Y         | Z         |
| 1             | 6             | 0           | 0.750447                | -1.872714 | 0.807556  |
| 2             | 6             | 0           | 1.312700                | -2.334296 | -0.327374 |
| 3             | 6             | 0           | 2.085840                | -1.335870 | -1.032567 |
| 4             | 6             | 0           | 2.111133                | -0.127648 | -0.428369 |
| 5             | 16            | 0           | 1.176003                | -0.198243 | 1.069505  |
| 6             | 1             | 0           | 1.194636                | -3.352951 | -0.675593 |

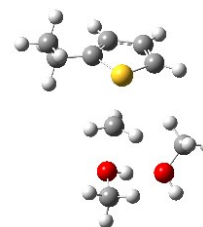

|    |   |   |           |           |           |
|----|---|---|-----------|-----------|-----------|
| 7  | 1 | 0 | 2.594359  | -1.527005 | -1.970196 |
| 8  | 6 | 0 | -0.680616 | 0.748676  | 0.217684  |
| 9  | 1 | 0 | -0.241486 | 1.736164  | 0.175616  |
| 10 | 1 | 0 | -0.635698 | 0.105007  | -0.649971 |
| 11 | 1 | 0 | -1.275483 | 0.472259  | 1.076784  |
| 12 | 6 | 0 | 2.755141  | 1.153452  | -0.852535 |
| 13 | 1 | 0 | 3.225186  | 0.972017  | -1.822118 |
| 14 | 1 | 0 | 1.981127  | 1.912411  | -1.013703 |
| 15 | 8 | 0 | -2.346120 | 1.543100  | -0.608645 |
| 16 | 1 | 0 | -2.907488 | 0.743156  | -0.738138 |
| 17 | 8 | 0 | -3.759598 | -0.734101 | -0.618141 |
| 18 | 1 | 0 | -4.620279 | -0.606084 | -0.201387 |
| 19 | 6 | 0 | -3.004891 | 2.413332  | 0.311017  |
| 20 | 1 | 0 | -2.324158 | 3.233865  | 0.534776  |
| 21 | 1 | 0 | -3.914151 | 2.811107  | -0.143674 |
| 22 | 1 | 0 | -3.258875 | 1.884424  | 1.233726  |
| 23 | 6 | 0 | -3.040742 | -1.761622 | 0.067927  |
| 24 | 1 | 0 | -3.609596 | -2.693604 | 0.064342  |
| 25 | 1 | 0 | -2.106096 | -1.913143 | -0.470699 |
| 26 | 1 | 0 | -2.825811 | -1.470936 | 1.099562  |
| 27 | 1 | 0 | 0.137938  | -2.388340 | 1.533702  |
| 28 | 6 | 0 | 3.787576  | 1.674448  | 0.148225  |
| 29 | 1 | 0 | 4.257232  | 2.582655  | -0.234410 |
| 30 | 1 | 0 | 3.329319  | 1.920034  | 1.109818  |
| 31 | 1 | 0 | 4.569489  | 0.932323  | 0.324372  |

TS: 1-mbt 2CH<sub>3</sub>OH --> bt + CH<sub>3</sub>OH(OHCH<sub>3</sub>)CH<sub>3</sub> (in methanol)

Sum of electronic and zero-point Energies= -977.419724 (Hartree/particle)

Sum of electronic and thermal Free Energies= -977.465736 (Hartree/particle)

1 imaginary frequency (594.0200i cm<sup>-1</sup>)

Standard orientation:

| Center Number | Atomic Number | Atomic Type | Coordinates (Angstroms) |           |           |
|---------------|---------------|-------------|-------------------------|-----------|-----------|
|               |               |             | X                       | Y         | Z         |
| 1             | 6             | 0           | -1.935992               | 0.194689  | -0.592377 |
| 2             | 6             | 0           | -2.390533               | 0.568698  | 0.681436  |
| 3             | 6             | 0           | -1.627897               | 1.675437  | 1.235962  |
| 4             | 6             | 0           | -0.649858               | 2.108249  | 0.425745  |
| 5             | 16            | 0           | -0.580178               | 1.207940  | -1.087593 |
| 6             | 1             | 0           | -1.829097               | 2.107597  | 2.208972  |
| 7             | 6             | 0           | 1.092652                | -0.212526 | -0.522460 |
| 8             | 1             | 0           | 1.815330                | 0.587721  | -0.434717 |
| 9             | 1             | 0           | 0.537807                | -0.536208 | 0.347716  |
| 10            | 6             | 0           | -2.500512               | -0.849919 | -1.313988 |
| 11            | 1             | 0           | -2.134013               | -1.122180 | -2.297367 |
| 12            | 6             | 0           | -3.560897               | -1.532901 | -0.729263 |
| 13            | 1             | 0           | -4.026379               | -2.351918 | -1.265802 |
| 14            | 6             | 0           | -3.461027               | -0.128812 | 1.247022  |
| 15            | 1             | 0           | -3.831174               | 0.147997  | 2.228164  |
| 16            | 6             | 0           | -4.036349               | -1.173428 | 0.537106  |
| 17            | 1             | 0           | -4.867385               | -1.719919 | 0.968759  |
| 18            | 1             | 0           | 3.353349                | -1.107929 | -0.337669 |
| 19            | 8             | 0           | 2.525780                | -1.513325 | 0.013660  |
| 20            | 1             | 0           | 1.011791                | -0.756360 | -1.452028 |
| 21            | 6             | 0           | 2.630672                | -1.596024 | 1.435893  |
| 22            | 1             | 0           | 1.741851                | -2.108429 | 1.802088  |
| 23            | 1             | 0           | 3.515467                | -2.174412 | 1.707910  |
| 24            | 1             | 0           | 2.689111                | -0.598946 | 1.881423  |
| 25            | 1             | 0           | 0.061447                | 2.906747  | 0.585251  |

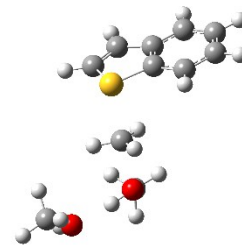

|    |   |   |          |           |           |
|----|---|---|----------|-----------|-----------|
| 26 | 8 | 0 | 4.764264 | -0.221358 | -0.689913 |
| 27 | 1 | 0 | 4.703149 | 0.257400  | -1.524840 |
| 28 | 6 | 0 | 5.171006 | 0.672347  | 0.348350  |
| 29 | 1 | 0 | 4.431724 | 1.462430  | 0.501129  |
| 30 | 1 | 0 | 5.263066 | 0.082763  | 1.259401  |
| 31 | 1 | 0 | 6.138864 | 1.119213  | 0.112561  |

TS: 1,2-dmbt 2CH<sub>3</sub>OH --> 2-mbt + CH<sub>3</sub>OH(OHCH<sub>3</sub>)CH<sub>3</sub> (in methanol)

Sum of electronic and zero-point Energies= -1016.702952 (Hartree/particle)

Sum of electronic and thermal Free Energies= -1016.751341 (Hartree/particle)

1 imaginary frequency (599.0402i cm-1)

Standard orientation:

| Center Number | Atomic Number | Atomic Type | Coordinates (Angstroms) |           |           |
|---------------|---------------|-------------|-------------------------|-----------|-----------|
|               |               |             | X                       | Y         | Z         |
| 1             | 6             | 0           | -1.791313               | -0.323608 | -0.630371 |
| 2             | 6             | 0           | -2.508650               | 0.359014  | 0.364017  |
| 3             | 6             | 0           | -1.968237               | 1.681574  | 0.625865  |
| 4             | 6             | 0           | -0.895434               | 2.002286  | -0.118084 |
| 5             | 16            | 0           | -0.464341               | 0.673726  | -1.221835 |
| 6             | 1             | 0           | -2.389320               | 2.357186  | 1.361893  |
| 7             | 6             | 0           | 1.162747                | -0.228475 | 0.067746  |
| 8             | 1             | 0           | 1.863869                | 0.557726  | -0.175861 |
| 9             | 1             | 0           | 0.531608                | -0.144039 | 0.942032  |
| 10            | 6             | 0           | -2.112400               | -1.611348 | -1.039527 |
| 11            | 1             | 0           | -1.545054               | -2.118339 | -1.811988 |
| 12            | 6             | 0           | -3.196265               | -2.229132 | -0.424426 |
| 13            | 1             | 0           | -3.474107               | -3.234259 | -0.720374 |
| 14            | 6             | 0           | -3.597368               | -0.279365 | 0.964011  |
| 15            | 1             | 0           | -4.169009               | 0.229864  | 1.732244  |
| 16            | 6             | 0           | -3.930836               | -1.567148 | 0.565520  |
| 17            | 1             | 0           | -4.773490               | -2.068766 | 1.027888  |
| 18            | 1             | 0           | 3.319813                | -1.208323 | 0.690834  |
| 19            | 8             | 0           | 2.537572                | -1.039081 | 1.268535  |
| 20            | 1             | 0           | 1.169548                | -1.146690 | -0.502074 |
| 21            | 6             | 0           | 2.917677                | -0.115037 | 2.287978  |
| 22            | 1             | 0           | 2.059460                | 0.024704  | 2.944036  |
| 23            | 1             | 0           | 3.749530                | -0.524673 | 2.863190  |
| 24            | 1             | 0           | 3.208706                | 0.845838  | 1.854651  |
| 25            | 8             | 0           | 4.687737                | -1.174126 | -0.298391 |
| 26            | 1             | 0           | 4.900873                | -2.024011 | -0.701670 |
| 27            | 6             | 0           | 4.528313                | -0.184585 | -1.316590 |
| 28            | 1             | 0           | 3.698822                | -0.434222 | -1.982373 |
| 29            | 1             | 0           | 4.320346                | 0.759299  | -0.813989 |
| 30            | 1             | 0           | 5.445856                | -0.082191 | -1.898935 |
| 31            | 6             | 0           | -0.064363               | 3.238523  | -0.122996 |
| 32            | 1             | 0           | 0.978083                | 3.017546  | 0.123849  |
| 33            | 1             | 0           | -0.079883               | 3.724285  | -1.101630 |
| 34            | 1             | 0           | -0.451901               | 3.938910  | 0.617627  |

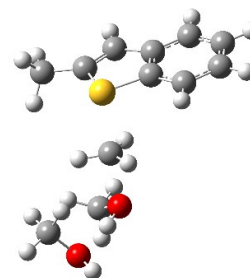

TS: 1e2-mbt 2CH<sub>3</sub>OH --> 2-mbt + CH<sub>3</sub>CH<sub>2</sub>OH(OHCH<sub>3</sub>)CH<sub>3</sub> (in methanol)

Sum of electronic and zero-point Energies= -1055.982560 (Hartree/particle)

Sum of electronic and thermal Free Energies= -1056.032558 (Hartree/particle)

1 imaginary frequency (547.3320i cm-1)

Standard orientation:

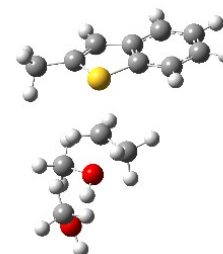

| Center Number | Atomic Number | Atomic Type | Coordinates (Angstroms) |           |           |
|---------------|---------------|-------------|-------------------------|-----------|-----------|
|               |               |             | X                       | Y         | Z         |
| 1             | 6             | 0           | -1.971416               | -0.389349 | -0.543838 |
| 2             | 6             | 0           | -2.552688               | 0.511031  | 0.364307  |
| 3             | 6             | 0           | -1.925656               | 1.819298  | 0.320316  |
| 4             | 6             | 0           | -0.921997               | 1.923312  | -0.569629 |
| 5             | 16            | 0           | -0.662486               | 0.387095  | -1.425468 |
| 6             | 1             | 0           | -2.233838               | 2.645553  | 0.950984  |
| 7             | 6             | 0           | 1.099853                | -0.246960 | 0.025734  |
| 8             | 1             | 0           | 1.697007                | 0.538937  | -0.416744 |
| 9             | 1             | 0           | 0.429695                | 0.009172  | 0.835469  |
| 10            | 6             | 0           | -2.409173               | -1.701681 | -0.681962 |
| 11            | 1             | 0           | -1.955128               | -2.376099 | -1.399167 |
| 12            | 6             | 0           | -3.458918               | -2.119676 | 0.128397  |
| 13            | 1             | 0           | -3.822163               | -3.137643 | 0.045642  |
| 14            | 6             | 0           | -3.610703               | 0.069644  | 1.164428  |
| 15            | 1             | 0           | -4.076833               | 0.748770  | 1.870066  |
| 16            | 6             | 0           | -4.052530               | -1.240792 | 1.041832  |
| 17            | 1             | 0           | -4.872175               | -1.589130 | 1.660216  |
| 18            | 1             | 0           | 3.348509                | -0.544651 | 1.194254  |
| 19            | 8             | 0           | 2.502214                | -0.197252 | 1.560517  |
| 20            | 6             | 0           | 2.694838                | 1.162941  | 1.941879  |
| 21            | 1             | 0           | 1.714008                | 1.591720  | 2.151376  |
| 22            | 1             | 0           | 3.306552                | 1.215327  | 2.844669  |
| 23            | 1             | 0           | 3.177695                | 1.729853  | 1.141510  |
| 24            | 8             | 0           | 4.752595                | -0.883743 | 0.322679  |
| 25            | 1             | 0           | 5.356135                | -1.588363 | 0.585189  |
| 26            | 6             | 0           | 4.573673                | -0.892735 | -1.093447 |
| 27            | 1             | 0           | 4.272143                | -1.880511 | -1.447140 |
| 28            | 1             | 0           | 3.789586                | -0.170870 | -1.321768 |
| 29            | 1             | 0           | 5.493903                | -0.589880 | -1.597733 |
| 30            | 6             | 0           | -0.023397               | 3.074576  | -0.866583 |
| 31            | 1             | 0           | 1.013388                | 2.845510  | -0.600317 |
| 32            | 1             | 0           | -0.044697               | 3.336553  | -1.926999 |
| 33            | 1             | 0           | -0.341556               | 3.942544  | -0.287849 |
| 34            | 6             | 0           | 1.274973                | -1.664815 | -0.405323 |
| 35            | 1             | 0           | 1.562358                | -1.730569 | -1.454390 |
| 36            | 1             | 0           | 2.073942                | -2.121590 | 0.184756  |
| 37            | 1             | 0           | 0.371626                | -2.248961 | -0.226780 |

TS: 1b2-mbt 2CH<sub>3</sub>OH --> 2-mbt + CH<sub>3</sub>CH<sub>2</sub>CH<sub>2</sub>CH<sub>2</sub>OH(OHCH<sub>3</sub>)CH<sub>3</sub> (in methanol)

Sum of electronic and zero-point Energies= -1018.869183 (Hartree/particle)

Sum of electronic and thermal Free Energies= -1134.579283 (Hartree/particle)

1 imaginary frequency (495.9264i cm<sup>-1</sup>)

Standard orientation:

| Center Number | Atomic Number | Atomic Type | Coordinates (Angstroms) |           |           |
|---------------|---------------|-------------|-------------------------|-----------|-----------|
|               |               |             | X                       | Y         | Z         |
| 1             | 6             | 0           | 1.421991                | 0.369334  | 0.755480  |
| 2             | 6             | 0           | 1.932470                | 0.817960  | -0.474921 |
| 3             | 6             | 0           | 1.086940                | 1.825416  | -1.087574 |
| 4             | 6             | 0           | -0.016348               | 2.127536  | -0.378685 |
| 5             | 16            | 0           | -0.081902               | 1.194107  | 1.134521  |
| 6             | 1             | 0           | 1.317742                | 2.296715  | -2.036245 |
| 7             | 6             | 0           | -1.893587               | -0.366777 | 0.617462  |
| 8             | 1             | 0           | -2.292541               | -0.195889 | 1.609058  |
| 9             | 1             | 0           | -2.159729               | 0.335532  | -0.161140 |
| 10            | 6             | 0           | 2.066120                | -0.591393 | 1.526864  |

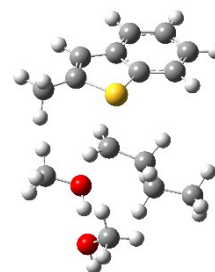

|    |   |   |           |           |           |
|----|---|---|-----------|-----------|-----------|
| 11 | 1 | 0 | 1.662646  | -0.913864 | 2.480412  |
| 12 | 6 | 0 | 3.254137  | -1.124122 | 1.036830  |
| 13 | 1 | 0 | 3.778050  | -1.876771 | 1.614939  |
| 14 | 6 | 0 | 3.125878  | 0.266459  | -0.948030 |
| 15 | 1 | 0 | 3.537560  | 0.597135  | -1.895489 |
| 16 | 6 | 0 | 3.775494  | -0.700136 | -0.190033 |
| 17 | 1 | 0 | 4.702094  | -1.130811 | -0.552759 |
| 18 | 6 | 0 | -1.102694 | 3.104423  | -0.674536 |
| 19 | 1 | 0 | -1.143526 | 3.889624  | 0.084433  |
| 20 | 1 | 0 | -0.918045 | 3.569650  | -1.643534 |
| 21 | 1 | 0 | -2.084211 | 2.623090  | -0.706274 |
| 22 | 6 | 0 | -1.113823 | -1.592776 | 0.305630  |
| 23 | 1 | 0 | -0.293281 | -1.697237 | 1.022731  |
| 24 | 1 | 0 | -1.765042 | -2.447804 | 0.520070  |
| 25 | 1 | 0 | -4.068808 | -1.714940 | 0.868732  |
| 26 | 8 | 0 | -3.792979 | -1.174152 | 0.115928  |
| 27 | 6 | 0 | -4.740238 | -0.123724 | -0.095437 |
| 28 | 1 | 0 | -4.451533 | 0.384167  | -1.014337 |
| 29 | 1 | 0 | -5.741316 | -0.540561 | -0.212853 |
| 30 | 1 | 0 | -4.729585 | 0.584442  | 0.736544  |
| 31 | 6 | 0 | -0.606360 | -1.632941 | -1.133075 |
| 32 | 1 | 0 | -0.182559 | -0.659730 | -1.398682 |
| 33 | 1 | 0 | -1.456814 | -1.792515 | -1.803554 |
| 34 | 6 | 0 | 0.442987  | -2.717789 | -1.333688 |
| 35 | 1 | 0 | 0.047616  | -3.704096 | -1.073873 |
| 36 | 1 | 0 | 0.779531  | -2.755720 | -2.372119 |
| 37 | 1 | 0 | 1.318206  | -2.531753 | -0.703552 |

## Methanolysis byproducts

### 2,5-dmt (in methanol)

Sum of electronic and zero-point Energies= -631.459517 (Hartree/particle)

Sum of electronic and thermal Free Energies= -631.490933 (Hartree/particle)

No imaginary frequencies

Standard orientation:

| Center<br>Number | Atomic<br>Number | Atomic<br>Type | Coordinates (Angstroms) |           |           |
|------------------|------------------|----------------|-------------------------|-----------|-----------|
|                  |                  |                | X                       | Y         | Z         |
| 1                | 6                | 0              | 1.259744                | -0.125966 | 0.000020  |
| 2                | 6                | 0              | 0.716060                | -1.374699 | -0.000087 |
| 3                | 6                | 0              | -0.716061               | -1.374698 | 0.000069  |
| 4                | 6                | 0              | -1.259744               | -0.125965 | -0.000001 |
| 5                | 16               | 0              | 0.000000                | 1.075708  | -0.000017 |
| 6                | 1                | 0              | 1.322392                | -2.273666 | -0.000138 |
| 7                | 1                | 0              | -1.322392               | -2.273666 | 0.000107  |
| 8                | 6                | 0              | -2.703337               | 0.265167  | -0.000001 |
| 9                | 1                | 0              | -2.963680               | 0.856597  | 0.881707  |
| 10               | 1                | 0              | -2.963705               | 0.856555  | -0.881732 |
| 11               | 1                | 0              | -3.324881               | -0.632162 | 0.000031  |
| 12               | 6                | 0              | 2.703337                | 0.265166  | 0.000032  |
| 13               | 1                | 0              | 2.963689                | 0.856592  | -0.881677 |
| 14               | 1                | 0              | 2.963696                | 0.856560  | 0.881762  |
| 15               | 1                | 0              | 3.324881                | -0.632162 | 0.000012  |

### 3-mt (in metanol)

Sum of electronic and zero-point Energies= -592.180800 (Hartree/particle)



Sum of electronic and thermal Free Energies= -592.211170 (Hartree/particle)  
No imaginary frequencies

Standard orientation:

| Center<br>Number | Atomic<br>Number | Atomic<br>Type | Coordinates (Angstroms) |           |           |
|------------------|------------------|----------------|-------------------------|-----------|-----------|
|                  |                  |                | X                       | Y         | Z         |
| 1                | 6                | 0              | 1.035859                | 1.147027  | -0.000173 |
| 2                | 6                | 0              | -0.321363               | 1.244860  | 0.000149  |
| 3                | 6                | 0              | -0.979783               | -0.030217 | -0.000073 |
| 4                | 6                | 0              | -0.080638               | -1.056151 | -0.000053 |
| 5                | 16               | 0              | 1.553616                | -0.497477 | 0.000060  |
| 6                | 1                | 0              | -0.850927               | 2.190530  | 0.000269  |
| 7                | 1                | 0              | -0.285431               | -2.118020 | -0.000053 |
| 8                | 1                | 0              | 1.766255                | 1.943874  | -0.000259 |
| 9                | 6                | 0              | -2.470958               | -0.197061 | -0.000009 |
| 10               | 1                | 0              | -2.918363               | 0.271955  | 0.880282  |
| 11               | 1                | 0              | -2.918494               | 0.272381  | -0.880004 |
| 12               | 1                | 0              | -2.749603               | -1.251831 | -0.000234 |

2-et (in methanol)

Sum of electronic and zero-point Energies= -631.455159 (Hartree/particle)  
Sum of electronic and thermal Free Energies= -631.487113 (Hartree/particle)  
No imaginary frequencies

Standard orientation:

| Center<br>Number | Atomic<br>Number | Atomic<br>Type | Coordinates (Angstroms) |           |           |
|------------------|------------------|----------------|-------------------------|-----------|-----------|
|                  |                  |                | X                       | Y         | Z         |
| 1                | 6                | 0              | 2.016891                | -0.440216 | 0.171360  |
| 2                | 6                | 0              | 1.924809                | 0.916007  | 0.227815  |
| 3                | 6                | 0              | 0.592822                | 1.384687  | -0.002255 |
| 4                | 6                | 0              | -0.305778               | 0.383065  | -0.230764 |
| 5                | 16               | 0              | 0.484840                | -1.163857 | -0.160765 |
| 6                | 1                | 0              | 2.770173                | 1.562688  | 0.428798  |
| 7                | 1                | 0              | 0.309852                | 2.431285  | -0.000050 |
| 8                | 6                | 0              | -1.778318               | 0.495352  | -0.495822 |
| 9                | 1                | 0              | -2.010755               | 0.089833  | -1.485763 |
| 10               | 1                | 0              | -2.024657               | 1.560054  | -0.527086 |
| 11               | 6                | 0              | -2.636674               | -0.206476 | 0.558031  |
| 12               | 1                | 0              | -3.698181               | -0.047090 | 0.355265  |
| 13               | 1                | 0              | -2.458449               | -1.284922 | 0.565315  |
| 14               | 1                | 0              | -2.417906               | 0.178243  | 1.557222  |
| 15               | 1                | 0              | 2.889976                | -1.062897 | 0.308353  |

Bt (in metanol)

Sum of electronic and zero-point Energies= -706.479639 (Hartree/particle)  
Sum of electronic and thermal Free Energies= -706.510632 (Hartree/particle)  
No imaginary frequencies

Standard orientation:

| Center<br>Number | Atomic<br>Number | Atomic<br>Type | Coordinates (Angstroms) |           |           |
|------------------|------------------|----------------|-------------------------|-----------|-----------|
|                  |                  |                | X                       | Y         | Z         |
| 1                | 6                | 0              | 0.109426                | 0.847375  | 0.000063  |
| 2                | 6                | 0              | -0.062143               | -0.551281 | -0.000037 |
| 3                | 6                | 0              | 1.028414                | -1.425475 | 0.000061  |
| 4                | 6                | 0              | 2.302171                | -0.882225 | 0.000255  |

|    |    |   |           |           |           |
|----|----|---|-----------|-----------|-----------|
| 5  | 6  | 0 | 2.493040  | 0.510354  | 0.000355  |
| 6  | 6  | 0 | 1.411912  | 1.372676  | 0.000260  |
| 7  | 6  | 0 | -1.152763 | 1.545399  | -0.000067 |
| 8  | 6  | 0 | -2.211104 | 0.705094  | -0.000253 |
| 9  | 1  | 0 | 0.880986  | -2.499791 | -0.000016 |
| 10 | 1  | 0 | 3.163103  | -1.541422 | 0.000332  |
| 11 | 1  | 0 | 3.500960  | 0.909877  | 0.000510  |
| 12 | 1  | 0 | 1.560387  | 2.447496  | 0.000335  |
| 13 | 1  | 0 | -1.242039 | 2.624635  | -0.000021 |
| 14 | 1  | 0 | -3.261330 | 0.963140  | -0.000374 |
| 15 | 16 | 0 | -1.757236 | -0.977215 | -0.000286 |

2-mbt (in methanol)

Sum of electronic and zero-point Energies= -745.760465 (Hartree/particle)

Sum of electronic and thermal Free Energies= -745.794022 (Hartree/particle)

No imaginary frequencies

Standard orientation:

| Center Number | Atomic Number | Atomic Type | Coordinates (Angstroms) |           |           |
|---------------|---------------|-------------|-------------------------|-----------|-----------|
|               |               |             | X                       | Y         | Z         |
| 1             | 6             | 0           | -0.399643               | 0.792654  | -0.000088 |
| 2             | 6             | 0           | -0.427604               | -0.616026 | -0.000047 |
| 3             | 6             | 0           | -1.628897               | -1.327447 | -0.000169 |
| 4             | 6             | 0           | -2.815900               | -0.610666 | -0.000325 |
| 5             | 6             | 0           | -2.808257               | 0.793537  | -0.000362 |
| 6             | 6             | 0           | -1.614544               | 1.495053  | -0.000247 |
| 7             | 6             | 0           | 0.948447                | 1.305491  | 0.000060  |
| 8             | 6             | 0           | 1.896089                | 0.338761  | 0.000213  |
| 9             | 1             | 0           | -1.636166               | -2.412134 | -0.000140 |
| 10            | 1             | 0           | -3.760363               | -1.143683 | -0.000420 |
| 11            | 1             | 0           | -3.749157               | 1.332947  | -0.000484 |
| 12            | 1             | 0           | -1.610215               | 2.580335  | -0.000276 |
| 13            | 1             | 0           | 1.186834                | 2.363295  | 0.000058  |
| 14            | 16            | 0           | 1.192373                | -1.271129 | 0.000177  |
| 15            | 6             | 0           | 3.381624                | 0.495105  | 0.000445  |
| 16            | 1             | 0           | 3.831011                | 0.032062  | 0.882599  |
| 17            | 1             | 0           | 3.831376                | 0.031566  | -0.881259 |
| 18            | 1             | 0           | 3.640824                | 1.554904  | 0.000213  |

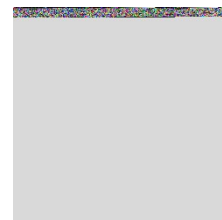

CH<sub>3</sub>OHCH<sub>3</sub> (in methanol)

Sum of electronic and zero-point Energies= -155.308848 (Hartree/particle)

Sum of electronic and thermal Free Energies= -155.334811 (Hartree/particle)

No imaginary frequencies

Standard orientation:

| Center Number | Atomic Number | Atomic Type | Coordinates (Angstroms) |           |           |
|---------------|---------------|-------------|-------------------------|-----------|-----------|
|               |               |             | X                       | Y         | Z         |
| 1             | 6             | 0           | -1.274559               | -0.234652 | 0.000000  |
| 2             | 1             | 0           | -1.031626               | -1.293253 | 0.000000  |
| 3             | 1             | 0           | -1.807880               | 0.049392  | 0.902577  |
| 4             | 1             | 0           | -1.807880               | 0.049391  | -0.902576 |
| 5             | 8             | 0           | 0.000123                | 0.468774  | 0.000000  |
| 6             | 1             | 0           | -0.001661               | 1.438506  | 0.000000  |
| 7             | 6             | 0           | 1.272297                | -0.238583 | 0.000000  |

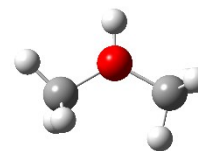

|    |   |   |          |           |           |
|----|---|---|----------|-----------|-----------|
| 8  | 1 | 0 | 2.041614 | 0.527621  | -0.000001 |
| 9  | 1 | 0 | 1.310011 | -0.841218 | 0.903582  |
| 10 | 1 | 0 | 1.310010 | -0.841220 | -0.903580 |

CH<sub>3</sub>CH<sub>2</sub>OHCH<sub>3</sub> (in methanol)

Sum of electronic and zero-point Energies= -194.593575 (Hartree/particle)

Sum of electronic and thermal Free Energies= -194.621722 (Hartree/particle)

No imaginary frequencies

Standard orientation:

| Center Number | Atomic Number | Atomic Type | Coordinates (Angstroms) |           |           |
|---------------|---------------|-------------|-------------------------|-----------|-----------|
|               |               |             | X                       | Y         | Z         |
| 1             | 8             | 0           | -0.514889               | -0.452936 | -0.040391 |
| 2             | 6             | 0           | 0.575662                | 0.546888  | 0.094039  |
| 3             | 1             | 0           | 0.445973                | 1.016687  | 1.068351  |
| 4             | 1             | 0           | 0.369727                | 1.256904  | -0.703699 |
| 5             | 6             | 0           | 1.890101                | -0.160164 | -0.069237 |
| 6             | 1             | 0           | 2.684931                | 0.584322  | 0.010901  |
| 7             | 1             | 0           | 2.043454                | -0.904609 | 0.714587  |
| 8             | 1             | 0           | 1.961770                | -0.638495 | -1.046722 |
| 9             | 6             | 0           | -1.875032               | 0.092007  | -0.048933 |
| 10            | 1             | 0           | -1.945353               | 0.699078  | -0.946184 |
| 11            | 1             | 0           | -2.540838               | -0.764245 | -0.094627 |
| 12            | 1             | 0           | -2.022094               | 0.676396  | 0.856869  |
| 13            | 1             | 0           | -0.422836               | -1.174936 | 0.608429  |

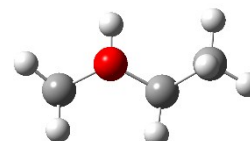

CH<sub>3</sub>CH<sub>2</sub>CH<sub>2</sub>CH<sub>2</sub>OHCH<sub>3</sub> (in methanol)

Sum of electronic and zero-point Energies= -273.140370 (Hartree/particle)

Sum of electronic and thermal Free Energies= -273.172484 (Hartree/particle)

No imaginary frequencies

Standard orientation:

| Center Number | Atomic Number | Atomic Type | Coordinates (Angstroms) |           |           |
|---------------|---------------|-------------|-------------------------|-----------|-----------|
|               |               |             | X                       | Y         | Z         |
| 1             | 8             | 0           | -1.463259               | -0.392853 | -0.215514 |
| 2             | 6             | 0           | -0.704428               | 0.787866  | 0.279383  |
| 3             | 1             | 0           | -0.776364               | 0.763392  | 1.367342  |
| 4             | 1             | 0           | -1.261429               | 1.631996  | -0.121648 |
| 5             | 6             | 0           | 0.708044                | 0.733179  | -0.240494 |
| 6             | 1             | 0           | 1.155566                | 1.694662  | 0.035674  |
| 7             | 1             | 0           | 0.686785                | 0.698632  | -1.334249 |
| 8             | 6             | 0           | -2.917498               | -0.316083 | -0.046835 |
| 9             | 1             | 0           | -3.247424               | 0.500609  | -0.681193 |
| 10            | 1             | 0           | -3.309986               | -1.268682 | -0.388931 |
| 11            | 1             | 0           | -3.137301               | -0.135843 | 1.003461  |
| 12            | 1             | 0           | -1.116780               | -1.228723 | 0.145459  |
| 13            | 6             | 0           | 1.558422                | -0.402834 | 0.324075  |
| 14            | 1             | 0           | 1.154021                | -1.372400 | 0.012532  |
| 15            | 1             | 0           | 1.514574                | -0.376958 | 1.418045  |
| 16            | 6             | 0           | 3.006317                | -0.296167 | -0.140746 |
| 17            | 1             | 0           | 3.453419                | 0.646211  | 0.187940  |
| 18            | 1             | 0           | 3.613115                | -1.111618 | 0.259135  |
| 19            | 1             | 0           | 3.072726                | -0.334215 | -1.231751 |

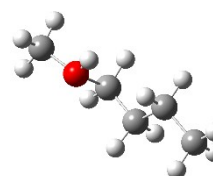

CH<sub>3</sub>OH(OHCH<sub>3</sub>)CH<sub>3</sub> (in methanol)

Sum of electronic and zero-point Energies= -270.987220 (Hartree/particle)  
 Sum of electronic and thermal Free Energies= -271.019785 (Hartree/particle)  
 No imaginary frequencies

Standard orientation:

| Center Number | Atomic Number | Atomic Type | Coordinates (Angstroms) |           |           |
|---------------|---------------|-------------|-------------------------|-----------|-----------|
|               |               |             | X                       | Y         | Z         |
| 1             | 6             | 0           | -1.443991               | 1.259188  | 0.030399  |
| 2             | 1             | 0           | -2.358810               | 1.357497  | -0.549987 |
| 3             | 1             | 0           | -0.729415               | 2.031639  | -0.243537 |
| 4             | 1             | 0           | -1.652106               | 1.277775  | 1.100570  |
| 5             | 8             | 0           | -0.837914               | -0.005038 | -0.318885 |
| 6             | 1             | 0           | 0.187469                | -0.092249 | 0.096768  |
| 7             | 8             | 0           | 1.397567                | -0.194911 | 0.587329  |
| 8             | 1             | 0           | 1.507263                | 0.402108  | 1.340053  |
| 9             | 6             | 0           | -1.652134               | -1.157952 | -0.003153 |
| 10            | 1             | 0           | -2.565725               | -1.085488 | -0.589336 |
| 11            | 1             | 0           | -1.076016               | -2.033078 | -0.292616 |
| 12            | 1             | 0           | -1.869501               | -1.164387 | 1.065101  |
| 13            | 6             | 0           | 2.434837                | 0.020255  | -0.390592 |
| 14            | 1             | 0           | 3.403707                | -0.141921 | 0.078222  |
| 15            | 1             | 0           | 2.275797                | -0.711854 | -1.178673 |
| 16            | 1             | 0           | 2.367846                | 1.030605  | -0.794038 |

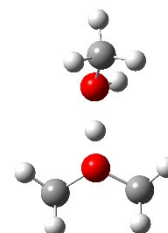

CH<sub>2</sub>OH(OHCH<sub>3</sub>)CH<sub>3</sub> (in methanol)

Sum of electronic and zero-point Energies= -310.267201 (Hartree/particle)  
 Sum of electronic and thermal Free Energies= -310.302380 (Hartree/particle)  
 No imaginary frequencies

Standard orientation:

| Center Number | Atomic Number | Atomic Type | Coordinates (Angstroms) |           |           |
|---------------|---------------|-------------|-------------------------|-----------|-----------|
|               |               |             | X                       | Y         | Z         |
| 1             | 6             | 0           | -1.287819               | 1.779728  | -0.129967 |
| 2             | 1             | 0           | -2.201753               | 1.803678  | -0.718830 |
| 3             | 1             | 0           | -0.562043               | 2.490366  | -0.517861 |
| 4             | 1             | 0           | -1.493315               | 1.962875  | 0.924804  |
| 5             | 8             | 0           | -0.701199               | 0.465893  | -0.284998 |
| 6             | 1             | 0           | 0.306090                | 0.431883  | 0.132858  |
| 7             | 8             | 0           | 1.561242                | 0.337170  | 0.604047  |
| 8             | 1             | 0           | 1.870880                | 1.168411  | 0.987573  |
| 9             | 6             | 0           | -1.534516               | -0.632822 | 0.202257  |
| 10            | 1             | 0           | -2.466296               | -0.561192 | -0.357868 |
| 11            | 1             | 0           | -1.724355               | -0.452797 | 1.262212  |
| 12            | 6             | 0           | 2.495325                | -0.152673 | -0.375450 |
| 13            | 1             | 0           | 3.452060                | -0.346919 | 0.106887  |
| 14            | 1             | 0           | 2.081818                | -1.080319 | -0.765542 |
| 15            | 1             | 0           | 2.614523                | 0.571878  | -1.181302 |
| 16            | 6             | 0           | -0.811323               | -1.930289 | -0.048366 |
| 17            | 1             | 0           | 0.123242                | -1.979608 | 0.514006  |
| 18            | 1             | 0           | -1.447811               | -2.753640 | 0.281381  |
| 19            | 1             | 0           | -0.603384               | -2.062786 | -1.111558 |

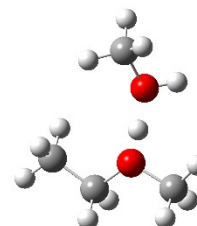

CH<sub>3</sub>CH<sub>2</sub>CH<sub>2</sub>CH<sub>2</sub>OH(OHCH<sub>3</sub>)CH<sub>3</sub> (in methanol)

Sum of electronic and zero-point Energies= -388.814725 (Hartree/particle)  
 Sum of electronic and thermal Free Energies= -388.852978 (Hartree/particle)

No imaginary frequencies

Standard orientation:

| Center<br>Number | Atomic<br>Number | Atomic<br>Type | Coordinates (Angstroms) |           |           |
|------------------|------------------|----------------|-------------------------|-----------|-----------|
|                  |                  |                | X                       | Y         | Z         |
| 1                | 6                | 0              | -2.092732               | -1.955745 | -0.100320 |
| 2                | 1                | 0              | -1.776944               | -2.824337 | -0.673276 |
| 3                | 1                | 0              | -3.044669               | -1.578888 | -0.466080 |
| 4                | 1                | 0              | -2.139848               | -2.180339 | 0.965261  |
| 5                | 8                | 0              | -1.120154               | -0.906729 | -0.326056 |
| 6                | 1                | 0              | -1.471548               | 0.026061  | 0.093810  |
| 7                | 8                | 0              | -1.903065               | 1.208893  | 0.608549  |
| 8                | 1                | 0              | -2.790859               | 1.141734  | 0.984507  |
| 9                | 6                | 0              | 0.231289                | -1.229640 | 0.128829  |
| 10               | 1                | 0              | 0.510592                | -2.134533 | -0.411709 |
| 11               | 1                | 0              | 0.173175                | -1.440434 | 1.199532  |
| 12               | 6                | 0              | -1.827491               | 2.302317  | -0.323113 |
| 13               | 1                | 0              | -2.002443               | 3.238363  | 0.205467  |
| 14               | 1                | 0              | -0.820240               | 2.293046  | -0.734295 |
| 15               | 1                | 0              | -2.557968               | 2.172731  | -1.121903 |
| 16               | 6                | 0              | 1.144702                | -0.068631 | -0.185764 |
| 17               | 1                | 0              | 0.795860                | 0.826025  | 0.341428  |
| 18               | 1                | 0              | 1.104653                | 0.140115  | -1.259592 |
| 19               | 6                | 0              | 2.580173                | -0.385838 | 0.231162  |
| 20               | 1                | 0              | 2.917522                | -1.287350 | -0.290837 |
| 21               | 1                | 0              | 2.606184                | -0.613701 | 1.301879  |
| 22               | 6                | 0              | 3.526171                | 0.770108  | -0.073286 |
| 23               | 1                | 0              | 3.230888                | 1.673493  | 0.467913  |
| 24               | 1                | 0              | 4.552344                | 0.529229  | 0.214239  |
| 25               | 1                | 0              | 3.526383                | 1.006053  | -1.141340 |

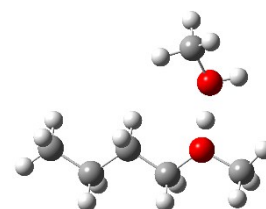

## IRCs

Synthesis Reaction coordinates

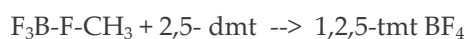

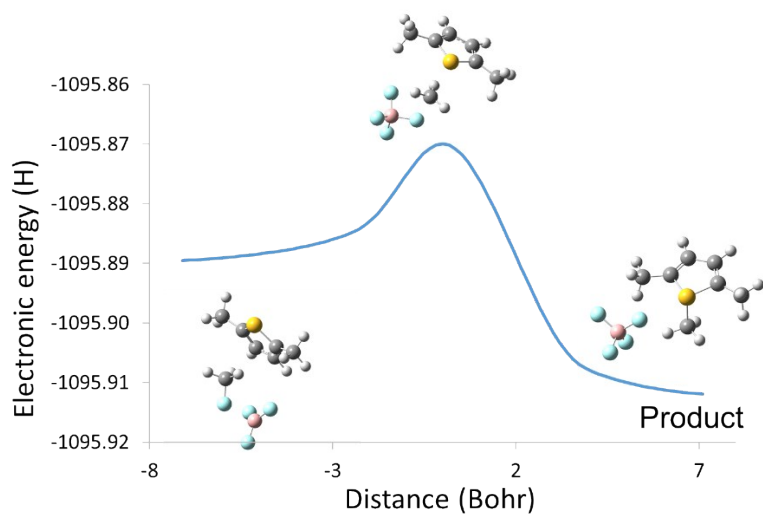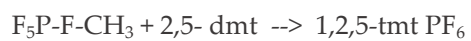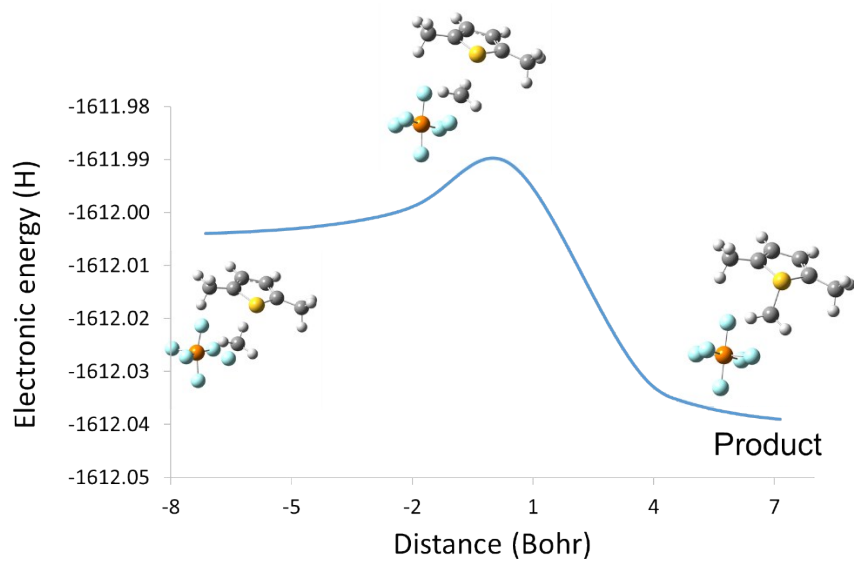

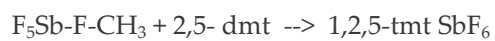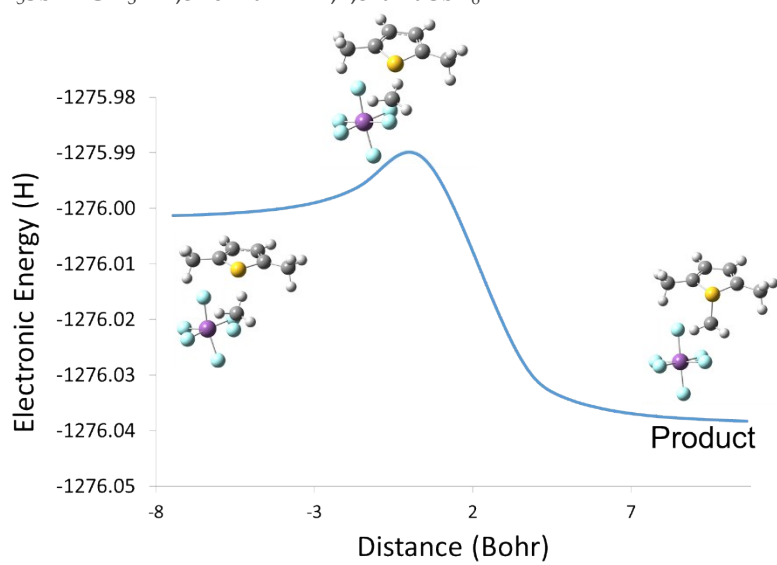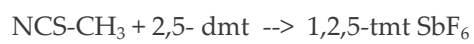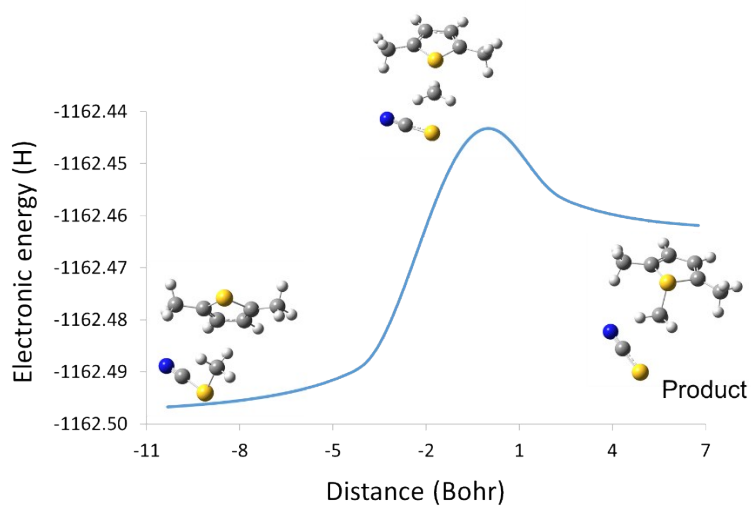

### Sovolysis Reaction coordinates

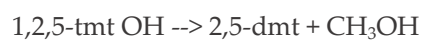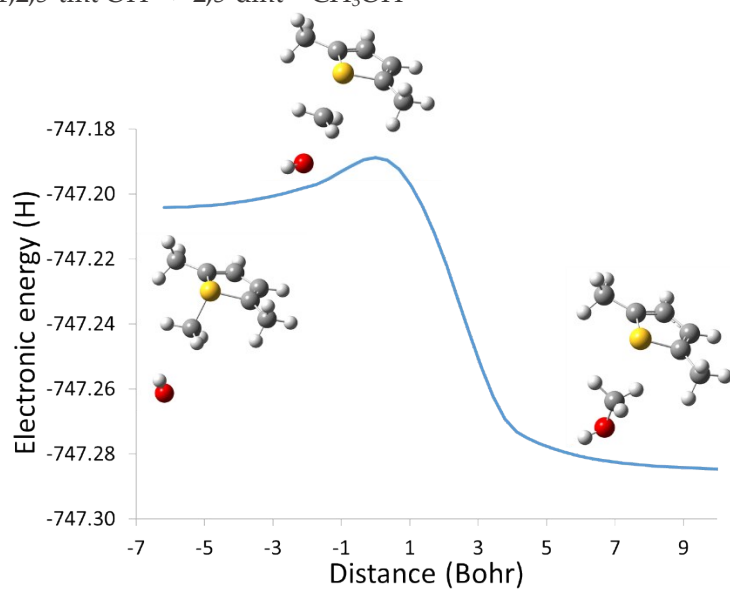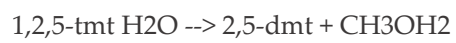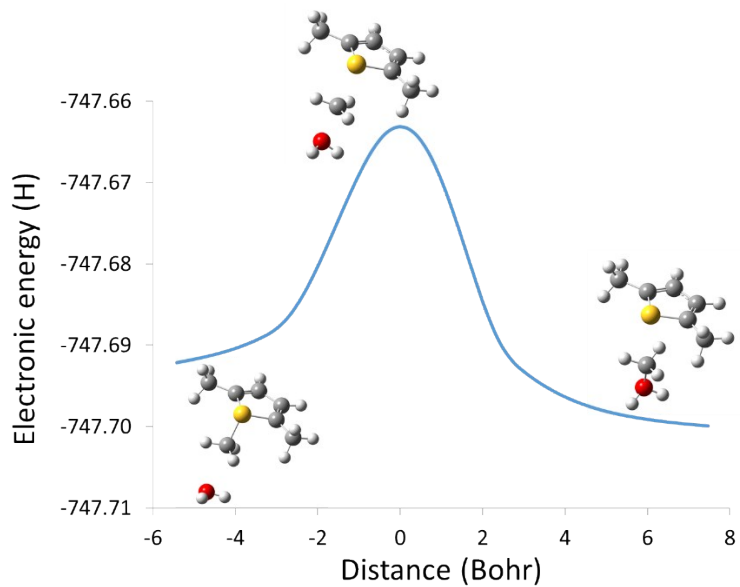



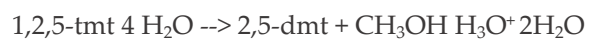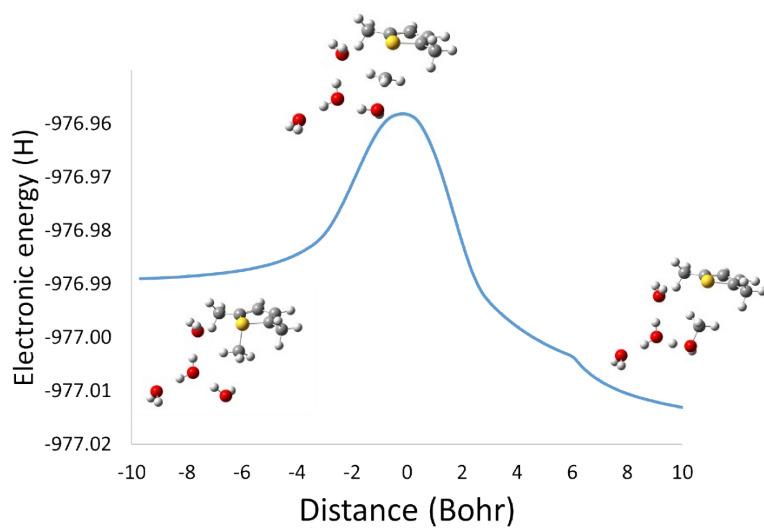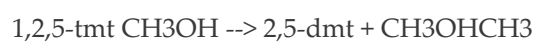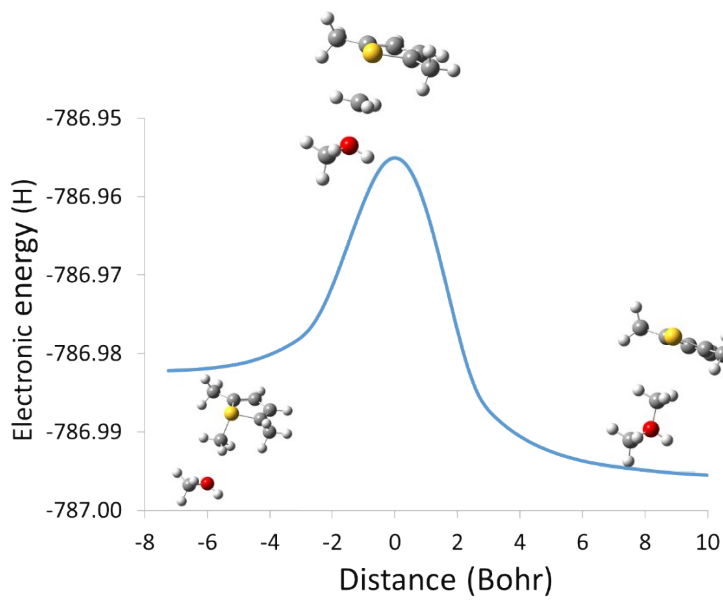

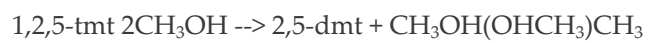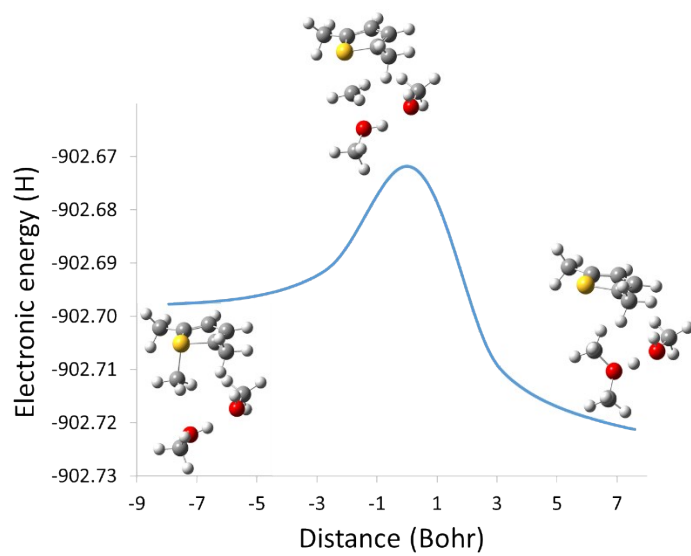

Supplement: c9ob01181a1.pdf [file c9ob01181a1.pdf]
